# Supplementary material for: A robust six-gene prognostic signature based on two prognostic subtypes constructed by chromatin regulators is correlated with immunological features and therapeutic response in lung adenocarcinoma
Source: Aging (Albany NY). 2023 Nov 7;15(21):12330–68. doi: 10.18632/aging.205183 (PMC10683604; doi:10.18632/aging.205183)
Supplement: Supplementary Figures [file aging-15-205183-s001.pdf]

## SUPPLEMENTARY FIGURES

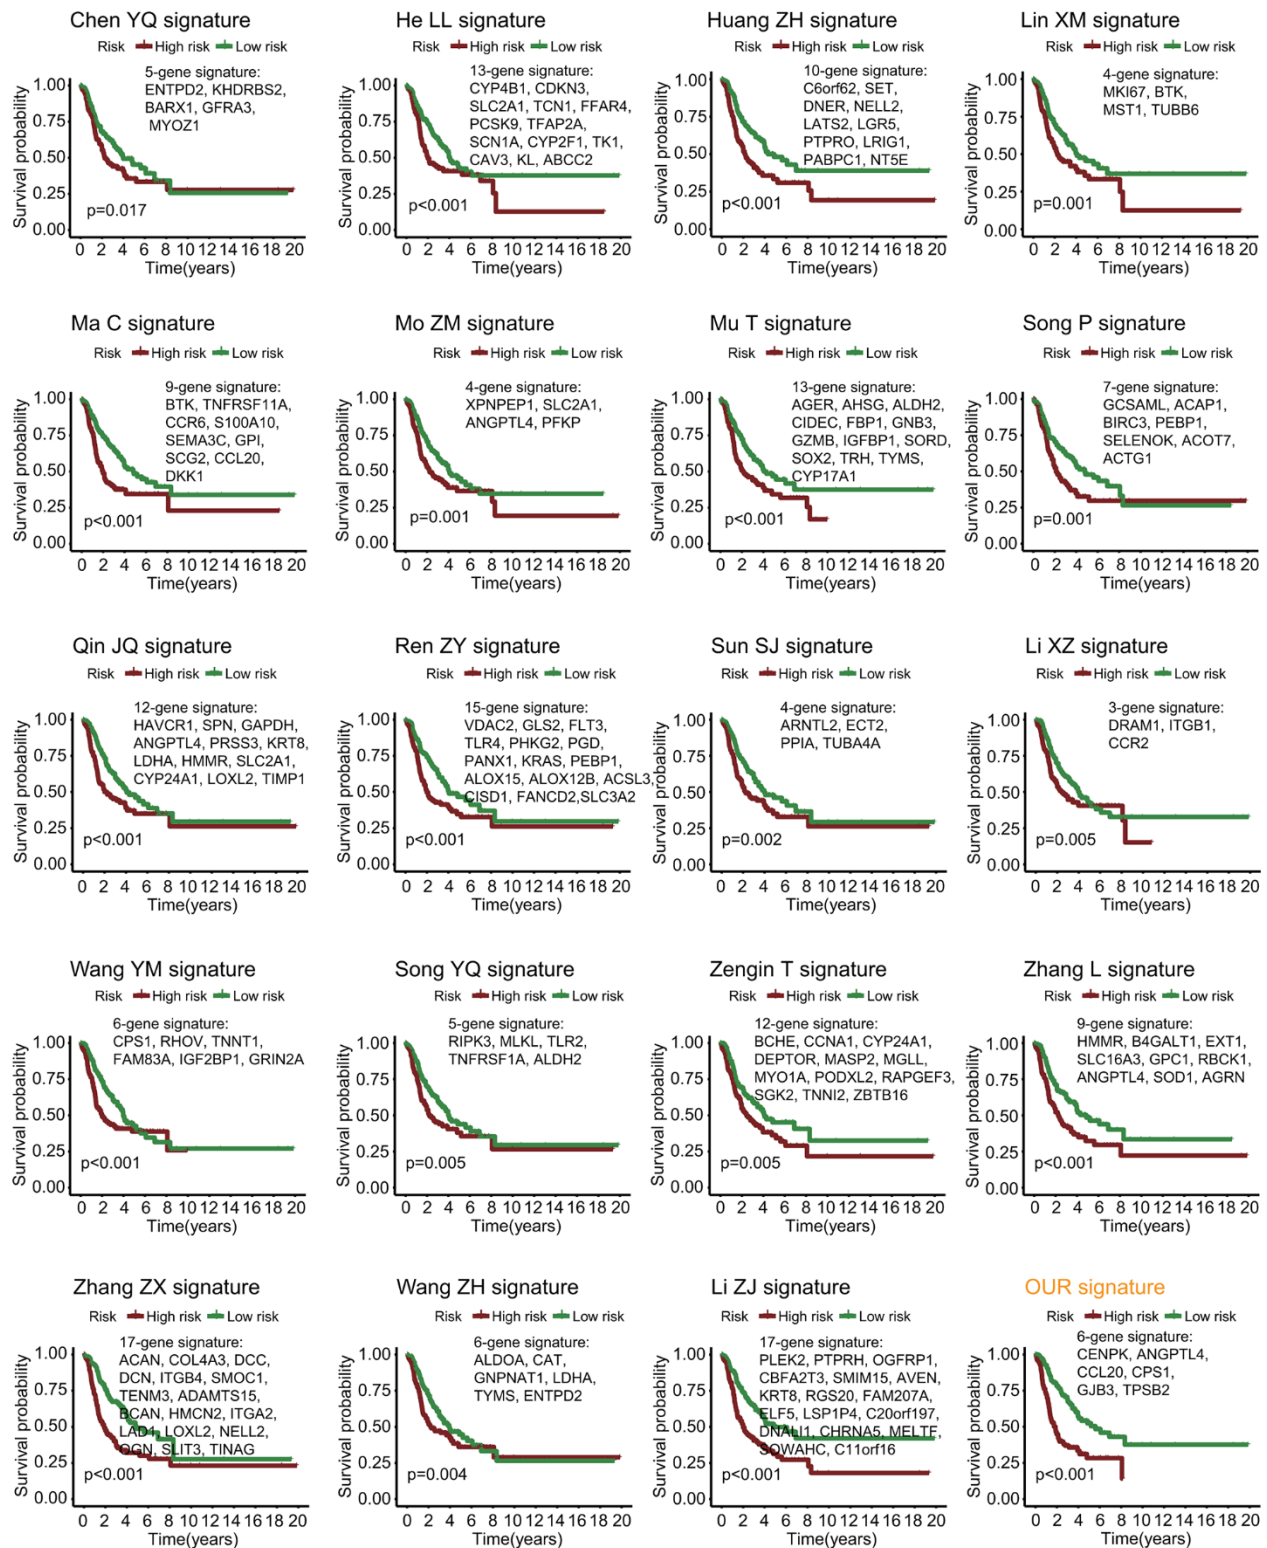

Supplementary Figure 1. Survival curves of 20 prognostic signatures.

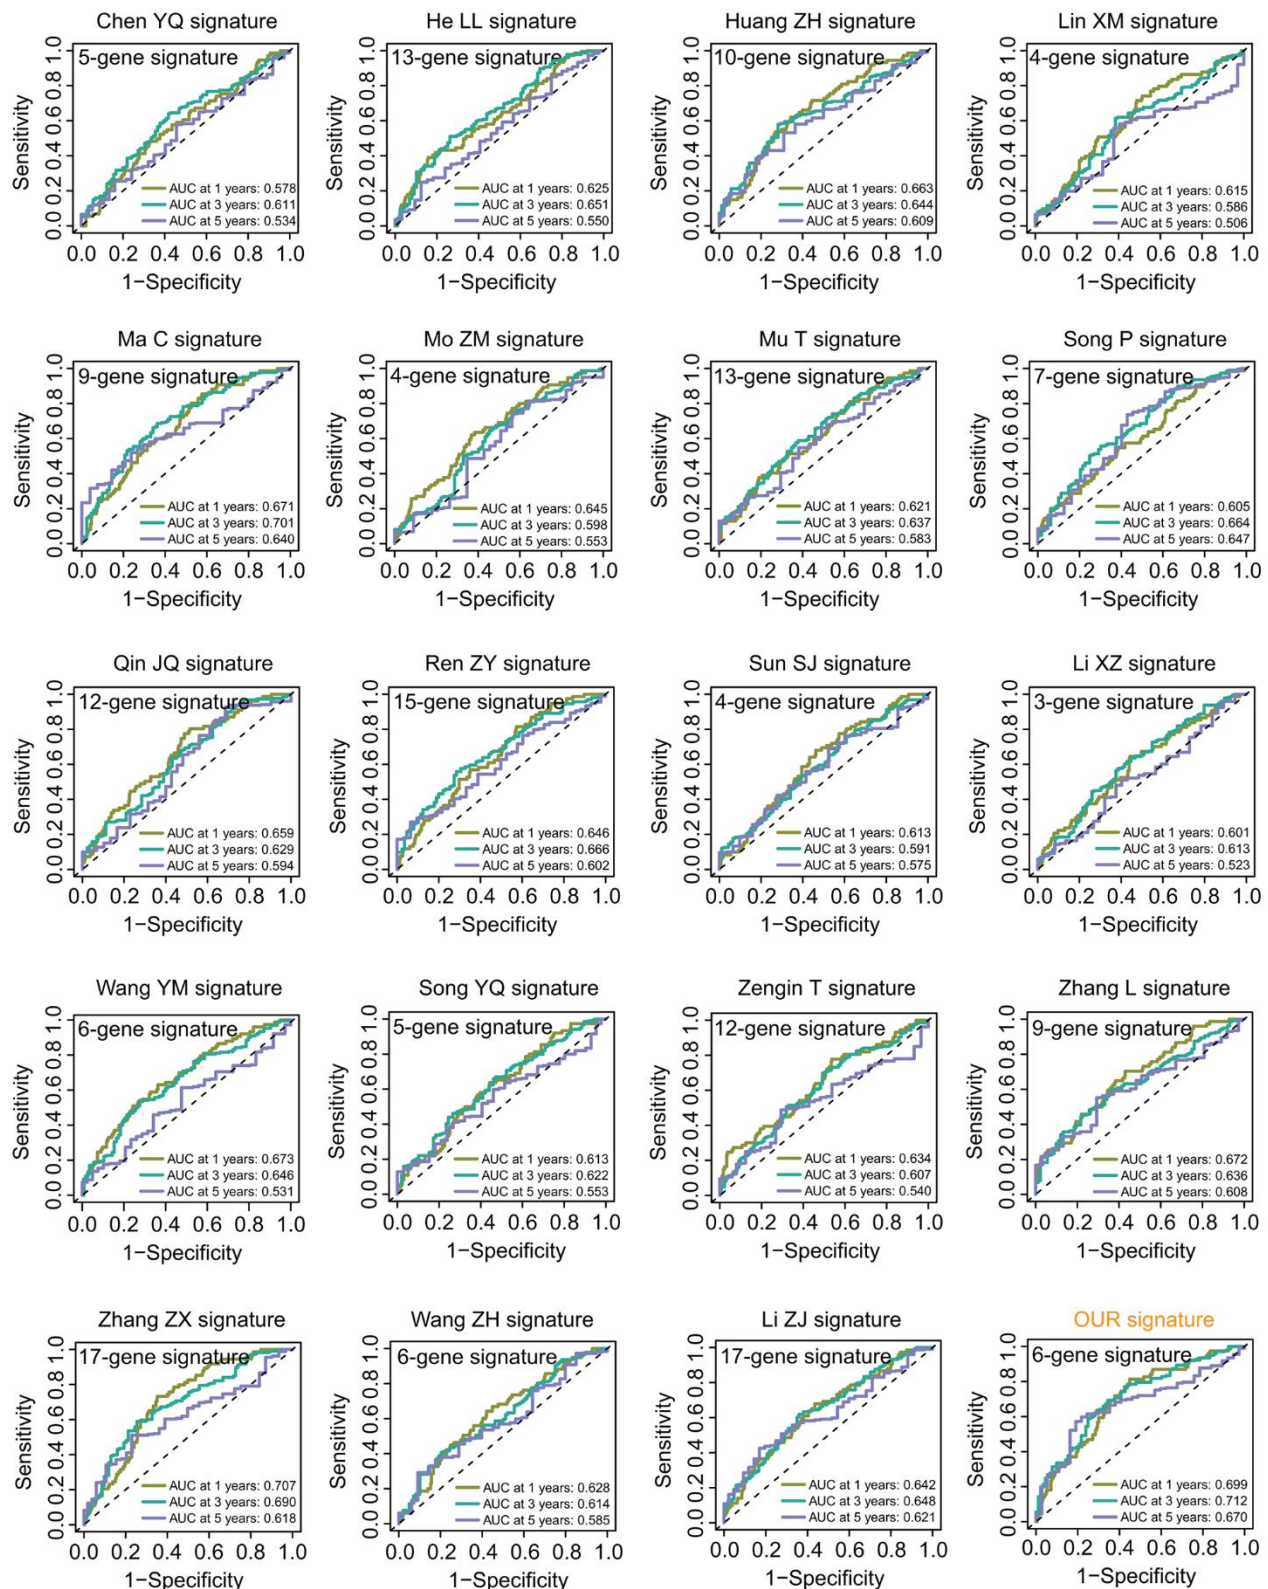

**Supplementary Figure 2. Receiver operating characteristic curves of 20 prognostic signatures by weighting aalen method.**

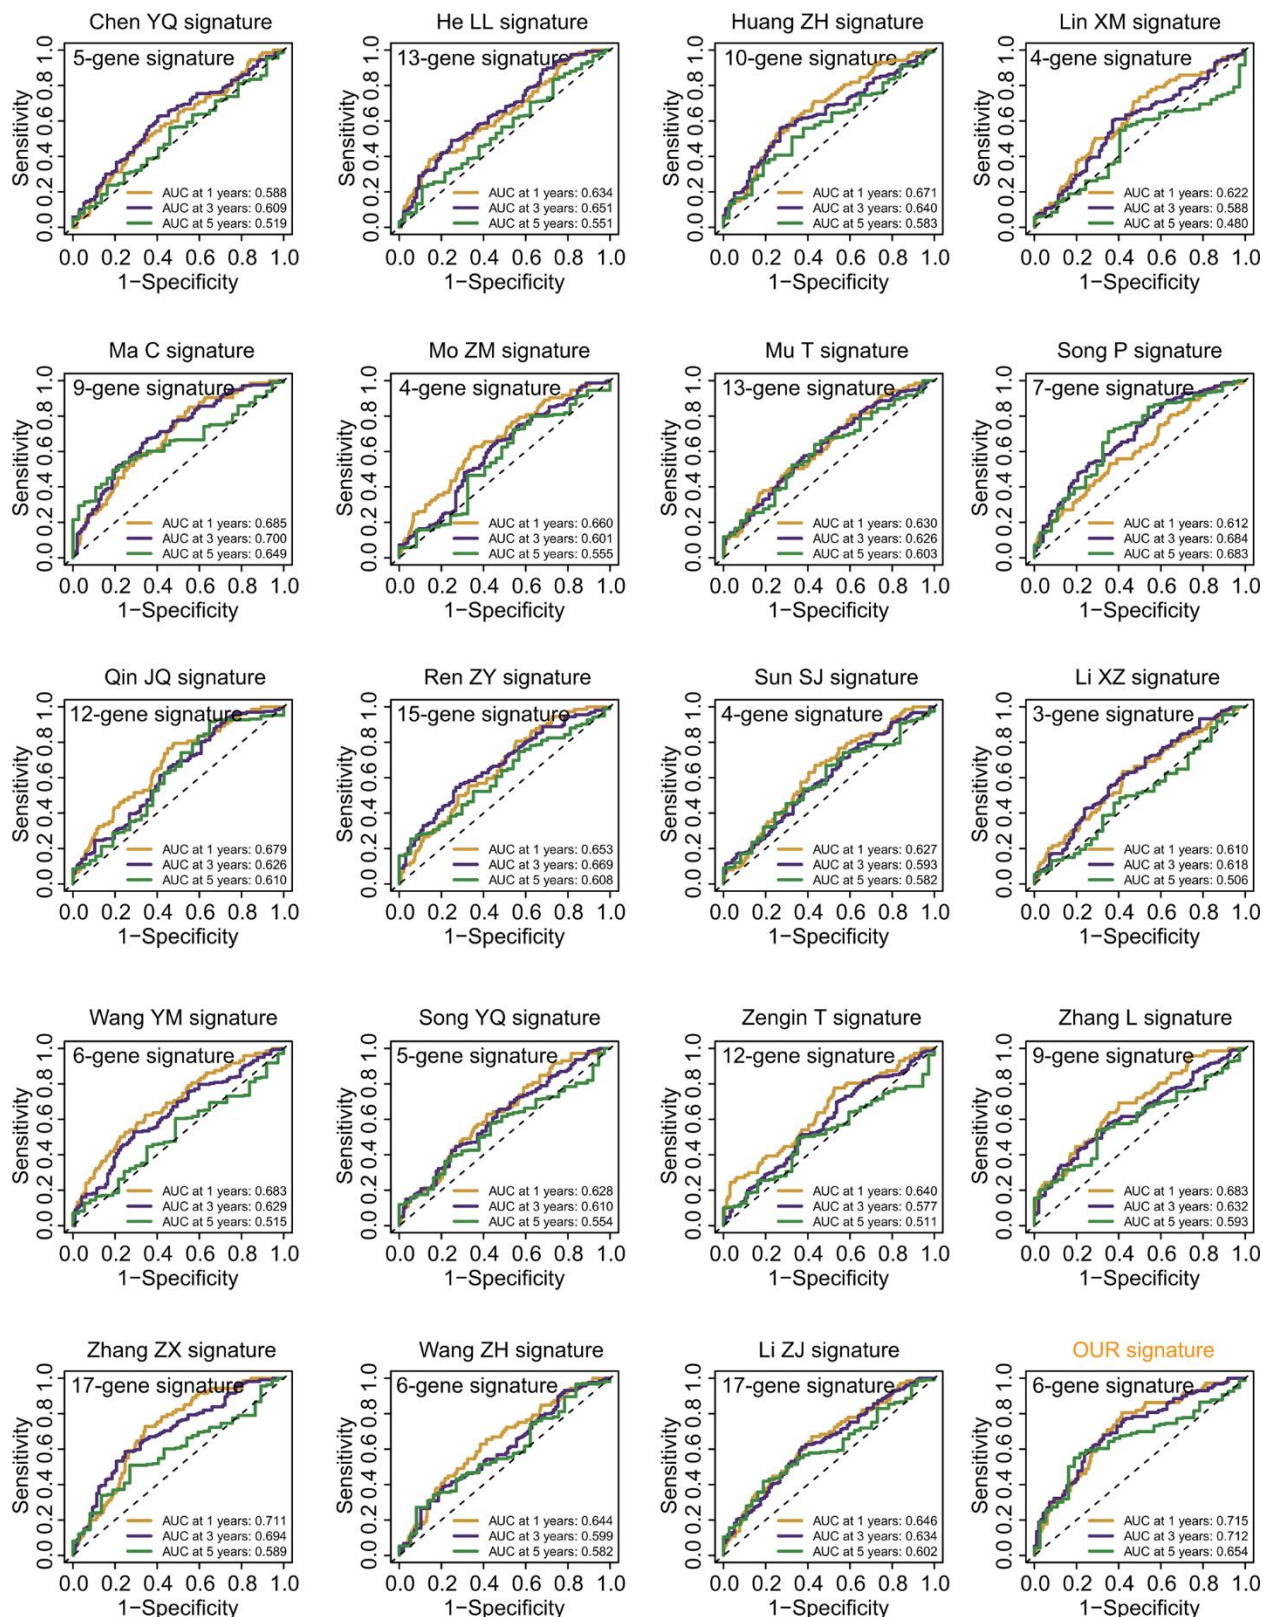

Supplementary Figure 3. Receiver operating characteristic curves of 20 prognostic signatures by weighting marginal method.
