# Supplementary material for: Dilepton (e sup + e sup minus ) production recent pp and pd studies with DLS at Berkeley
Source: publisher site journal article supplement (doi:10.18632/aging.205183), 1991-09-01
Supplement: Supplementary file [file aging-v15i21-205183-supplementary-material-SD9.pdf]

**Supplementary Table 8. KEGG pathways enriched by GSEA method.**

| Description                               | setSize | E_Score            | NES               | p value               | p.adjust            | q value              |
|-------------------------------------------|---------|--------------------|-------------------|-----------------------|---------------------|----------------------|
| <b>Upregulated pathways</b>               |         |                    |                   |                       |                     |                      |
| DNA Replication                           | 35      | 0.736449729396368  | 2.03690969516193  | 0.0000151369217012898 | 0.00137745987481737 | 0.00117908653252152  |
| Homologous Recombination                  | 26      | 0.724404474641536  | 1.90935319570508  | 0.000513905955422847  | 0.0230609512890726  | 0.0197398541977024   |
| Mismatch Repair                           | 22      | 0.721934747964346  | 1.82178519953093  | 0.00155816303419186   | 0.030426628602272   | 0.0260447717358951   |
| Cell Cycle                                | 119     | 0.672607485893627  | 2.27660731776706  | 0.0000000001          | 0.0000000182        | 1.55789473684211E-08 |
| Proteasome                                | 42      | 0.602774052010137  | 1.72675095759965  | 0.00183956842508467   | 0.030426628602272   | 0.0260447717358951   |
| P53 Signaling Pathway                     | 65      | 0.566574926625628  | 1.76199825945229  | 0.000633542617831664  | 0.0230609512890726  | 0.0197398541977024   |
| Oocyte Meiosis                            | 91      | 0.548935448235104  | 1.79946064847862  | 0.000068003858822793  | 0.00412556743524944 | 0.00353142845816609  |
| Pyrimidine Metabolism                     | 89      | 0.492113129094618  | 1.60118875704439  | 0.00200615133641354   | 0.030426628602272   | 0.0260447717358951   |
| Cytokine Receptor Interaction             | 188     | 0.398099737708487  | 1.45859198111463  | 0.00448783412482144   | 0.0480462241598531  | 0.041126900958116    |
| <b>Downregulated pathways</b>             |         |                    |                   |                       |                     |                      |
| Cell Adhesion Molecules Cams              | 109     | -0.489168465420973 | -1.62245237410999 | 0.00144964281019493   | 0.030426628602272   | 0.0260447717358951   |
| Fc Epsilon R1 Signaling Pathway           | 69      | -0.55595778141551  | -1.69713254845712 | 0.00149733080740598   | 0.030426628602272   | 0.0260447717358951   |
| Long Term Depression                      | 52      | -0.576665210604918 | -1.66761252448888 | 0.00220390715752221   | 0.0308547002053109  | 0.0264111950860961   |
| Viral Myocarditis                         | 57      | -0.588035222535862 | -1.74220768693252 | 0.000986954262565194  | 0.0299376126311442  | 0.02562618085257     |
| Valine Leucine and Isoleucine Degradation | 43      | -0.58869102821266  | -1.65698112512393 | 0.00417156420719961   | 0.0474515428568956  | 0.0406178620174699   |
| Arachidonic Acid Metabolism               | 41      | -0.596886153027357 | -1.66240044710594 | 0.00350612041001675   | 0.0455795653302178  | 0.0390154752392842   |
| Asthma                                    | 20      | -0.718605219525618 | -1.71889016635074 | 0.00395824541300939   | 0.0474515428568956  | 0.0406178620174699   |
| Alpha Linolenic Acid Metabolism           | 15      | -0.76076493050057  | -1.71769231258579 | 0.00198981558384615   | 0.030426628602272   | 0.0260447717358951   |
