# Supplementary material for: A robust six-gene prognostic signature based on two prognostic subtypes constructed by chromatin regulators is correlated with immunological features and therapeutic response in lung adenocarcinoma
Source: Aging (Albany NY). 2023 Nov 7;15(21):12330–68. doi: 10.18632/aging.205183 (PMC10683604; doi:10.18632/aging.205183)
Supplement: Supplementary Table 1 [file aging-15-205183-s002.xls]

## Sheet: tcga.diff.fit
Supplementary Table 1. Differentially expressed genes between LUAD and normal lung tissues.
Gene symbol	logFC	AveExpr	t	P.Value	adj.P.Val	B
Upregulated genes
SPP1	4.29935	6.44156	15.9445	4.50298e-47	1.8337e-45	96.1119
CRABP2	4.1841	5.6387	14.0362	2.64073e-38	6.39908e-37	76.0226
FAM83A	3.46223	3.3404	15.929	5.32784e-47	2.16432e-45	95.9445
SPINK1	3.43643	3.91793	8.78658	2.12221e-17	1.20642e-16	28.2718
CEACAM5	3.31272	5.28831	8.6231	7.49456e-17	4.08919e-16	27.0262
PYCR1	3.28716	4.86679	25.0588	4.0257e-92	1.22206e-89	199.457
CTHRC1	3.23863	4.53356	17.673	2.43062e-55	1.40273e-53	115.068
B3GNT3	3.06947	3.60354	17.5721	7.50062e-55	4.18831e-53	113.946
UBE2C	3.03846	3.97758	15.2568	7.30587e-44	2.45925e-42	88.7548
MMP1	3.03726	3.65349	10.7731	1.2883e-24	1.24838e-23	44.7176
S100P	3.00991	5.03274	7.92307	1.36337e-14	6.23981e-14	21.8958
COL10A1	2.9421	3.16787	15.0728	5.17402e-43	1.64858e-41	86.8068
HMGB3	2.90746	5.37579	15.7882	2.44151e-46	9.56888e-45	94.4292
MMP11	2.85186	2.94918	12.7174	1.53212e-32	2.57606e-31	62.83
COL1A1	2.82377	7.33431	13.3589	2.60878e-35	5.32472e-34	69.1662
TOP2A	2.77945	3.59468	17.0648	2.10614e-52	1.09205e-50	108.331
MYBL2	2.76564	3.41089	14.2112	4.338e-39	1.09905e-37	77.819
EEF1A2	2.74287	2.87988	8.52503	1.58443e-16	8.44352e-16	26.2874
MDK	2.73067	6.46548	15.6198	1.49871e-45	5.49944e-44	92.623
CST1	2.72378	2.58488	9.71521	1.19375e-20	8.71105e-20	35.6697
CP	2.70953	4.55729	11.3649	6.01462e-27	6.86398e-26	50.0405
CDC20	2.70396	3.44886	16.1302	6.00213e-48	2.54344e-46	98.118
TMPRSS4	2.68461	2.85169	14.0992	1.37903e-38	3.41101e-37	76.6687
ETV4	2.67495	3.2894	17.6708	2.48986e-55	1.42855e-53	115.044
CYP24A1	2.66937	2.64911	9.807	5.53958e-21	4.1345e-20	36.4295
SLC2A1	2.66717	4.30666	14.2638	2.51516e-39	6.45057e-38	78.3612
PPP1R14D	2.54994	2.54773	9.68824	1.49441e-20	1.0834e-19	35.4474
UBE2T	2.54157	3.66271	18.5386	1.44877e-59	1.04262e-57	124.758
GJB2	2.53667	2.90324	12.404	3.25331e-31	5.06218e-30	59.7944
TPX2	2.51776	3.32993	14.9379	2.15979e-42	6.69015e-41	85.3849
GPX2	2.48128	3.17393	6.39797	3.45327e-10	1.09674e-09	11.9436
MMP12	2.46375	2.96882	10.1515	2.97365e-22	2.42186e-21	39.3253
COL3A1	2.42625	7.49881	12.4901	1.40984e-31	2.23751e-30	60.625
GOLM1	2.41357	5.6944	19.8582	4.39847e-66	3.90622e-64	139.709
CXCL13	2.40766	3.5032	9.94823	1.68393e-21	1.30525e-20	37.6083
PODXL2	2.35113	3.83386	11.5194	1.43945e-27	1.72033e-26	51.4594
THBS2	2.34806	4.29975	12.8046	6.49912e-33	1.13031e-31	63.6821
BIRC5	2.3426	2.87569	14.659	4.07583e-41	1.15928e-39	82.4621
PAEP	2.33954	2.38289	6.28127	6.98332e-10	2.16676e-09	11.2557
SPDEF	2.31495	3.64058	11.2917	1.17857e-26	1.31095e-25	49.3731
PSAT1	2.31036	3.08034	14.0409	2.5166e-38	6.11604e-37	76.0705
CBLC	2.30037	3.24013	16.3077	8.67504e-49	3.88307e-47	100.044
KCNN4	2.26009	3.33665	11.6018	6.68268e-28	8.19044e-27	52.2209
C15orf48	2.25347	4.33505	10.107	4.35602e-22	3.50666e-21	38.9472
TK1	2.24846	4.48035	14.7583	1.43479e-41	4.26249e-40	83.5008
CXCL14	2.24254	3.9707	7.02125	6.7344e-12	2.47496e-11	15.7989
CCNB1	2.22773	3.52327	15.9058	6.8517e-47	2.7499e-45	95.6941
NQO1	2.22426	5.40601	10.0636	6.31296e-22	5.02868e-21	38.5798
HS6ST2	2.22426	2.64877	13.0618	5.0978e-34	9.5418e-33	66.2116
GPT2	2.19043	2.97524	14.3022	1.6881e-39	4.37647e-38	78.7578
RRM2	2.18644	2.94886	14.7432	1.68222e-41	4.9887e-40	83.3425
PHLDA2	2.15681	4.41737	13.237	8.86478e-35	1.7392e-33	67.9503
PTGES	2.13587	3.80293	12.102	5.94229e-30	8.44361e-29	56.9093
ANLN	2.12728	2.50985	13.8542	1.71044e-37	3.91735e-36	74.1646
SYT7	2.12685	2.87343	11.6685	3.5843e-28	4.48266e-27	52.8392
PLPP2	2.12466	3.38101	17.4874	1.92868e-54	1.06626e-52	113.005
DNAJC12	2.11299	2.5246	9.45654	1.01157e-19	6.90479e-19	33.5554
HIST1H2BD	2.10346	4.08041	14.5853	8.81834e-41	2.44977e-39	81.6943
TFF1	2.09372	2.04898	5.56102	4.24981e-08	1.12146e-07	7.25517
SLC7A5	2.0893	4.13858	12.3028	8.64825e-31	1.30435e-29	58.8233
RHOV	2.07418	2.95213	9.53482	5.32041e-20	3.69354e-19	34.191
ABCC3	2.06507	4.17701	12.272	1.16324e-30	1.73485e-29	58.5289
CA9	2.05408	2.07311	8.03789	5.94002e-15	2.79522e-14	22.7141
BPIFA1	2.04461	3.97416	4.29414	2.08449e-05	4.25408e-05	1.28846
ZWINT	2.03051	3.38013	15.9599	3.81177e-47	1.56367e-45	96.2778
FGB	2.02642	1.97608	5.12799	4.10689e-07	9.95913e-07	5.05874
PPP1R14B	2.01688	5.5235	19.0855	2.94697e-62	2.33188e-60	130.932
NECTIN4	2.01387	3.95552	15.3276	3.43292e-44	1.16995e-42	89.5065
COL11A1	2.00138	1.91174	9.02051	3.38711e-18	2.04799e-17	30.0845
CDCA8	1.99846	2.68532	15.4669	7.73644e-45	2.74241e-43	90.9894
OCIAD2	1.99163	5.15205	17.8113	5.1741e-56	3.10744e-54	116.609
KIF2C	1.98983	2.35051	14.1308	9.95501e-39	2.47605e-37	76.9928
LGR4	1.98715	3.16004	16.3101	8.45228e-49	3.79353e-47	100.07
PROM2	1.98622	3.44805	13.4449	1.09656e-35	2.29138e-34	70.0278
CDH3	1.9834	3.47645	9.84234	4.11648e-21	3.10288e-20	36.7234
FUT2	1.9825	2.51763	15.1484	2.31885e-43	7.56163e-42	87.6055
ALG1L	1.98243	2.54948	11.4456	2.85281e-27	3.32384e-26	50.7806
GCNT3	1.98154	2.03822	9.44461	1.11529e-19	7.5818e-19	33.4589
HMGA1	1.97714	6.25842	13.9187	8.83596e-38	2.06041e-36	74.8215
CEP55	1.97229	2.50361	14.3571	9.54124e-40	2.5166e-38	79.3253
KDELR3	1.97067	4.41808	16.1381	5.50397e-48	2.34424e-46	98.2043
AOC1	1.96945	2.15155	7.90989	1.49886e-14	6.83742e-14	21.8025
MMP9	1.9654	4.31227	9.50077	7.03875e-20	4.85615e-19	33.9142
TESC	1.96243	3.84796	6.8654	1.85265e-11	6.5631e-11	14.8067
FOXM1	1.96087	2.45878	13.5358	4.37303e-36	9.36052e-35	70.9418
LCN2	1.96085	5.471	7.16075	2.68078e-12	1.02188e-11	16.7028
MUC5B	1.9588	2.93948	5.79062	1.19973e-08	3.33179e-08	8.48404
PAFAH1B3	1.95694	4.36261	16.1121	7.30844e-48	3.08136e-46	97.922
AURKB	1.9456	2.31763	13.4759	8.01768e-36	1.68593e-34	70.3391
IGLL5	1.94405	4.76739	8.26598	1.11028e-15	5.54012e-15	24.367
IGFBP3	1.94355	5.51987	10.5291	1.11785e-23	1.01543e-22	42.5759
COMP	1.94234	2.85241	8.39458	4.24697e-16	2.18647e-15	25.3147
PLEK2	1.93097	3.14544	14.697	2.7352e-41	7.92828e-40	82.8589
NME1	1.92795	3.88781	18.0892	2.29122e-57	1.46568e-55	119.714
TMEM184A	1.92618	2.41678	16.5068	9.83101e-50	4.57211e-48	102.212
MARCKSL1	1.92014	6.55859	15.5692	2.58229e-45	9.35225e-44	92.0815
CCNB2	1.91686	2.5491	14.7221	2.09977e-41	6.19396e-40	83.122
EFNA4	1.91553	3.79077	19.0952	2.6413e-62	2.11e-60	131.041
NUSAP1	1.91226	3.0799	15.3351	3.16846e-44	1.08403e-42	89.5862
STEAP1	1.91086	3.18532	10.5171	1.24262e-23	1.12468e-22	42.471
SULF1	1.90427	3.56427	10.6199	5.02271e-24	4.67703e-23	43.3688
SPAG4	1.90181	2.60853	15.7749	2.81886e-46	1.09197e-44	94.2861
MEX3A	1.88994	2.01368	12.838	4.6751e-33	8.17334e-32	64.0094
KRT80	1.88926	3.38705	12.3718	4.44169e-31	6.85384e-30	59.4851
MMP13	1.87826	1.85454	7.70547	6.42024e-14	2.80022e-13	20.3705
SERINC2	1.87247	5.41798	14.4941	2.28799e-40	6.24187e-39	80.7458
MUC13	1.869	1.96602	6.11058	1.91902e-09	5.7245e-09	10.2692
NEK2	1.86552	2.09573	13.9435	6.84903e-38	1.60381e-36	75.0748
IQGAP3	1.86355	2.08767	15.1788	1.67684e-43	5.52201e-42	87.928
AKR1B10	1.85945	1.90891	5.35079	1.30314e-07	3.29506e-07	6.16889
TNFRSF21	1.84399	5.46468	15.3256	3.50662e-44	1.19239e-42	89.4853
IQANK1	1.83959	3.37005	15.9148	6.21175e-47	2.49907e-45	95.7917
ANKRD22	1.8388	2.90636	11.0563	1.009e-25	1.05223e-24	47.2431
PLK1	1.82889	2.24572	14.7184	2.18361e-41	6.42991e-40	83.083
PLAU	1.82639	4.99382	8.94688	6.05759e-18	3.59281e-17	29.5101
SPAG5	1.82507	2.33143	14.713	2.31137e-41	6.7703e-40	83.0264
MELK	1.82426	2.09075	13.2554	7.3755e-35	1.45557e-33	68.1331
MUC21	1.81869	2.92762	6.40396	3.32984e-10	1.05916e-09	11.9792
CDCA7	1.81803	2.40753	12.5344	9.16966e-32	1.4735e-30	61.0523
AGR2	1.81561	6.73692	7.78616	3.6281e-14	1.60633e-13	20.9322
PCP4	1.81437	1.98112	6.68495	5.84526e-11	1.98278e-10	13.6811
CCNA2	1.81402	2.54619	13.4668	8.78612e-36	1.84057e-34	70.2481
SAPCD2	1.81362	1.99041	14.6178	6.27711e-41	1.76139e-39	82.0325
DSP	1.81186	4.57185	9.39587	1.66029e-19	1.11415e-18	33.0654
CRLF1	1.80904	3.18856	5.59503	3.53318e-08	9.38883e-08	7.43443
MKI67	1.80838	2.3158	13.0505	5.70297e-34	1.06387e-32	66.1001
ITPKA	1.80712	1.84273	8.8116	1.747e-17	9.98903e-17	28.464
RECQL4	1.79501	2.34422	14.1581	7.5084e-39	1.87385e-37	77.2734
FERMT1	1.78992	2.25644	13.979	4.75711e-38	1.13464e-36	75.4372
KIFC1	1.78504	2.61909	12.932	1.84793e-33	3.31752e-32	64.9317
KIF4A	1.7845	1.95059	13.6522	1.34311e-36	2.93516e-35	72.1154
FGL1	1.78301	1.70783	6.05766	2.61316e-09	7.69613e-09	9.96818
PFKP	1.77822	4.623	11.8459	6.76614e-29	8.8602e-28	54.4942
LAD1	1.77739	5.15139	13.1731	1.68002e-34	3.24274e-33	67.3148
DLGAP5	1.77504	1.98654	13.4739	8.18118e-36	1.71815e-34	70.319
KIF20A	1.76781	2.16747	15.0571	6.11058e-43	1.93591e-41	86.6412
CT83	1.766	1.6635	6.87476	1.74428e-11	6.19099e-11	14.8658
UNC5CL	1.76223	2.21187	13.0814	4.19058e-34	7.88792e-33	66.4064
UCHL1	1.76027	3.1607	6.34311	4.81487e-10	1.51136e-09	11.6188
LARGE2	1.75822	3.13484	11.2331	2.01678e-26	2.19936e-25	48.8402
ADM2	1.75603	1.97392	15.8254	1.63472e-46	6.4371e-45	94.8285
HJURP	1.74627	1.88843	13.2351	9.03568e-35	1.77065e-33	67.9313
AURKA	1.74531	2.70547	13.0676	4.80888e-34	9.04156e-33	66.2696
COL5A2	1.7452	4.27451	10.6238	4.85219e-24	4.5233e-23	43.403
PTTG1	1.74148	3.22089	12.8996	2.54518e-33	4.51107e-32	64.6136
CDCA5	1.74087	2.29492	13.1401	2.33543e-34	4.45627e-33	66.9875
KPNA2	1.73636	4.71304	13.7261	6.32669e-37	1.40279e-35	72.864
IGSF9	1.72934	2.01135	13.4715	8.37982e-36	1.75766e-34	70.2952
ASF1B	1.72915	2.82395	14.4384	4.09256e-40	1.10209e-38	80.1673
CENPF	1.72528	2.01324	13.1913	1.40091e-34	2.72288e-33	67.4954
DERL3	1.7231	3.05699	11.1379	4.81028e-26	5.11544e-25	47.9779
PDIA4	1.71021	6.91221	17.078	1.81861e-52	9.45902e-51	108.477
MROH6	1.70931	2.96867	11.3457	7.17654e-27	8.11785e-26	49.8653
COL5A1	1.70792	4.32786	10.3567	5.04823e-23	4.37618e-22	41.082
COL17A1	1.70765	2.00604	7.277	1.2308e-12	4.82042e-12	17.4671
MCM4	1.70592	3.41165	14.2071	4.52393e-39	1.14269e-37	77.7773
ERO1A	1.70099	4.55901	14.4611	3.23011e-40	8.78337e-39	80.4028
GREM1	1.69647	1.67722	10.263	1.13849e-22	9.53269e-22	40.2763
CDC6	1.69112	1.96563	13.6745	1.07023e-36	2.35423e-35	72.3413
FHL2	1.68149	2.95479	11.5239	1.38129e-27	1.65201e-26	51.5003
SPTBN2	1.68096	2.48237	15.5873	2.12665e-45	7.71883e-44	92.2747
METTL7B	1.6784	2.88143	9.33439	2.73674e-19	1.80961e-18	32.5712
EPN3	1.6778	2.02969	14.7047	2.52269e-41	7.36342e-40	82.9394
B3GNT6	1.67773	1.63099	7.51793	2.3767e-13	9.90797e-13	19.0831
RPL39L	1.67122	3.30898	10.2801	9.81148e-23	8.26501e-22	40.4236
CDK1	1.66529	2.80381	12.2087	2.13759e-30	3.13339e-29	57.9246
RAMP1	1.66491	4.13679	8.82752	1.54311e-17	8.86268e-17	28.5865
S100A2	1.66424	3.12973	7.14638	2.94962e-12	1.11976e-11	16.6089
MZB1	1.66179	3.54001	7.99176	8.30254e-15	3.86126e-14	22.3843
NMU	1.66055	1.74845	8.81392	1.71566e-17	9.81993e-17	28.4818
FUT3	1.65778	2.96284	11.4775	2.12411e-27	2.50453e-26	51.0733
NUF2	1.65518	1.82182	12.9717	1.24681e-33	2.27506e-32	65.3228
SLC50A1	1.65369	5.2727	15.7205	5.06807e-46	1.92748e-44	93.7022
EGLN3	1.64937	2.48936	8.97944	4.68661e-18	2.79855e-17	29.7636
SOX4	1.64388	5.12208	14.9476	1.94937e-42	6.04956e-41	85.4869
PTPRH	1.64347	1.59495	10.419	2.93303e-23	2.58689e-22	41.62
TMPRSS11E	1.63964	1.53938	7.41841	4.71187e-13	1.91363e-12	18.4104
PAICS	1.63703	3.93583	18.7988	7.62744e-61	5.76234e-59	127.691
CLDN3	1.63542	5.5469	8.0921	3.99997e-15	1.90701e-14	23.1037
PITX1	1.63478	1.66782	9.71753	1.17081e-20	8.55487e-20	35.6889
KIF11	1.63152	2.29752	13.9094	9.71891e-38	2.25371e-36	74.7267
PBK	1.63082	1.91944	11.6639	3.7427e-28	4.6633e-27	52.7963
PCLAF	1.62772	2.12468	13.9887	4.30727e-38	1.03029e-36	75.536
P3H4	1.62164	3.24041	14.1753	6.28473e-39	1.57552e-37	77.4503
ADAM8	1.62129	3.44406	11.4427	2.93162e-27	3.41327e-26	50.7536
STX1A	1.61895	2.07894	13.2523	7.6064e-35	1.4976e-33	68.1025
TROAP	1.61531	1.7411	12.287	1.0071e-30	1.51209e-29	58.672
TCN1	1.61357	1.63931	5.55251	4.45009e-08	1.17154e-07	7.21048
PRC1	1.61007	2.41962	13.7589	4.53126e-37	1.01549e-35	73.1958
SMIM22	1.60788	4.23947	10.1544	2.90035e-22	2.36562e-21	39.35
CDKN3	1.60422	2.10471	11.964	2.21176e-29	2.9989e-28	55.6043
GAPDH	1.60244	9.15365	14.0449	2.41415e-38	5.8756e-37	76.1118
CD79A	1.60206	3.6222	7.59176	1.42389e-13	6.02463e-13	19.5869
CDT1	1.60034	2.17558	12.9245	1.98974e-33	3.55682e-32	64.8583
EPCAM	1.59956	7.29601	16.436	2.13368e-49	9.78677e-48	101.44
GALNT14	1.5933	1.84076	9.79573	6.08848e-21	4.53606e-20	36.336
SBK1	1.59231	2.44309	10.8519	6.37111e-25	6.28305e-24	45.4157
TIMP1	1.58756	7.93061	12.5418	8.52555e-32	1.37662e-30	61.1247
NCAPH	1.585	1.98412	12.7759	8.61789e-33	1.47877e-31	63.4017
SLC25A10	1.58476	2.69067	15.1445	2.4152e-43	7.84516e-42	87.5649
INAVA	1.57789	2.80927	12.9931	1.00855e-33	1.84433e-32	65.5335
ECT2	1.57723	3.0074	13.2809	5.70989e-35	1.13762e-33	68.3875
C2CD4A	1.57423	1.70984	9.1569	1.14368e-18	7.20832e-18	31.1574
GGCT	1.57245	4.83737	16.0712	1.13963e-47	4.74494e-46	97.4797
P2RY6	1.57098	2.02272	11.3689	5.79355e-27	6.62983e-26	50.0777
RMI2	1.57061	2.43715	15.6435	1.16187e-45	4.30124e-44	92.8764
PRAME	1.56814	1.43739	6.58512	1.09206e-10	3.6234e-10	13.0694
SMPDL3B	1.56814	4.22426	10.804	9.78022e-25	9.54915e-24	44.9908
POSTN	1.568	5.00569	8.72342	3.46257e-17	1.93802e-16	27.7885
JPT1	1.56472	5.2455	14.2504	2.88725e-39	7.39349e-38	78.224
SLC35F2	1.56315	3.34873	15.7647	3.14778e-46	1.21375e-44	94.1763
ALDH18A1	1.56233	4.73521	21.0196	7.15086e-72	8.06695e-70	152.991
TRIP13	1.5621	2.33406	11.162	3.86148e-26	4.11957e-25	48.1958
EZH2	1.56206	2.19833	15.0377	7.5041e-43	2.35948e-41	86.4368
GINS1	1.55982	1.9158	13.7447	5.23752e-37	1.16663e-35	73.0518
RAC3	1.5582	2.88085	10.6252	4.79211e-24	4.46978e-23	43.4154
RCC1	1.54938	3.91973	18.4718	3.07858e-59	2.17797e-57	124.007
KAT2A	1.54925	4.01945	15.6699	8.74112e-46	3.27224e-44	93.1597
LGSN	1.54788	1.57107	8.81355	1.72057e-17	9.84127e-17	28.479
BUB1B	1.54775	1.7566	13.3731	2.26144e-35	4.63845e-34	69.3082
CDC45	1.54767	1.84584	12.615	4.17505e-32	6.85414e-31	61.834
KRT6A	1.54101	1.81136	4.99328	8.05863e-07	1.89984e-06	4.40826
BARX1	1.53913	1.42976	5.85988	8.12416e-09	2.29239e-08	8.86333
XPR1	1.53908	3.92589	12.9633	1.35569e-33	2.46564e-32	65.2396
LMNB1	1.53365	3.41927	13.1522	2.06954e-34	3.96706e-33	67.1076
HES6	1.53163	2.70447	8.63658	6.75876e-17	3.69739e-16	27.1282
KIF26B	1.53019	1.78953	14.0377	2.60149e-38	6.31316e-37	76.0375
NPM3	1.52974	4.36491	15.1618	2.01078e-43	6.56987e-42	87.7473
TNFRSF18	1.52944	2.27946	10.0294	8.45004e-22	6.67685e-21	38.291
MUC20	1.52701	3.06899	8.59422	9.34929e-17	5.06969e-16	26.808
MYEOV	1.5256	1.4529	7.472	3.26236e-13	1.34523e-12	18.7717
WFDC3	1.52461	1.71582	8.88113	1.01504e-17	5.91933e-17	29.0002
ARHGAP40	1.52353	1.66181	10.2087	1.81797e-22	1.5041e-21	39.8127
MUC3A	1.52236	1.64512	7.46	3.54281e-13	1.45692e-12	18.6907
HMMR	1.52029	1.87168	12.8268	5.22339e-33	9.11282e-32	63.8992
SRPX2	1.51791	3.07218	8.96936	5.07447e-18	3.0226e-17	29.6851
CEACAM1	1.51747	3.09894	11.2647	1.51036e-26	1.66669e-25	49.127
PABPC1L	1.51456	2.61495	10.4273	2.72866e-23	2.41302e-22	41.6915
TOX3	1.51042	2.14526	9.09399	1.88991e-18	1.16521e-17	30.661
MB	1.50844	1.81037	9.28937	3.94064e-19	2.58113e-18	32.2107
AKR7A3	1.50828	1.58698	7.14142	3.04843e-12	1.15569e-11	16.5766
CENPA	1.50704	1.65636	11.9407	2.75972e-29	3.71882e-28	55.3845
IL37	1.50366	1.50982	5.72747	1.70615e-08	4.66524e-08	8.14163
GPR87	1.5032	1.689	6.70354	5.19868e-11	1.7739e-10	13.7959
CENPU	1.50271	2.31672	13.1304	2.57172e-34	4.90154e-33	66.8917
MCM2	1.50103	3.19748	12.3001	8.87854e-31	1.33546e-29	58.7972
TLCD1	1.49522	3.81158	13.571	3.06109e-36	6.61163e-35	71.2964
TFPI2	1.49478	3.4655	4.59744	5.34857e-06	1.1614e-05	2.58865
FKBP11	1.49275	3.24754	14.1107	1.22564e-38	3.0361e-37	76.786
RTN4RL2	1.49195	2.15518	8.9633	5.32284e-18	3.16264e-17	29.6379
UHRF1	1.49038	1.68102	13.7808	3.62173e-37	8.17141e-36	73.4186
EPHX3	1.48958	2.82374	9.61273	2.79666e-20	1.98778e-19	34.8273
FAM83D	1.4893	2.36842	11.2178	2.32077e-26	2.52263e-25	48.7009
TMEM59L	1.47888	1.81665	6.04973	2.73644e-09	8.04784e-09	9.92324
DBNDD1	1.47637	2.7114	14.4479	3.70562e-40	1.00437e-38	80.2661
QPCT	1.46848	3.12961	6.61148	9.26585e-11	3.08849e-10	13.2302
SEMA4B	1.46239	4.56454	12.2465	1.48668e-30	2.20246e-29	58.2852
SIX1	1.46189	2.12352	9.32503	2.95254e-19	1.94844e-18	32.4961
BCL2L15	1.4592	1.65301	10.9392	2.90674e-25	2.93948e-24	46.1938
KIF18B	1.45803	1.54776	12.0164	1.34428e-29	1.84726e-28	56.0987
HGD	1.45754	1.9304	6.64283	7.61623e-11	2.56166e-10	13.4221
LYPD3	1.45629	2.02216	7.67889	7.74045e-14	3.34804e-13	20.1865
ST6GALNAC1	1.45019	3.66886	6.99411	8.04275e-12	2.93833e-11	15.6248
RHPN1	1.45004	2.92644	10.5429	9.90528e-24	9.04697e-23	42.6957
GINS2	1.44944	1.84951	12.819	5.64257e-33	9.83386e-32	63.8225
TMEM132A	1.44752	2.77786	10.9406	2.86985e-25	2.9057e-24	46.2065
TYMS	1.44696	3.04851	12.7887	7.60376e-33	1.30744e-31	63.5261
SLC29A4	1.44432	1.90509	8.9566	5.6112e-18	3.33042e-17	29.5857
NDC80	1.44343	1.72584	12.2742	1.13892e-30	1.70236e-29	58.5499
RHBDL2	1.44334	1.93517	13.3156	4.03099e-35	8.13801e-34	68.7337
FA2H	1.43725	2.52941	8.91909	7.53682e-18	4.44488e-17	29.2943
TXNDC17	1.43478	4.09222	13.0647	4.94827e-34	9.28274e-33	66.2412
EFNA3	1.43475	1.71937	13.8889	1.19868e-37	2.76424e-36	74.5182
BUB1	1.43415	1.95533	12.0368	1.10721e-29	1.53922e-28	56.2913
TMEM45B	1.4301	3.89426	9.81261	5.28487e-21	3.95147e-20	36.4761
CCNE1	1.42873	1.70391	11.3588	6.3607e-27	7.24902e-26	49.985
ST14	1.42527	5.91133	12.7493	1.11955e-32	1.9054e-31	63.1417
PSMG3	1.42213	4.22963	14.6501	4.47263e-41	1.26998e-39	82.3697
CLDN10	1.42198	1.66373	6.47096	2.21125e-10	7.14516e-10	12.3793
XDH	1.42162	1.55862	10.0391	7.7819e-22	6.16935e-21	38.3726
TNS4	1.4168	1.80073	6.40608	3.28709e-10	1.04635e-09	11.9918
SCG5	1.41641	1.93768	8.22177	1.54091e-15	7.60257e-15	24.0439
PLXNB3	1.41619	1.63146	10.0093	1.00244e-21	7.89467e-21	38.1219
SLC17A9	1.41343	2.09693	9.8976	2.58411e-21	1.97547e-20	37.1843
BOP1	1.41332	3.81416	12.6397	3.2797e-32	5.43232e-31	62.0738
PKP3	1.41139	4.24968	12.9373	1.75343e-33	3.15807e-32	64.9839
WFDC2	1.41006	7.36912	6.56647	1.22634e-10	4.04883e-10	12.9559
SRPK1	1.40767	3.66044	18.8356	5.02688e-61	3.81495e-59	128.106
ITGA11	1.40663	1.82112	9.72445	1.10519e-20	8.10376e-20	35.7459
PLEKHN1	1.4053	1.62026	14.0289	2.84679e-38	6.88842e-37	75.9479
NCAPG	1.40514	1.63874	11.8998	4.0645e-29	5.42453e-28	55.0001
C1QTNF6	1.40199	2.1391	12.9226	2.02736e-33	3.6202e-32	64.8396
CPXM1	1.39876	2.34777	10.0488	7.16211e-22	5.69422e-21	38.4548
FKBP10	1.39759	4.47175	8.24859	1.26329e-15	6.2643e-15	24.2397
B4GALNT4	1.39407	1.3936	8.33706	6.5363e-16	3.32207e-15	24.8895
TNNT1	1.39193	2.19272	5.74149	1.57829e-08	4.33335e-08	8.21736
THY1	1.38861	3.61939	9.99323	1.1495e-21	9.01034e-21	37.9863
FBXO32	1.38313	2.80765	10.7952	1.05742e-24	1.02943e-23	44.9134
REEP6	1.38287	2.67106	8.27045	1.07401e-15	5.36232e-15	24.3998
PGGHG	1.38275	4.01463	6.37611	3.94339e-10	1.24624e-09	11.8139
GALNT7	1.38087	3.37915	14.0938	1.4586e-38	3.59185e-37	76.6129
CABYR	1.38024	1.42369	8.27754	1.01886e-15	5.09921e-15	24.4517
VSTM2L	1.3774	4.26501	5.75449	1.46812e-08	4.04216e-08	8.28771
ARHGEF16	1.37435	2.80757	14.9114	2.85657e-42	8.76714e-41	85.1067
CNFN	1.37051	1.90057	9.97915	1.29556e-21	1.01267e-20	37.8679
MANF	1.37044	5.20435	16.2065	2.61662e-48	1.13179e-46	98.9446
BIK	1.37018	2.72216	10.122	3.83004e-22	3.09517e-21	39.0746
PRDX4	1.36746	5.76628	12.9427	1.66253e-33	3.00732e-32	65.0368
CKS1B	1.36668	3.39657	12.0529	9.49653e-30	1.32792e-28	56.4437
CCNO	1.36377	2.16085	8.80769	1.80089e-17	1.02866e-16	28.434
PLA2G4A	1.36332	3.41064	6.50379	1.80709e-10	5.87788e-10	12.5767
PRR36	1.3614	2.25653	10.2869	9.25531e-23	7.82809e-22	40.4814
CCDC167	1.36133	4.54331	13.2684	6.47155e-35	1.28172e-33	68.2631
CILP2	1.35515	1.46855	9.83772	4.27974e-21	3.22303e-20	36.6849
PANX2	1.35358	2.14652	8.98511	4.48114e-18	2.67969e-17	29.8079
GOLGA7B	1.35081	1.87815	9.48277	8.15939e-20	5.61076e-19	33.768
CDKN2A	1.35033	1.76495	6.92952	1.22437e-11	4.40658e-11	15.2127
TEDC2	1.34367	1.43705	15.0129	9.75806e-43	3.05095e-41	86.1755
SLC52A2	1.34172	4.63933	12.9982	9.59006e-34	1.75758e-32	65.5836
RCN3	1.34152	3.90254	8.56416	1.17621e-16	6.31855e-16	26.5814
GTSE1	1.3366	1.54098	12.6376	3.34914e-32	5.54185e-31	62.053
TTYH3	1.33586	4.45922	12.0694	8.11292e-30	1.1421e-28	56.6001
FEN1	1.33005	3.57104	13.0642	4.9768e-34	9.32578e-33	66.2355
MTHFD2	1.32776	3.8665	11.4522	2.68375e-27	3.13342e-26	50.8412
RHBDL1	1.32508	1.56192	10.6946	2.5903e-24	2.45725e-23	44.0252
PRSS2	1.32492	1.50223	4.84282	1.68048e-06	3.83611e-06	3.70043
SHMT2	1.32443	4.31127	13.3277	3.56996e-35	7.24229e-34	68.8544
ZNF692	1.32416	2.88547	12.086	6.92404e-30	9.78864e-29	56.7574
SSR4	1.3225	5.86596	11.8334	7.6103e-29	9.94222e-28	54.3775
UGDH	1.32234	4.71178	8.59111	9.57395e-17	5.18478e-16	26.7845
FAM111B	1.32133	1.6966	12.0177	1.32731e-29	1.82694e-28	56.1113
CCT3	1.32019	6.17189	16.3264	7.07412e-49	3.2008e-47	100.247
TSKU	1.31956	3.75596	9.61899	2.65536e-20	1.89218e-19	34.8786
MUC4	1.31909	2.16616	6.73963	4.13732e-11	1.42514e-10	14.0195
RASAL1	1.31533	1.3449	11.3699	5.74218e-27	6.57554e-26	50.0865
ASPHD1	1.31238	1.90039	8.02742	6.40963e-15	3.01027e-14	22.6392
TIMELESS	1.31228	2.90866	13.242	8.43288e-35	1.65642e-33	67.9999
SPC24	1.31075	1.69811	12.5275	9.7991e-32	1.56861e-30	60.9864
KRTCAP3	1.3106	4.8114	9.77596	7.18558e-21	5.32255e-20	36.172
IL4I1	1.30983	2.52495	8.74476	2.93554e-17	1.65245e-16	27.9515
PLOD2	1.30825	3.42658	7.92467	1.34772e-14	6.17216e-14	21.9071
CPS1	1.30696	1.4544	4.03624	6.22831e-05	0.000121283	0.248103
LAPTM4B	1.30619	6.37372	10.2811	9.72746e-23	8.20251e-22	40.4321
PC	1.30332	2.67193	12.8504	4.1402e-33	7.261e-32	64.1301
DUSP4	1.3031	3.01102	6.39545	3.50669e-10	1.11244e-09	11.9286
TRAF4	1.29835	4.49037	15.713	5.49608e-46	2.08078e-44	93.6215
BARX2	1.29729	1.41441	8.83223	1.48757e-17	8.56431e-17	28.6227
XKRX	1.2953	1.84885	7.99975	7.83578e-15	3.6513e-14	22.4413
BHLHA15	1.2939	1.73411	8.66442	5.45723e-17	3.00905e-16	27.3393
KHDC4	1.2911	3.26721	13.759	4.5258e-37	1.01549e-35	73.197
LDHA	1.29094	6.81248	13.5337	4.46625e-36	9.54782e-35	70.9208
SPRR1B	1.29071	1.33468	4.83815	1.7188e-06	3.9193e-06	3.67874
ABHD11	1.28852	4.2776	12.0321	1.15778e-29	1.60818e-28	56.247
KRT16	1.28836	1.34062	6.37031	4.08447e-10	1.28936e-09	11.7796
NME4	1.28831	4.42748	12.6249	3.79026e-32	6.24085e-31	61.93
SLC7A11	1.2882	1.68262	7.42938	4.37095e-13	1.77992e-12	18.4842
MAD2L1	1.28672	1.78732	11.6416	4.60897e-28	5.71704e-27	52.5896
EXO1	1.28616	1.38588	12.1254	4.75053e-30	6.8023e-29	57.1315
SRD5A3	1.28369	3.86869	9.89383	2.66767e-21	2.03655e-20	37.1528
SLC16A9	1.28134	1.82192	6.75745	3.69474e-11	1.27849e-10	14.1303
ATAD2	1.28114	2.64596	11.4368	3.09491e-27	3.59337e-26	50.6998
TACC3	1.28084	2.86501	12.0961	6.28548e-30	8.91609e-29	56.8535
KRT15	1.27989	2.16708	6.91347	1.35857e-11	4.86856e-11	15.1107
CARD11	1.27968	2.59575	8.85241	1.2707e-17	7.35379e-17	28.7783
COL1A2	1.27939	6.79294	7.19649	2.11252e-12	8.11566e-12	16.9366
SGPP2	1.27777	4.2198	8.1439	2.73619e-15	1.32148e-14	23.4779
LSR	1.27761	6.16799	11.0344	1.23091e-25	1.27648e-24	47.046
STK39	1.2767	3.71709	12.0032	1.52447e-29	2.09141e-28	55.9738
SAMD10	1.27543	2.45598	14.312	1.52427e-39	3.99516e-38	78.8594
GYG2	1.27424	1.87807	11.1374	4.83105e-26	5.13426e-25	47.9736
FDCSP	1.2731	2.04021	5.58607	3.70975e-08	9.82519e-08	7.38709
LY6D	1.2727	1.26501	5.70599	1.92177e-08	5.23338e-08	8.02596
TUBB3	1.27103	1.22348	11.763	1.47701e-28	1.87958e-27	53.7192
DDIT4L	1.27035	1.59989	7.90971	1.50087e-14	6.84472e-14	21.8011
HIST3H2A	1.26961	2.5309	6.25808	8.02229e-10	2.47716e-09	11.1203
SLC16A14	1.26877	2.07166	6.30157	6.18296e-10	1.92451e-09	11.3746
SKA3	1.26845	1.43599	12.4877	1.44359e-31	2.28674e-30	60.6015
SFXN4	1.26837	3.72109	16.2647	1.3862e-48	6.1066e-47	99.5771
TSTA3	1.26775	4.7687	12.096	6.29379e-30	8.9203e-29	56.8522
BZW2	1.26596	4.57558	15.4071	1.46798e-44	5.12748e-43	90.3519
FLAD1	1.26564	3.69097	16.268	1.33799e-48	5.92548e-47	99.6123
SEZ6L2	1.26476	4.08975	7.10705	3.82817e-12	1.44083e-11	16.3531
PKMYT1	1.26315	1.47203	12.4212	2.75224e-31	4.31469e-30	59.9605
PRR11	1.26259	2.0216	10.3296	6.39145e-23	5.47877e-22	40.8482
CFB	1.26202	2.48554	8.77201	2.37658e-17	1.34689e-16	28.16
KRT8	1.26121	7.45991	9.64688	2.10734e-20	1.51005e-19	35.1073
SYT12	1.26067	1.19507	7.68981	7.1685e-14	3.11275e-13	20.262
VMP1	1.26	5.10887	12.5375	8.89353e-32	1.43465e-30	61.0827
AIM2	1.25991	1.8545	7.16899	2.53774e-12	9.67797e-12	16.7566
ARHGEF19	1.25718	3.21668	10.6213	4.96044e-24	4.62163e-23	43.3811
PODNL1	1.25353	1.70456	8.46985	2.40765e-16	1.26449e-15	25.8746
TBX15	1.25212	1.37226	8.52516	1.58282e-16	8.43769e-16	26.2884
TPBG	1.24941	2.56954	12.4166	2.87745e-31	4.50674e-30	59.9163
AK4	1.24906	1.74654	9.1525	1.18464e-18	7.45807e-18	31.1226
ESPN	1.24818	1.79877	8.44525	2.89952e-16	1.51141e-15	25.6912
THEM5	1.24692	2.54648	9.24035	5.85265e-19	3.77135e-18	31.8196
ADGRG1	1.24691	4.18084	9.66926	1.74992e-20	1.25934e-19	35.2912
FOXA3	1.24652	1.57587	7.33566	8.27852e-13	3.29326e-12	17.8566
RFC4	1.24503	2.57112	12.1261	4.72118e-30	6.77189e-29	57.1377
HSPE1	1.24467	5.27924	14.3118	1.52723e-39	3.99664e-38	78.8574
ADAM12	1.24037	1.50625	9.33056	2.823e-19	1.86443e-18	32.5405
BICDL1	1.23836	2.04276	10.6542	3.70651e-24	3.48641e-23	43.67
ADAM28	1.23801	1.91518	9.91827	2.16993e-21	1.6672e-20	37.3573
ZDHHC9	1.23561	5.04724	11.318	9.25964e-27	1.03758e-25	49.6124
C19orf48	1.23476	3.61416	12.2563	1.35316e-30	2.01358e-29	58.3787
KIF23	1.2341	1.65523	11.3029	1.06412e-26	1.18682e-25	49.4744
HIST1H4H	1.23399	2.44788	7.87753	1.89074e-14	8.55263e-14	21.5738
ACY3	1.23307	1.55325	9.02946	3.15545e-18	1.91229e-17	30.1545
SFN	1.23096	6.60469	7.29166	1.11496e-12	4.38731e-12	17.5642
BASP1	1.22935	4.67337	6.91228	1.36908e-11	4.9031e-11	15.1032
STYK1	1.2289	1.64699	11.7944	1.09905e-28	1.41696e-27	54.0126
MCM6	1.22765	3.57873	12.1013	5.98429e-30	8.49606e-29	56.9023
TTK	1.22751	1.38528	11.2388	1.91425e-26	2.09302e-25	48.8919
ADAMDEC1	1.22742	1.89959	7.22921	1.69703e-12	6.57089e-12	17.1516
EIF4EBP1	1.22658	4.82783	8.19872	1.82727e-15	8.97034e-15	23.8759
PRSS22	1.22428	3.29561	8.18502	2.02159e-15	9.8778e-15	23.7762
PGM2L1	1.22346	2.29149	11.927	3.14075e-29	4.21527e-28	55.2561
HSPD1	1.2228	6.07923	14.3022	1.68715e-39	4.37647e-38	78.7584
UQCC2	1.22189	3.12622	13.7211	6.6593e-37	1.47263e-35	72.813
ALDH3B2	1.22049	1.68214	7.8345	2.57178e-14	1.14809e-13	21.2709
ATIC	1.21989	4.5736	18.6609	3.6342e-60	2.68481e-58	126.135
FNDC1	1.21954	2.06174	7.26526	1.3321e-12	5.19763e-12	17.3894
PPAT	1.21931	2.07095	15.2511	7.76683e-44	2.60391e-42	88.6939
SLC6A8	1.2192	2.6634	8.26292	1.1358e-15	5.66408e-15	24.3446
SLC25A39	1.21896	5.52367	14.204	4.67105e-39	1.17452e-37	77.7455
VCAN	1.2184	3.57761	7.27333	1.26164e-12	4.93194e-12	17.4428
FANCI	1.2179	2.05382	12.8466	4.29455e-33	7.51592e-32	64.0938
DEPDC1B	1.21456	1.29431	11.7807	1.25038e-28	1.60464e-27	53.8845
MANEAL	1.21359	2.5143	9.755	8.5631e-21	6.30388e-20	35.9984
NET1	1.21152	5.10707	11.1092	6.24459e-26	6.59454e-25	47.719
H2AFX	1.2102	4.55614	11.496	1.78864e-27	2.11945e-26	51.2439
TONSL	1.20956	1.85189	12.5981	4.92573e-32	8.0391e-31	61.6697
CENPM	1.20869	2.22055	10.8984	4.19638e-25	4.18785e-24	45.8297
CCN4	1.20834	1.80608	10.2823	9.62939e-23	8.12768e-22	40.4422
ENO1	1.20819	8.6802	12.8513	4.10307e-33	7.20346e-32	64.1391
ASPM	1.2073	1.27523	11.4722	2.23e-27	2.62568e-26	51.025
TUBB2B	1.20659	1.53784	5.70278	1.95622e-08	5.32633e-08	8.00869
CD24	1.20644	6.00489	6.4951	1.90639e-10	6.19365e-10	12.5244
TNFRSF25	1.20302	1.9896	9.96708	1.43528e-21	1.1177e-20	37.7665
PIMREG	1.20275	1.37816	10.6762	3.05068e-24	2.88089e-23	43.863
DEPTOR	1.20059	3.21015	9.28479	4.08917e-19	2.67317e-18	32.1741
GPRIN1	1.19907	1.51395	12.1655	3.23683e-30	4.68709e-29	57.5125
SFXN1	1.19891	2.71774	17.9471	1.13027e-56	7.09433e-55	118.124
CAPN5	1.19877	2.76198	7.85293	2.25473e-14	1.01251e-13	21.4004
CPNE7	1.19826	1.41106	9.10438	1.73969e-18	1.07617e-17	30.7428
ASNS	1.19815	2.98045	11.1077	6.33266e-26	6.6791e-25	47.7052
ARNTL2	1.1977	1.98012	8.31534	7.68787e-16	3.87667e-15	24.7294
MND1	1.19732	1.41273	13.3097	4.27757e-35	8.62539e-34	68.6746
HTR3A	1.19657	1.1312	7.26153	1.36592e-12	5.32091e-12	17.3648
HIST1H2AE	1.19603	1.4563	6.77306	3.34555e-11	1.162e-10	14.2276
VIL1	1.19587	1.10365	5.73468	1.6392e-08	4.49174e-08	8.18054
DNTTIP1	1.19256	4.75592	9.55189	4.62264e-20	3.21984e-19	34.3301
RAD51AP1	1.19	1.95284	10.5317	1.09273e-23	9.94776e-23	42.5984
BAIAP2L2	1.18913	1.36708	7.82784	2.6969e-14	1.20137e-13	21.2241
CERCAM	1.18876	3.1273	9.96481	1.46317e-21	1.13783e-20	37.7474
ANGPTL4	1.18824	3.49914	5.34269	1.35969e-07	3.43026e-07	6.12775
HIST1H2BC	1.18711	2.57427	7.3881	5.79567e-13	2.33674e-12	18.207
TMEM177	1.18628	2.31014	19.8913	3.01222e-66	2.68941e-64	140.087
ADCK5	1.1828	2.40128	11.8991	4.0918e-29	5.45661e-28	54.9935
CHPF	1.18194	5.32554	10.1562	2.85665e-22	2.33277e-21	39.3651
IRAK1	1.18189	5.30312	13.507	5.8518e-36	1.2383e-34	70.6522
HIST1H2BG	1.18113	1.36273	7.07527	4.72209e-12	1.76337e-11	16.1471
CDCA3	1.18111	1.33148	12.0936	6.4389e-30	9.11049e-29	56.8296
ITGB4	1.18096	4.49311	6.15264	1.49912e-09	4.5231e-09	10.5101
MEST	1.18085	3.76033	11.3523	6.75042e-27	7.6618e-26	49.926
IER5L	1.18036	2.40326	9.36564	2.12337e-19	1.41468e-18	32.8221
SLC39A11	1.17972	3.58735	14.596	7.88395e-41	2.19384e-39	81.8057
HSH2D	1.1794	2.74817	12.7281	1.37843e-32	2.32703e-31	62.935
GNPNAT1	1.17909	3.23847	12.4007	3.35839e-31	5.22083e-30	59.7628
RAD54L	1.17788	1.30157	11.8176	8.83849e-29	1.15017e-27	54.2289
GFRA3	1.17754	2.09765	4.55833	6.40214e-06	1.37994e-05	2.41638
CCL19	1.17736	4.03271	4.98865	8.24534e-07	1.94167e-06	4.38618
MXRA5	1.17588	3.30566	7.20084	2.05193e-12	7.88833e-12	16.9652
SLFN13	1.17402	2.34011	10.6195	5.03885e-24	4.68944e-23	43.3656
KRT17	1.17378	3.64765	4.05763	5.70038e-05	0.000111379	0.332063
FAP	1.17269	1.74481	10.0828	5.35974e-22	4.28985e-21	38.7419
E2F8	1.17129	1.30584	12.7579	1.02905e-32	1.76034e-31	63.2254
UBE2S	1.17085	2.61993	9.53749	5.20476e-20	3.61927e-19	34.2127
PTK6	1.16963	3.03066	7.6826	7.54116e-14	3.26608e-13	20.2121
MFAP2	1.16861	3.02721	8.35371	5.77062e-16	2.94457e-15	25.0123
MICALL2	1.16837	2.56487	10.6717	3.17417e-24	2.99581e-23	43.8237
GALNT6	1.16821	2.9212	7.14701	2.93733e-12	1.1156e-11	16.613
CIT	1.1666	2.75219	6.1924	1.18545e-09	3.60909e-09	10.7391
AHNAK2	1.16517	2.13747	6.98368	8.60902e-12	3.1404e-11	15.558
CKAP2L	1.16488	1.32194	11.5776	8.37722e-28	1.01721e-26	51.9966
VSIG1	1.16223	1.81969	4.41277	1.23593e-05	2.58261e-05	1.7872
TFAP2A	1.16216	1.2213	9.82185	4.89005e-21	3.66282e-20	36.553
AGT	1.16035	2.31861	5.25367	2.16015e-07	5.36855e-07	5.67974
FNDC4	1.16007	2.39293	7.68039	7.65931e-14	3.31467e-13	20.1969
B4GALT2	1.15787	3.97921	14.6994	2.6655e-41	7.73968e-40	82.8846
ORC1	1.15749	1.43527	11.5008	1.71147e-27	2.02945e-26	51.2876
C11orf80	1.15734	2.69621	14.6825	3.18281e-41	9.11495e-40	82.7081
METTL1	1.15689	3.17059	12.9973	9.67049e-34	1.77038e-32	65.5753
DEPDC1	1.15689	1.19944	11.0364	1.20872e-25	1.25424e-24	47.064
GJB3	1.15539	1.6238	5.84318	8.92817e-09	2.51035e-08	8.7715
HOXB7	1.1542	2.408	6.58451	1.09626e-10	3.63662e-10	13.0656
P4HB	1.15393	7.80446	14.0077	3.54148e-38	8.51996e-37	75.7307
LRRC15	1.15362	1.83942	6.6206	8.75295e-11	2.92512e-10	13.2859
CLDN6	1.15357	1.25233	4.33984	1.70677e-05	3.51025e-05	1.47908
ALDOA	1.15305	7.57022	11.4177	3.69288e-27	4.27279e-26	50.5245
DTYMK	1.15122	3.6049	12.7895	7.54108e-33	1.298e-31	63.5343
PLEKHA6	1.15106	2.72483	8.47831	2.25824e-16	1.19051e-15	25.9378
GSDMB	1.15006	2.22945	9.37951	1.89688e-19	1.26732e-18	32.9337
ANO9	1.14833	2.52158	8.9686	5.1047e-18	3.03735e-17	29.6792
DUS1L	1.14696	4.11342	13.5083	5.77729e-36	1.22408e-34	70.6649
JSRP1	1.14686	1.4287	8.05976	5.06541e-15	2.39853e-14	22.871
LOXL2	1.14675	2.88277	7.5779	1.56816e-13	6.62166e-13	19.492
C17orf53	1.14645	1.42271	11.8815	4.83335e-29	6.39949e-28	54.8281
CEMIP	1.14596	2.55618	6.321	5.50148e-10	1.72138e-09	11.4886
CCT5	1.14536	5.13514	12.1714	3.05707e-30	4.4422e-29	57.5693
SPC25	1.14451	1.58129	11.2948	1.14551e-26	1.27588e-25	49.4013
DSG2	1.14213	4.67359	8.6141	8.02987e-17	4.37126e-16	26.9581
H1F0	1.13915	6.90597	11.6719	3.47269e-28	4.34633e-27	52.8706
LYPD1	1.13859	1.19715	8.72294	3.47547e-17	1.94459e-16	27.7848
HIST1H3H	1.13835	1.65598	8.05641	5.19034e-15	2.45559e-14	22.847
SNRPE	1.13741	4.99499	15.1893	1.49955e-43	4.95773e-42	88.0392
NCAPG2	1.13703	2.17833	11.3906	4.74379e-27	5.45846e-26	50.276
ZNF217	1.13562	3.75042	11.4382	3.05735e-27	3.5547e-26	50.7119
C4orf48	1.13439	2.64712	8.40079	4.05311e-16	2.08925e-15	25.3608
ITM2C	1.13331	5.57268	9.56016	4.31771e-20	3.01878e-19	34.3976
FAM136A	1.13303	3.92542	17.6055	5.16618e-55	2.914e-53	114.317
CNOT11	1.13202	4.7475	18.4408	4.37159e-59	3.06673e-57	123.658
FOXA1	1.13167	4.00205	7.5383	2.06414e-13	8.64599e-13	19.2218
FUT8	1.13151	3.16094	11.1242	5.44998e-26	5.77732e-25	47.854
GCLC	1.1307	2.8897	6.04649	2.78845e-09	8.1907e-09	9.90489
CREB3L4	1.12977	3.10899	11.2919	1.17672e-26	1.30977e-25	49.3747
PDCD2L	1.12492	2.61093	13.6651	1.17763e-36	2.58027e-35	72.2462
DTL	1.1248	1.84278	11.1997	2.73807e-26	2.95316e-25	48.5368
MSMB	1.12293	3.15235	2.85143	0.0045212	0.00705212	-3.74121
MYO19	1.12249	2.10717	15.2076	1.23472e-43	4.0984e-42	88.2326
VARS	1.12223	4.33002	13.4642	9.02293e-36	1.88781e-34	70.2217
PPP1R35	1.1218	3.81132	10.9501	2.63528e-25	2.67229e-24	46.291
AKR1C2	1.12132	2.4807	3.03438	0.00252801	0.00407095	-3.21137
NECTIN1	1.12095	2.64418	9.35839	2.25223e-19	1.49648e-18	32.7639
ORC6	1.12087	1.26935	12.9082	2.3383e-33	4.15764e-32	64.6979
APOBEC3B	1.1203	1.88909	7.51839	2.36916e-13	9.87898e-13	19.0862
CDCA4	1.12002	2.90235	11.3199	9.10257e-27	1.02066e-25	49.6294
CDA	1.11975	2.89446	4.71961	3.02454e-06	6.72764e-06	3.13555
ATP6V1C2	1.1189	1.48453	7.73694	5.14184e-14	2.2556e-13	20.589
MIF	1.11856	5.11641	8.32105	7.36718e-16	3.72283e-15	24.7714
JPT2	1.11784	5.01574	15.0453	6.92179e-43	2.18462e-41	86.5172
SHCBP1	1.11636	1.56318	11.8111	9.39339e-29	1.21859e-27	54.1685
SLC16A3	1.11495	4.09449	8.3497	5.94655e-16	3.02879e-15	24.9827
BYSL	1.11442	3.46965	12.9324	1.84026e-33	3.30732e-32	64.9359
E2F3	1.11423	2.61461	14.692	2.88064e-41	8.33538e-40	82.8074
SIX4	1.11423	1.68267	11.8765	5.06843e-29	6.68952e-28	54.781
POLR2H	1.11361	3.99462	15.4332	1.11072e-44	3.8959e-43	90.6295
CCNF	1.11238	1.82826	13.1762	1.62935e-34	3.15222e-33	67.3453
COL9A2	1.11229	2.43891	6.4918	1.94545e-10	6.31684e-10	12.5046
MRPL12	1.11062	4.33332	9.59621	3.2062e-20	2.26633e-19	34.6921
CNTD2	1.11034	1.12651	8.18373	2.04097e-15	9.96375e-15	23.7668
IRF7	1.11031	4.13087	9.67678	1.64392e-20	1.18663e-19	35.353
SKA1	1.11026	1.28466	10.7775	1.23925e-24	1.20154e-23	44.7561
NARF	1.10907	3.22311	15.4601	8.31946e-45	2.94283e-43	90.9171
SLC39A4	1.109	3.22193	8.75802	2.64893e-17	1.49515e-16	28.0529
PHKA1	1.10874	2.13863	14.0977	1.40092e-38	3.46001e-37	76.6531
BAIAP2L1	1.10721	4.12781	12.2534	1.39129e-30	2.06848e-29	58.3511
STRA6	1.10701	1.10645	7.99835	7.91559e-15	3.68643e-14	22.4313
CLDN4	1.10686	6.29459	8.82668	1.55328e-17	8.91799e-17	28.58
KIFC2	1.10685	2.1326	8.59732	9.13014e-17	4.9573e-16	26.8314
PMAIP1	1.10683	2.85045	7.23464	1.63632e-12	6.34022e-12	17.1874
NGEF	1.10683	1.31253	8.6206	7.63965e-17	4.16427e-16	27.0073
GMDS	1.10591	2.81079	11.2896	1.20204e-26	1.33528e-25	49.3535
DNAJC22	1.10586	1.21734	8.83547	1.45038e-17	8.35307e-17	28.6477
KNTC1	1.10574	1.65357	12.1271	4.67336e-30	6.70906e-29	57.1478
MMP7	1.1055	4.13159	4.28811	2.13987e-05	4.36444e-05	1.26347
IDH2	1.10501	5.54422	11.0233	1.36138e-25	1.40654e-24	46.9461
BCL9	1.10392	3.01946	12.2185	1.94666e-30	2.86105e-29	58.0175
SERPINH1	1.10239	5.66735	11.594	7.18977e-28	8.7813e-27	52.1483
CBX2	1.10175	1.60601	8.41012	3.77843e-16	1.95369e-15	25.43
HILPDA	1.10051	3.26103	7.45207	3.74111e-13	1.5328e-12	18.6371
GNL3	1.09971	4.57653	15.6134	1.60525e-45	5.8646e-44	92.5547
HSF4	1.09806	1.97909	7.85332	2.24834e-14	1.00991e-13	21.4032
HHIPL2	1.09767	1.0375	6.17275	1.33143e-09	4.03292e-09	10.6258
KCNK5	1.09716	3.69618	6.90244	1.45901e-11	5.21284e-11	15.0408
YDJC	1.09528	3.5813	11.1714	3.54524e-26	3.79431e-25	48.2806
RALGPS2	1.09471	2.07161	12.4993	1.29009e-31	2.05137e-30	60.7132
NT5E	1.09276	3.34668	5.69784	2.01041e-08	5.46674e-08	7.98213
PYCR3	1.0919	2.83305	11.6018	6.68637e-28	8.19044e-27	52.2204
CHEK1	1.09172	1.5838	11.5479	1.10429e-27	1.32833e-26	51.7224
TDRKH	1.09168	2.6988	13.0161	8.02166e-34	1.47988e-32	65.7611
TFB2M	1.09156	3.66188	15.3042	4.40854e-44	1.493e-42	89.2575
EPHB2	1.09073	1.67382	9.14461	1.26181e-18	7.92e-18	31.0603
DBN1	1.0904	4.23931	9.97084	1.39022e-21	1.08412e-20	37.7981
KRT18	1.09039	7.59626	8.92292	7.31344e-18	4.31925e-17	29.324
HIST1H1C	1.08993	5.75064	6.3325	5.13304e-10	1.60881e-09	11.5563
RAB5IF	1.08937	4.31816	11.3684	5.82159e-27	6.65279e-26	50.0729
UBD	1.08696	2.86161	5.45072	7.68493e-08	1.9822e-07	6.68057
MCM10	1.0867	1.15458	10.9006	4.11515e-25	4.11416e-24	45.8491
SMKR1	1.08648	1.56321	6.60237	9.80818e-11	3.2647e-10	13.1745
ILF2	1.08623	6.52913	13.9124	9.42847e-38	2.19245e-36	74.7569
AP1S1	1.08566	5.09227	12.5719	6.35715e-32	1.03248e-30	61.4163
SLC22A18AS	1.08543	1.49281	9.76932	7.59637e-21	5.61937e-20	36.117
TMEM63C	1.08451	1.11891	8.0429	5.72731e-15	2.6997e-14	22.75
TPI1	1.08343	7.45741	11.8799	4.90742e-29	6.48214e-28	54.813
SLC22A18	1.08319	2.74045	10.2049	1.87844e-22	1.55259e-21	39.7803
RACGAP1	1.08265	2.85637	9.80455	5.65457e-21	4.21844e-20	36.4092
FAM83H	1.0802	4.39079	10.0361	7.98179e-22	6.32182e-21	38.3475
ACHE	1.07883	1.80411	6.08623	2.21253e-09	6.55203e-09	10.1304
PPIF	1.07785	4.4355	13.5433	4.05423e-36	8.70044e-35	71.017
PDGFRL	1.07783	2.62647	8.51486	1.71174e-16	9.10167e-16	26.2111
HABP2	1.07725	2.02961	4.9445	1.02481e-06	2.38537e-06	4.17661
MAP7D2	1.0767	1.23705	7.48006	3.0863e-13	1.27483e-12	18.8263
GPI	1.07568	5.17891	12.3408	5.99212e-31	9.11983e-30	59.1877
POC1A	1.0749	2.19546	11.7751	1.3183e-28	1.68661e-27	53.832
ESRP1	1.07452	4.50614	12.7225	1.4577e-32	2.45588e-31	62.8794
GMNN	1.0736	2.86799	11.4463	2.83567e-27	3.30848e-26	50.7866
NAXE	1.07293	5.82324	11.0221	1.37609e-25	1.42085e-24	46.9354
CST2	1.07277	1.4921	6.62577	8.47478e-11	2.83614e-10	13.3175
SFRP2	1.07263	5.10398	4.34038	1.70268e-05	3.50313e-05	1.48137
ENTPD8	1.07202	1.0502	8.48399	2.16329e-16	1.14118e-15	25.9801
LAGE3	1.07164	4.38758	10.292	8.85459e-23	7.50438e-22	40.5253
EPHA10	1.07056	1.10815	11.9402	2.77109e-29	3.73114e-28	55.3804
MRPL15	1.07038	5.24664	11.2651	1.50501e-26	1.66188e-25	49.1305
SOX12	1.07019	2.82008	10.5516	9.173e-24	8.40162e-23	42.7718
CBX3	1.07008	5.38812	15.0468	6.81861e-43	2.15613e-41	86.5322
CCL20	1.06956	3.44377	4.13464	4.12981e-05	8.19581e-05	0.637927
HYOU1	1.06953	4.95208	10.9357	3.00196e-25	3.03211e-24	46.1619
HDHD3	1.06946	3.75382	11.9763	1.96779e-29	2.67761e-28	55.7203
HOXC10	1.06864	1.00599	5.47402	6.78662e-08	1.76028e-07	6.80109
DKC1	1.06789	4.11079	14.9321	2.29526e-42	7.0966e-41	85.3244
E2F1	1.06781	2.96853	8.36328	5.37161e-16	2.746e-15	25.083
CENPW	1.06775	2.93076	8.12358	3.17634e-15	1.5261e-14	23.3309
EXOSC5	1.06705	3.67268	11.1637	3.80156e-26	4.05824e-25	48.2113
COA6	1.06662	4.14155	11.1726	3.50616e-26	3.75972e-25	48.2916
DONSON	1.06567	2.26468	13.5246	4.90103e-36	1.04372e-34	70.8284
SDF2L1	1.06515	4.73604	9.77843	7.03865e-21	5.21603e-20	36.1925
RNASEH2A	1.06513	3.31793	10.6467	3.96203e-24	3.71421e-23	43.6039
MELTF	1.06455	1.45717	7.66238	8.69174e-14	3.74014e-13	20.0724
PRRX2	1.06451	1.81243	6.63765	7.86715e-11	2.64339e-10	13.3903
DECR2	1.06446	2.56115	12.7132	1.5957e-32	2.67757e-31	62.7896
TFF3	1.06345	4.36789	3.04558	0.00243733	0.00393517	-3.17791
GFPT1	1.06323	4.30653	12.9113	2.26845e-33	4.04205e-32	64.728
INHA	1.06315	1.06284	4.87997	1.40409e-06	3.22546e-06	3.87336
POLE2	1.06246	1.44219	11.6728	3.44272e-28	4.31205e-27	52.8792
ISG15	1.06226	5.92627	5.49561	6.04596e-08	1.57478e-07	6.91316
HORMAD1	1.06211	1.09718	6.15169	1.50747e-09	4.54719e-09	10.5047
HNF4G	1.06178	1.15541	9.76659	7.77174e-21	5.74146e-20	36.0944
TUBG1	1.05963	4.09632	11.7092	2.44776e-28	3.08204e-27	53.2178
MCM7	1.05853	4.55432	9.89458	2.65064e-21	2.02448e-20	37.1592
PAK1	1.05828	3.72491	14.1393	9.12286e-39	2.27336e-37	77.0797
WNT3	1.05809	1.59824	11.6477	4.35639e-28	5.41581e-27	52.6456
ADGRF1	1.05777	1.98899	5.01392	7.27475e-07	1.72258e-06	4.50693
PTGFRN	1.05691	3.76123	10.7473	1.62174e-24	1.5606e-23	44.4894
TRIM2	1.05527	3.40725	7.89409	1.67899e-14	7.62165e-14	21.6907
CHTF18	1.05468	1.78735	11.0051	1.60446e-25	1.64951e-24	46.7831
STK32A	1.05456	1.67977	8.77029	2.40851e-17	1.3636e-16	28.1469
TRAP1	1.05407	3.52659	15.7087	5.75604e-46	2.16936e-44	93.5755
MSTO1	1.05384	2.13357	15.8514	1.23403e-46	4.88233e-45	95.1084
KIF22	1.05358	3.50051	13.0087	8.63769e-34	1.58827e-32	65.6875
RAB15	1.05334	3.45785	7.71253	6.10883e-14	2.66718e-13	20.4194
NOXA1	1.05252	2.97371	7.75289	4.59347e-14	2.02142e-13	20.7
ARSE	1.05221	2.66331	5.0016	7.73333e-07	1.82728e-06	4.44799
CHAF1B	1.05077	1.66423	13.1566	1.9803e-34	3.80473e-33	67.1514
ENC1	1.05024	3.87053	8.87742	1.04495e-17	6.08526e-17	28.9715
DCAF13	1.04969	2.66498	14.0573	2.12536e-38	5.18787e-37	76.2385
PAQR4	1.04779	2.54686	10.3813	4.07536e-23	3.56615e-22	41.2941
ALG3	1.04776	3.94167	13.3177	3.94433e-35	7.9727e-34	68.7553
ESPL1	1.04738	1.17697	10.6584	3.57041e-24	3.36218e-23	43.7071
MRPL3	1.04692	4.98802	15.7354	4.31426e-46	1.6483e-44	93.8625
CDC25C	1.045	1.08059	12.1316	4.47739e-30	6.4388e-29	57.1903
PCSK1N	1.0449	2.19163	4.75827	2.51868e-06	5.64909e-06	3.31136
HGH1	1.04452	3.60031	11.9742	2.00743e-29	2.72932e-28	55.7005
F12	1.0437	1.25479	10.1338	3.46199e-22	2.80589e-21	39.1747
CPD	1.04321	4.38656	7.89934	1.61695e-14	7.34999e-14	21.7278
TSPAN6	1.04294	3.80362	10.899	4.17377e-25	4.17028e-24	45.8351
COL6A3	1.04287	4.80736	6.81348	2.58508e-11	9.07305e-11	14.4802
KDELR2	1.0418	6.47883	14.2348	3.39482e-39	8.64023e-38	78.0629
SRM	1.04151	4.95468	11.7822	1.2333e-28	1.58393e-27	53.8982
HIST1H2BK	1.04042	5.84348	7.14833	2.91169e-12	1.10636e-11	16.6216
RAD51	1.03941	1.47126	11.5302	1.30201e-27	1.56055e-26	51.559
MRPL24	1.03879	5.06585	11.7478	1.70423e-28	2.16051e-27	53.5772
NIPSNAP1	1.03803	4.6087	12.2068	2.17749e-30	3.18907e-29	57.9062
PFN2	1.03661	4.25215	5.93659	5.25192e-09	1.50741e-08	9.28804
ATP1B1	1.03618	7.33679	7.24923	1.4837e-12	5.76226e-12	17.2835
CKAP4	1.03599	5.23604	11.3364	7.82037e-27	8.83416e-26	49.78
ARHGAP11A	1.03561	1.63628	10.1063	4.38249e-22	3.52627e-21	38.9412
ATAD3A	1.0341	3.12297	11.749	1.68546e-28	2.13833e-27	53.5881
EIF2AK1	1.0336	5.39523	16.2672	1.34941e-48	5.96025e-47	99.6038
GRTP1	1.03348	2.29747	11.8681	5.48539e-29	7.21134e-28	54.7025
STIL	1.03257	1.29422	12.8034	6.57802e-33	1.14284e-31	63.6701
BLACAT1	1.03241	1.19952	10.3512	5.2959e-23	4.57899e-22	41.0345
CBX4	1.03087	3.87897	13.5851	2.653e-36	5.73764e-35	71.4386
BRIX1	1.03073	3.12696	12.4005	3.36277e-31	5.22278e-30	59.7615
NSMF	1.03008	3.39124	10.4111	3.14367e-23	2.76683e-22	41.5512
PCNA	1.02854	5.69666	10.448	2.27605e-23	2.02671e-22	41.8713
GLB1L2	1.02852	2.3853	8.13529	2.91495e-15	1.40375e-14	23.4155
BATF	1.02849	3.57207	7.89508	1.66714e-14	7.56993e-14	21.6977
CYP27B1	1.02809	1.41429	10.5426	9.9304e-24	9.06495e-23	42.6932
CALCA	1.02658	1.22866	2.80854	0.00515951	0.00798213	-3.86083
KRT81	1.02486	1.11359	4.48493	8.94041e-06	1.89886e-05	2.09674
HDGF	1.02296	6.59418	13.0317	6.87631e-34	1.27563e-32	65.9142
MIS18A	1.02278	2.91799	12.3541	5.26999e-31	8.05748e-30	59.3153
RUSC1	1.02178	3.34568	13.4781	7.84353e-36	1.6514e-34	70.3609
DTX2	1.0216	3.00746	10.1373	3.3612e-22	2.72818e-21	39.204
KCNK1	1.02143	3.24739	6.92789	1.23743e-11	4.44973e-11	15.2023
RAB25	1.02066	6.08396	9.12164	1.51596e-18	9.45126e-18	30.8789
NFE2L3	1.02022	3.23346	8.11476	3.38864e-15	1.62157e-14	23.2672
PDIA6	1.0199	6.00743	11.2243	2.18649e-26	2.37976e-25	48.76
DARS2	1.01963	3.25814	12.2402	1.57995e-30	2.33648e-29	58.2248
SMOC1	1.01859	1.36216	4.79161	2.14879e-06	4.84616e-06	3.46402
TRIM31	1.01826	1.13944	6.40192	3.37143e-10	1.07177e-09	11.9671
SIX2	1.01798	1.25198	6.09118	2.14951e-09	6.37332e-09	10.1586
GARS	1.01761	4.89937	12.8579	3.84351e-33	6.75487e-32	64.204
TM4SF4	1.01676	1.31673	3.69901	0.00023893	0.000435738	-1.02062
PPIL1	1.0166	4.29122	11.869	5.43708e-29	7.15347e-28	54.7113
CILP	1.01593	1.52756	6.09215	2.13747e-09	6.33987e-09	10.1641
CGREF1	1.01419	1.04098	7.83505	2.56175e-14	1.14422e-13	21.2747
LIMK1	1.01301	3.69165	10.3445	5.61525e-23	4.84007e-22	40.9765
PABPC1	1.01225	8.14606	11.2549	1.65147e-26	1.81401e-25	49.0384
COL7A1	1.01125	1.24444	7.13045	3.27869e-12	1.24045e-11	16.5051
TMEM156	1.01059	1.42231	7.96211	1.02884e-14	4.75172e-14	22.173
VPREB3	1.0104	1.54108	7.0269	6.48947e-12	2.39074e-11	15.8352
ICA1	1.01028	3.30308	11.4108	3.93738e-27	4.54623e-26	50.4609
CHPF2	1.00988	4.57823	13.6156	1.94749e-36	4.23377e-35	71.746
IER3	1.00859	5.58046	6.42122	2.99755e-10	9.57839e-10	12.0819
MMP17	1.00808	1.28372	8.45994	2.5949e-16	1.35856e-15	25.8007
FIGNL1	1.00801	1.99308	11.5819	8.05048e-28	9.79671e-27	52.0361
OIP5	1.00574	1.37497	10.2836	9.52569e-23	8.04456e-22	40.4529
ADGRF4	1.00548	1.00416	7.46914	3.32714e-13	1.36991e-12	18.7524
TMED3	1.00504	2.9028	12.4163	2.88662e-31	4.51688e-30	59.9132
HKDC1	1.00386	2.22387	6.67458	6.23953e-11	2.11395e-10	13.6172
LRRC20	1.00198	3.06946	11.1967	2.81425e-26	3.02945e-25	48.5096
SAA1	1.00155	2.97053	3.78086	0.000173976	0.000322209	-0.722293
FOXP3	1.00135	1.52006	11.2821	1.2876e-26	1.42559e-25	49.2853
BPIFA2	1.00066	1.03224	5.18886	3.01362e-07	7.39246e-07	5.35779
CD27	1.00016	2.60475	6.80611	2.70975e-11	9.49265e-11	14.4341
HMBS	0.998792	2.83421	12.5348	9.12642e-32	1.46797e-30	61.057
MTFR1	0.998697	3.03243	10.9198	3.46236e-25	3.4761e-24	46.0204
KIF14	0.996854	1.02281	11.0526	1.04354e-25	1.08758e-24	47.2097
GALE	0.996159	4.20737	9.94357	1.75172e-21	1.3559e-20	37.5692
LY6K	0.995085	1.14028	5.73793	1.60979e-08	4.41693e-08	8.19815
NEIL3	0.994799	1.00009	8.87169	1.09293e-17	6.35581e-17	28.9272
CLK2	0.993834	3.7459	12.2859	1.01816e-30	1.52733e-29	58.6612
NLN	0.993017	2.06137	15.5043	5.18359e-45	1.85322e-43	91.388
MRM1	0.993003	2.40832	13.5095	5.70776e-36	1.21089e-34	70.6769
RPP40	0.991031	1.89192	12.9425	1.66555e-33	3.00864e-32	65.035
TNFRSF17	0.990335	1.70562	6.69469	5.49706e-11	1.87037e-10	13.7413
GSDMC	0.989993	1.36226	6.91436	1.35072e-11	4.84148e-11	15.1164
ATAD3B	0.989737	2.03608	10.5014	1.42638e-23	1.28382e-22	42.3343
HOXB9	0.98965	0.921671	4.84467	1.66561e-06	3.80477e-06	3.70898
CSTF2	0.9885	3.35711	15.0433	7.07046e-43	2.22733e-41	86.4961
MTMR11	0.987629	2.51405	8.3419	6.304e-16	3.20498e-15	24.9251
ZP3	0.987519	1.50709	9.68031	1.59628e-20	1.15325e-19	35.3821
MAGEA3	0.987368	0.900018	4.10469	4.68422e-05	9.23901e-05	0.51832
HIST1H4I	0.98698	3.12381	8.30247	8.46246e-16	4.25442e-15	24.6348
GLB1L3	0.986436	0.967355	5.63636	2.81956e-08	7.56838e-08	7.65352
TUBA1C	0.985999	4.62518	9.99265	1.15518e-21	9.05063e-21	37.9814
RGS17	0.985616	1.03209	9.32483	2.95744e-19	1.9509e-18	32.4945
OPLAH	0.984829	2.70776	8.37429	4.94596e-16	2.53695e-15	25.1644
SLC12A7	0.984825	4.59587	8.72543	3.40914e-17	1.90875e-16	27.8038
RCC2	0.983688	5.26093	12.6061	4.55279e-32	7.45961e-31	61.7479
CCT6A	0.983649	5.65083	11.2882	1.21784e-26	1.35193e-25	49.3406
SLC35B2	0.983324	5.21504	12.7563	1.04534e-32	1.78638e-31	63.2098
KCNQ3	0.983001	1.5993	8.37851	4.79155e-16	2.46001e-15	25.1957
CLDN12	0.982826	3.38627	11.5959	7.06097e-28	8.63662e-27	52.1663
MX2	0.982338	2.26624	8.94316	6.23765e-18	3.69566e-17	29.4812
ITGA2	0.982086	3.29514	5.5369	4.84155e-08	1.27078e-07	7.12867
DAP	0.981817	6.12839	11.6535	4.12339e-28	5.12996e-27	52.7001
MDFI	0.981073	2.94414	6.45324	2.46495e-10	7.94188e-10	12.2732
PLPP5	0.980663	3.67861	10.8079	9.44082e-25	9.23939e-24	45.0258
RAB26	0.979862	1.03868	9.69939	1.36195e-20	9.89386e-20	35.5392
MRGBP	0.979365	3.17777	13.3689	2.35697e-35	4.82255e-34	69.2671
GMPPA	0.978802	3.40783	16.2308	2.00707e-48	8.72656e-47	99.2086
KDM5B	0.978773	3.32998	13.3666	2.41332e-35	4.93181e-34	69.2436
NAT9	0.978759	3.269	13.857	1.66231e-37	3.81236e-36	74.193
XRCC2	0.978657	1.06841	11.5028	1.67982e-27	1.99618e-26	51.3062
NUDT8	0.978636	2.55252	9.43828	1.17448e-19	7.96468e-19	33.4078
BHMT2	0.977936	1.62632	4.60534	5.15689e-06	1.12138e-05	2.62362
RBBP8NL	0.977489	1.36762	11.7827	1.22741e-28	1.57758e-27	53.903
S100A16	0.977091	6.49665	6.07813	2.31963e-09	6.85193e-09	10.0843
ECE2	0.977026	1.38874	12.4834	1.50481e-31	2.38146e-30	60.5603
PIAS3	0.976779	3.62435	12.0684	8.18898e-30	1.15184e-28	56.5908
ELMO3	0.976756	3.97975	8.90171	8.63867e-18	5.06786e-17	29.1595
CDCA2	0.976647	1.11597	10.9501	2.63612e-25	2.67229e-24	46.2907
TBRG4	0.976242	3.45667	13.2194	1.05777e-34	2.06557e-33	67.7747
KCNE4	0.974112	1.85645	5.70949	1.88492e-08	5.1389e-08	8.04477
PDCD6	0.972771	3.70252	13.1742	1.66183e-34	3.21134e-33	67.3257
POU2AF1	0.970147	1.76178	6.7314	4.35874e-11	1.49832e-10	13.9685
TRIB3	0.969592	3.20015	8.10757	3.57195e-15	1.70783e-14	23.2152
HPRT1	0.969487	4.38433	10.6513	3.80209e-24	3.57029e-23	43.6447
SERPINB5	0.969477	1.08863	4.78768	2.18952e-06	4.93669e-06	3.44596
NCCRP1	0.969224	1.21296	5.26964	1.98894e-07	4.95779e-07	5.75963
FBXL19	0.9691	2.67064	11.3565	6.49944e-27	7.38697e-26	49.9636
SPINT2	0.968027	6.57974	9.30132	3.57769e-19	2.35077e-18	32.3062
NUP155	0.967832	2.61334	10.9322	3.09611e-25	3.12153e-24	46.1312
CDH1	0.96769	6.00361	9.20304	7.90061e-19	5.03276e-18	31.523
RHOD	0.967434	4.06071	7.5486	1.92201e-13	8.06888e-13	19.2919
FBXL6	0.967128	2.86487	10.302	8.11632e-23	6.90673e-22	40.6115
CCNL2	0.966478	4.03904	7.67569	7.91629e-14	3.41702e-13	20.1644
MMP10	0.966186	1.18453	5.25297	2.16801e-07	5.38647e-07	5.67623
DNA2	0.964351	1.3216	11.7125	2.37385e-28	2.99123e-27	53.2482
BNIP3	0.963185	3.90421	8.78697	2.1159e-17	1.20324e-16	28.2748
B4GALT3	0.962794	4.12742	13.9728	5.06737e-38	1.20348e-36	75.3744
SCRIB	0.962527	4.12652	8.47694	2.28194e-16	1.20149e-15	25.9275
MAGED1	0.962232	5.34868	11.0739	8.60357e-26	8.99469e-25	47.4012
NPW	0.962215	0.980708	5.47406	6.78522e-08	1.76019e-07	6.80129
SYNJ2	0.961141	1.83981	12.6649	2.56337e-32	4.267e-31	62.3186
SELENOI	0.961124	2.73986	11.3327	8.09088e-27	9.12123e-26	49.7463
CRELD2	0.960866	3.42759	10.9108	3.75282e-25	3.76319e-24	45.9405
FAM241B	0.96085	3.18601	10.8501	6.47116e-25	6.37418e-24	45.4002
ABCA12	0.960838	0.901083	8.70905	3.86912e-17	2.15761e-16	27.6789
NOP2	0.960794	3.26513	11.8715	5.31067e-29	6.99818e-28	54.7346
CNPY2	0.959926	3.51178	13.4941	6.67147e-36	1.40996e-34	70.5218
ERN2	0.959504	1.44688	4.53833	7.01515e-06	1.50527e-05	2.32882
KIAA1522	0.958857	5.08044	10.5999	5.9894e-24	5.54933e-23	43.1943
IKBKE	0.958831	2.54386	12.7536	1.07308e-32	1.83192e-31	63.1838
C11orf24	0.958693	3.89222	12.6996	1.82368e-32	3.05092e-31	62.6569
TARS2	0.958497	3.36242	14.2461	3.02168e-39	7.71407e-38	78.1787
KLK12	0.958392	1.19047	3.33634	0.000908154	0.00154783	-2.26746
ANP32E	0.958359	4.83299	8.05869	5.10492e-15	2.41587e-14	22.8634
KPNA7	0.957866	1.37602	8.64176	6.49517e-17	3.56136e-16	27.1675
FAM3C	0.957378	4.08467	8.53448	1.47454e-16	7.88813e-16	26.3583
AIMP2	0.957307	3.56261	12.4055	3.20529e-31	4.99212e-30	59.8092
BPIFB2	0.957161	1.18595	3.75101	0.000195446	0.000360094	-0.831797
TTC39C	0.956345	2.19506	9.23082	6.31899e-19	4.05776e-18	31.7439
NSUN2	0.956285	4.15265	11.7685	1.4023e-28	1.78724e-27	53.7707
MMP14	0.955641	5.84354	6.96854	9.50201e-12	3.45032e-11	15.4613
IL20RB	0.955094	1.19323	5.49789	5.97224e-08	1.5563e-07	6.92506
CHEK2	0.954806	2.00106	10.9265	3.25976e-25	3.28257e-24	46.0802
ZC3HAV1L	0.953695	1.83017	11.3739	5.53621e-27	6.34838e-26	50.1227
PUSL1	0.953679	2.66845	11.6668	3.64092e-28	4.54326e-27	52.8237
GPR37	0.953551	1.27353	6.74974	3.88033e-11	1.33994e-10	14.0823
LGI2	0.953416	1.24664	7.64144	1.00654e-13	4.31123e-13	19.9281
PFDN6	0.953339	3.64118	11.9486	2.55973e-29	3.45771e-28	55.4592
ACAD8	0.951759	2.89515	8.41851	3.54721e-16	1.83812e-15	25.4923
CDK5RAP3	0.951526	4.13697	9.58793	3.43335e-20	2.41972e-19	34.6243
P4HA3	0.951354	1.28184	10.218	1.67916e-22	1.3941e-21	39.8913
MZT2A	0.951134	2.71831	11.5536	1.04784e-27	1.26316e-26	51.7745
SMOX	0.950567	2.23225	8.01658	6.93512e-15	3.24793e-14	22.5615
APBA2	0.950377	1.58254	7.33177	8.5003e-13	3.37585e-12	17.8307
PUS7	0.949664	2.4649	12.3545	5.2509e-31	8.03566e-30	59.3189
PKIB	0.949521	1.84297	6.36953	4.10377e-10	1.29496e-09	11.775
HSPA5	0.948974	7.81749	13.1982	1.30746e-34	2.54718e-33	67.564
SLC44A5	0.948739	1.24866	6.91823	1.31736e-11	4.72697e-11	15.1409
MRPL9	0.948645	4.76178	13.1293	2.60058e-34	4.94525e-33	66.8806
NME2	0.94778	4.47997	8.70793	3.90253e-17	2.17334e-16	27.6704
IVL	0.947691	1.09639	4.66445	3.91849e-06	8.61964e-06	2.88699
SORD	0.947583	2.13754	10.8676	5.53526e-25	5.47492e-24	45.5551
RHNO1	0.946836	3.71324	14.5987	7.66567e-41	2.14024e-39	81.8337
COL18A1	0.946288	4.30798	6.77353	3.33555e-11	1.15877e-10	14.2305
TMEM62	0.946067	3.3112	12.4494	2.09462e-31	3.28991e-30	60.2318
NXPH4	0.94601	1.02535	5.84899	8.63991e-09	2.43381e-08	8.80343
ZNF239	0.945317	1.64478	11.6431	4.54585e-28	5.64294e-27	52.6033
GDF15	0.944778	4.60363	4.43074	1.14065e-05	2.39191e-05	1.86384
FKBP4	0.944434	4.30062	9.20113	8.02249e-19	5.10261e-18	31.5079
CCHCR1	0.944107	2.63663	11.1724	3.51288e-26	3.76451e-25	48.2897
EXOSC4	0.943957	3.88813	9.46289	9.60301e-20	6.57368e-19	33.6069
DDX11	0.943911	1.8592	10.22	1.65016e-22	1.3707e-21	39.9086
SRD5A1	0.943733	2.01503	10.2742	1.03265e-22	8.66392e-22	40.3729
SLC5A6	0.943442	2.76605	13.5963	2.36882e-36	5.13635e-35	71.5513
DSCC1	0.94303	1.70357	9.35838	2.25243e-19	1.49648e-18	32.7638
HSP90B1	0.942998	7.68924	10.988	1.87273e-25	1.91705e-24	46.6298
PYGO2	0.942706	4.4394	14.4429	3.90504e-40	1.05499e-38	80.214
FKBP3	0.940059	4.37886	11.686	3.04427e-28	3.82159e-27	53.0013
CABLES2	0.940052	2.30117	11.0989	6.85891e-26	7.22501e-25	47.626
KIF15	0.939428	1.13808	10.9098	3.78833e-25	3.79424e-24	45.9312
SPATS2	0.938819	2.46429	13.7501	4.95405e-37	1.10727e-35	73.1071
MRPL36	0.937909	3.73422	10.5291	1.11771e-23	1.01543e-22	42.576
KRTCAP2	0.936635	3.00336	12.6235	3.84414e-32	6.32333e-31	61.916
GRB7	0.936511	3.59293	8.22265	1.53092e-15	7.5555e-15	24.0503
CCDC137	0.935487	3.5146	11.543	1.15603e-27	1.38957e-26	51.677
NUP210	0.935247	3.46699	8.35859	5.56342e-16	2.84145e-15	25.0484
HIST1H3D	0.932861	1.11365	7.06291	5.1224e-12	1.90561e-11	16.0673
SGPL1	0.932518	3.88473	13.1873	1.45815e-34	2.82756e-33	67.4556
COCH	0.932471	1.01928	6.93351	1.19317e-11	4.29704e-11	15.238
WDHD1	0.93212	1.61312	10.44	2.44265e-23	2.16698e-22	41.8012
INTS8	0.931363	2.64778	13.6731	1.08627e-36	2.38636e-35	72.3265
CAD	0.931037	3.0294	10.3584	4.97574e-23	4.31558e-22	41.0963
CDH24	0.930646	1.94915	8.61504	7.97246e-17	4.34143e-16	26.9652
HID1	0.930476	3.71255	8.27627	1.02847e-15	5.14575e-15	24.4425
MESP1	0.930424	1.24852	8.89112	9.3866e-18	5.49312e-17	29.0775
TMEM92	0.929933	2.64834	7.60104	1.33472e-13	5.65885e-13	19.6505
LPGAT1	0.929225	3.54797	11.2814	1.29574e-26	1.43364e-25	49.2791
PARP1	0.929118	4.66488	12.2324	1.70292e-30	2.51388e-29	58.1504
GPX8	0.928938	2.80765	7.96178	1.03131e-14	4.76185e-14	22.1707
TMEM79	0.928303	2.06289	12.3603	4.96501e-31	7.64016e-30	59.3745
SLC39A7	0.927755	6.26087	11.2204	2.26489e-26	2.46349e-25	48.7251
CENPH	0.927173	2.0609	10.975	2.10505e-25	2.1496e-24	46.5138
PLEKHG6	0.926978	1.80152	8.70444	4.00927e-17	2.23055e-16	27.6437
MYO7A	0.926932	1.32144	12.3234	7.09198e-31	1.07643e-29	59.0204
PLK4	0.926831	1.38199	10.5103	1.31886e-23	1.18897e-22	42.412
PSMB4	0.926802	6.68544	11.5607	9.81001e-28	1.18515e-26	51.8399
EPHB3	0.926483	2.64473	7.48117	3.06264e-13	1.266e-12	18.8338
SEC61G	0.92641	5.04633	10.7888	1.1202e-24	1.08801e-23	44.8562
SFRP4	0.923862	3.59976	4.6418	4.35485e-06	9.54055e-06	2.78571
EFNA5	0.923697	2.53842	7.34689	7.67127e-13	3.06118e-12	17.9315
CALU	0.923427	5.76395	9.45697	1.008e-19	6.88324e-19	33.5589
PDZD11	0.92341	4.76587	12.3708	4.48418e-31	6.91301e-30	59.4757
ABCA4	0.923372	1.087	5.55582	4.37109e-08	1.15255e-07	7.22786
UQCC3	0.922599	3.16291	9.92285	2.08746e-21	1.60609e-20	37.3956
PFDN2	0.92126	6.11407	10.214	1.73743e-22	1.4389e-21	39.8576
FANCG	0.921152	2.41609	11.8988	4.10214e-29	5.46603e-28	54.991
TMEM106C	0.921086	4.34357	9.16753	1.05035e-18	6.64012e-18	31.2416
OTX1	0.920515	0.980044	11.6301	5.1339e-28	6.3446e-27	52.4826
PKM	0.920488	7.11106	10.8387	7.1704e-25	7.05462e-24	45.2985
SRPRB	0.920194	4.23544	12.7383	1.24714e-32	2.1118e-31	63.0344
KLK6	0.920126	0.875781	4.50828	8.04327e-06	1.71486e-05	2.19791
TCF3	0.919756	3.692	11.3028	1.06489e-26	1.18688e-25	49.4737
EIF3B	0.919246	4.6418	11.6564	4.01499e-28	4.99882e-27	52.7266
EPHX4	0.917891	1.14523	8.80403	1.85299e-17	1.05805e-16	28.4058
DAP3	0.917322	4.64031	15.37	2.18359e-44	7.56373e-43	89.9567
KLHL17	0.916816	1.81039	10.223	1.60768e-22	1.33608e-21	39.9344
ATAT1	0.915131	2.11899	11.2121	2.44496e-26	2.649e-25	48.6492
LRRC59	0.914843	5.34464	13.2191	1.05997e-34	2.06743e-33	67.7726
UGT8	0.91361	1.55435	6.23981	8.94579e-10	2.75062e-09	11.0139
CBX8	0.913374	1.91508	14.0555	2.16468e-38	5.27612e-37	76.2203
ISYNA1	0.913329	3.59641	7.12939	3.30172e-12	1.24888e-11	16.4983
EMB	0.913088	3.92725	6.30007	6.23896e-10	1.94049e-09	11.3658
SLC35A2	0.912866	4.16643	10.9527	2.57541e-25	2.61552e-24	46.3138
NR2F6	0.912722	4.38718	9.78082	6.89904e-21	5.1194e-20	36.2123
CKS2	0.912657	5.13878	6.72299	4.59719e-11	1.57607e-10	13.9163
AHCY	0.912415	5.28587	10.2277	1.54311e-22	1.28434e-21	39.975
RPL22L1	0.911981	3.43023	8.43682	3.08991e-16	1.60764e-15	25.6284
TWNK	0.910617	2.21226	12.799	6.86653e-33	1.18925e-31	63.6274
FRMD5	0.909827	0.94147	10.9233	3.35382e-25	3.36916e-24	46.052
MARVELD3	0.909392	1.85943	12.6746	2.33126e-32	3.89227e-31	62.4129
DDIT4	0.909054	5.44004	5.58378	3.75619e-08	9.94502e-08	7.37502
ADAMTS12	0.908217	1.63616	7.95824	1.05803e-14	4.8825e-14	22.1455
DHTKD1	0.907993	3.24021	11.4888	1.91342e-27	2.2641e-26	51.1769
LRIG3	0.905945	3.10625	6.06838	2.45526e-09	7.24513e-09	10.0289
DPY19L1	0.905812	3.96853	7.85704	2.18932e-14	9.83928e-14	21.4294
FOXO6	0.905762	1.28922	7.69958	6.69208e-14	2.91574e-13	20.3297
ERV3-1	0.90495	2.74402	5.88687	6.9722e-09	1.97905e-08	9.01217
CASP6	0.904887	3.71181	12.7497	1.11585e-32	1.90104e-31	63.145
DIRAS1	0.904395	1.15469	7.10917	3.77484e-12	1.42172e-11	16.3668
CCDC34	0.904333	1.92084	9.84655	3.97348e-21	2.99915e-20	36.7584
PRKDC	0.904293	3.73138	8.79341	2.01258e-17	1.14643e-16	28.3242
RCOR2	0.904218	1.13833	7.52086	2.32895e-13	9.72347e-13	19.1031
SLC25A13	0.903953	3.28881	11.7605	1.5119e-28	1.92251e-27	53.696
NABP2	0.902102	3.95344	12.3072	8.28544e-31	1.25416e-29	58.8659
KRT19	0.901979	7.84334	5.27332	1.95144e-07	4.87014e-07	5.77804
BPHL	0.901721	2.06186	12.643	3.17552e-32	5.26499e-31	62.1058
SLC1A4	0.901609	2.79939	9.6681	1.7669e-20	1.27101e-19	35.2816
ADAMTS14	0.901154	1.0816	10.0661	6.18097e-22	4.9306e-21	38.6007
EME1	0.901117	1.05217	11.1741	3.45904e-26	3.71157e-25	48.305
SMUG1	0.900908	2.84893	13.5652	3.24792e-36	6.99706e-35	71.2375
SLC12A8	0.900855	2.24201	9.48095	8.28237e-20	5.69298e-19	33.7532
CANT1	0.900371	4.65241	11.0751	8.51151e-26	8.90402e-25	47.4119
ALDH1B1	0.900046	3.6014	9.3809	1.87543e-19	1.25399e-18	32.9449
BACE2	0.899811	3.11096	5.94344	5.0501e-09	1.45198e-08	9.32621
HELLS	0.89967	1.17156	10.9943	1.76901e-25	1.8131e-24	46.6863
EDN2	0.899249	1.57198	5.14915	3.6892e-07	8.98146e-07	5.16234
OSTC	0.898987	5.83682	11.8139	9.15306e-29	1.18926e-27	54.1942
PDIA3	0.89818	7.16223	9.59108	3.3452e-20	2.35959e-19	34.6501
PAX9	0.897122	1.21575	6.47114	2.20885e-10	7.13878e-10	12.3804
MCRIP2	0.896843	2.69051	9.64734	2.09931e-20	1.50494e-19	35.1111
CELSR3	0.894372	0.96261	9.52356	5.83673e-20	4.04189e-19	34.0994
SPTB	0.894263	1.07779	6.18586	1.23221e-09	3.74463e-09	10.7014
PDK1	0.893136	1.5221	11.1036	6.57268e-26	6.92787e-25	47.6683
CLCF1	0.892827	3.03493	6.63335	8.08212e-11	2.71289e-10	13.3639
MRTO4	0.89282	3.98141	12.1695	3.11302e-30	4.51956e-29	57.5513
INCENP	0.892721	2.47269	9.62141	2.60266e-20	1.85543e-19	34.8984
TFAP2C	0.892507	2.74287	7.51	2.51044e-13	1.04498e-12	19.0293
STEAP2	0.892329	2.04071	6.55423	1.32308e-10	4.35447e-10	12.8816
MYL6B	0.891759	3.30262	10.2986	8.36246e-23	7.10532e-22	40.5819
LMNB2	0.890576	3.69173	8.71666	3.64814e-17	2.0371e-16	27.7369
MAPK8IP3	0.890172	2.64878	7.28952	1.13113e-12	4.44674e-12	17.55
MCTS1	0.889948	3.66858	14.1123	1.20467e-38	2.98858e-37	76.8032
LOXL1	0.889688	2.88313	7.6954	6.89195e-14	2.9989e-13	20.3007
NDUFS6	0.889644	5.24481	9.08001	2.11225e-18	1.29894e-17	30.5511
AGMAT	0.889371	1.07694	11.1715	3.54074e-26	3.79193e-25	48.2818
AP1G2	0.889049	2.85928	9.4419	1.14026e-19	7.73891e-19	33.437
ZMYND19	0.888812	3.0523	12.7897	7.52576e-33	1.2967e-31	63.5363
TRIM47	0.887011	3.79215	8.02122	6.70516e-15	3.14553e-14	22.5947
SGO1	0.886865	0.956024	11.0786	8.24593e-26	8.6316e-25	47.4433
SLC26A6	0.886535	1.92587	10.18	2.32893e-22	1.91589e-21	39.5673
CLDN2	0.886449	1.97335	3.14683	0.00174286	0.00286745	-2.86992
EPRS	0.885722	4.91596	12.8	6.80235e-33	1.17936e-31	63.6367
TCF19	0.885623	2.79157	9.01324	3.58776e-18	2.16172e-17	30.0276
PUS1	0.885452	2.23339	11.8225	8.43483e-29	1.09936e-27	54.2753
CACNB3	0.885085	2.48946	9.18652	9.02059e-19	5.72435e-18	31.392
IL23A	0.885051	1.39581	8.47697	2.28128e-16	1.20149e-15	25.9278
POLG2	0.884999	2.0505	12.1799	2.8201e-30	4.11217e-29	57.6494
ADAM15	0.884879	4.95754	9.15574	1.15436e-18	7.27288e-18	31.1482
BRI3BP	0.884249	2.38087	11.0846	7.80955e-26	8.20052e-25	47.4972
LEMD1	0.883789	1.10485	7.24106	1.56732e-12	6.07711e-12	17.2297
IGFBPL1	0.883689	1.29364	6.70447	5.16812e-11	1.76384e-10	13.8017
SPATA20	0.883366	3.69055	9.23898	5.91724e-19	3.81003e-18	31.8088
CHD1L	0.883084	4.20392	11.5612	9.7632e-28	1.18035e-26	51.8447
NETO2	0.88217	1.9466	8.45445	2.705e-16	1.4131e-15	25.7597
CLDN9	0.881747	1.56086	5.22194	2.54376e-07	6.28263e-07	5.52165
TMTC4	0.881742	2.34547	11.5165	1.47841e-27	1.76437e-26	51.4329
PSMD4	0.881735	5.6839	11.6029	6.6146e-28	8.11443e-27	52.2311
PROC	0.881674	0.941094	6.78005	3.19994e-11	1.11398e-10	14.2712
DDX39A	0.881665	3.85476	10.4421	2.3967e-23	2.12848e-22	41.8201
PGAM5	0.881195	3.70082	10.7368	1.78096e-24	1.70694e-23	44.3965
VTCN1	0.881173	1.30008	4.81331	1.93677e-06	4.39532e-06	3.5639
OLA1	0.880986	3.76478	12.9364	1.76967e-33	3.18387e-32	64.9747
COA4	0.880934	4.35701	12.2289	1.76058e-30	2.5944e-29	58.1173
CHMP4C	0.88052	3.74808	9.22939	6.39239e-19	4.10174e-18	31.7324
RASD1	0.88045	4.68112	3.57788	0.000378009	0.000674854	-1.45069
MSRB1	0.880009	4.5615	7.38951	5.73998e-13	2.31541e-12	18.2164
NSUN5	0.879551	3.23813	11.8171	8.8812e-29	1.15483e-27	54.2241
TRAF2	0.878177	3.13417	9.8819	2.95002e-21	2.2439e-20	37.0532
MFSD3	0.877289	3.35053	7.5037	2.62211e-13	1.08821e-12	18.9865
HAPLN3	0.876721	2.40086	7.50494	2.59976e-13	1.0792e-12	18.9949
DDX56	0.876269	4.29748	13.9537	6.1677e-38	1.45652e-36	75.179
ABCB6	0.876199	1.3102	10.0247	8.79317e-22	6.94141e-21	38.2516
SCUBE3	0.876122	1.32843	6.01266	3.39192e-09	9.90409e-09	9.71395
CYC1	0.875985	5.62392	8.21241	1.65142e-15	8.13097e-15	23.9756
VPS72	0.874933	3.71154	11.9598	2.30248e-29	3.11525e-28	55.5644
XPO5	0.874534	2.91716	12.0204	1.29418e-29	1.78281e-28	56.1364
PSPH	0.874405	2.68925	8.14481	2.71804e-15	1.31347e-14	23.4845
C1orf56	0.874324	2.37381	10.1513	2.98012e-22	2.42594e-21	39.3231
RUNX2	0.874198	1.57966	9.7676	7.70614e-21	5.69804e-20	36.1028
HCAR1	0.874183	1.17961	6.23779	9.05404e-10	2.78288e-09	11.0022
RRS1	0.873978	3.86925	9.24589	5.59699e-19	3.61079e-18	31.8638
SPOCK1	0.87384	1.13134	6.04946	2.74078e-09	8.05918e-09	9.9217
QPRT	0.873706	3.22125	4.47511	9.34542e-06	1.97984e-05	2.05437
CENPK	0.873339	1.1916	10.2762	1.01535e-22	8.53587e-22	40.3897
DIO2	0.873101	1.16252	7.28657	1.15388e-12	4.533e-12	17.5305
RNF43	0.873004	2.47215	7.9227	1.36697e-14	6.25457e-14	21.8932
HIST1H2AI	0.872958	0.889179	7.4292	4.37642e-13	1.78129e-12	18.483
CAPN8	0.872068	3.60944	4.26614	2.35405e-05	4.78258e-05	1.17258
CIP2A	0.871829	1.38129	9.08166	2.08477e-18	1.28393e-17	30.564
EPS8L1	0.871731	2.78161	6.6535	7.12328e-11	2.40263e-10	13.4876
CAPN12	0.871483	1.36485	8.47563	2.30469e-16	1.2127e-15	25.9177
GORASP2	0.871262	4.86769	15.7789	2.70084e-46	1.04868e-44	94.3287
MSI2	0.87104	2.14421	11.8664	5.5724e-29	7.31997e-28	54.6869
SLC2A5	0.870698	1.06077	9.26459	4.81363e-19	3.12474e-18	32.0129
ACTL6A	0.870435	3.92631	10.9959	1.74395e-25	1.78962e-24	46.7005
CLPTM1L	0.870184	5.25039	9.19266	8.58703e-19	5.45752e-18	31.4407
MTX2	0.869978	4.48428	14.8144	7.95424e-42	2.39286e-40	84.0878
AC136428.1	0.869973	1.20948	5.90111	6.43013e-09	1.83141e-08	9.09096
POLB	0.869825	2.81882	9.90539	2.41949e-21	1.85301e-20	37.2495
CPSF1	0.869209	4.08653	8.8625	1.17438e-17	6.8176e-17	28.8562
IGF2BP3	0.868823	0.904173	6.60948	9.38242e-11	3.1261e-10	13.2179
TPD52	0.868776	3.71426	9.03793	2.95047e-18	1.79196e-17	30.2208
HIST1H2AC	0.868774	4.67218	5.73551	1.63163e-08	4.47318e-08	8.18505
ADSSL1	0.86861	1.68959	7.68089	7.63277e-14	3.3049e-13	20.2003
BOLA1	0.868596	3.43611	9.369	2.06607e-19	1.37815e-18	32.8492
JAK3	0.867628	2.21957	8.85494	1.24589e-17	7.21267e-17	28.7978
DSN1	0.867476	3.09562	10.3615	4.84481e-23	4.20639e-22	41.1227
TRPT1	0.867461	3.45975	11.5637	9.53906e-28	1.15492e-26	51.8677
DUSP23	0.867092	5.69152	6.70918	5.01648e-11	1.71419e-10	13.8308
FEZF1	0.866184	0.809833	6.59405	1.03302e-10	3.43093e-10	13.1238
C12orf45	0.865936	2.89162	12.9672	1.30418e-33	2.37714e-32	65.2781
MRPS34	0.865668	5.70842	10.4247	2.79229e-23	2.46407e-22	41.6687
PLPP4	0.865502	0.874548	7.51302	2.45866e-13	1.02424e-12	19.0498
WDR86	0.864683	1.27706	6.62018	8.77597e-11	2.93106e-10	13.2833
TAF1D	0.86452	3.06238	11.3355	7.88005e-27	8.88955e-26	49.7725
CLSPN	0.864336	1.03591	9.66609	1.79661e-20	1.29183e-19	35.2651
MRPS12	0.864155	3.83278	8.86454	1.15575e-17	6.71181e-17	28.872
MAGEA6	0.864082	0.786158	3.86857	0.000123039	0.000232066	-0.39576
CCDC58	0.863153	2.98587	11.1605	3.91501e-26	4.17402e-25	48.1822
STRIP2	0.861861	1.15933	7.1353	3.17483e-12	1.20224e-11	16.5367
GRHL1	0.861599	1.74639	7.73489	5.21674e-14	2.28606e-13	20.5747
SMYD5	0.861353	3.47649	15.337	3.10551e-44	1.06467e-42	89.6062
WDR46	0.861317	4.12284	13.7555	4.69227e-37	1.05016e-35	73.1611
MMP15	0.86094	4.25908	6.65457	7.07531e-11	2.38838e-10	13.4942
OAS1	0.860789	3.88057	6.03507	2.97934e-09	8.73298e-09	9.84035
SEMA4C	0.860748	3.47956	9.81038	5.3847e-21	4.0243e-20	36.4576
C1orf53	0.860422	2.63491	7.82333	2.78511e-14	1.24e-13	21.1924
GCAT	0.860235	2.76411	7.87005	1.99475e-14	9.00363e-14	21.521
SNRNP25	0.860137	3.27461	11.3311	8.20798e-27	9.247e-26	49.732
DBF4	0.859931	1.84777	10.8513	6.40579e-25	6.31353e-24	45.4103
GLMP	0.85981	4.20119	10.7992	1.02055e-24	9.95279e-24	44.9486
ATP10B	0.859808	0.808023	6.78451	3.11029e-11	1.08389e-10	14.299
SLAMF7	0.859376	2.97218	5.55796	4.32088e-08	1.13967e-07	7.23908
FUT6	0.859183	0.907659	6.05571	2.64303e-09	7.78273e-09	9.9571
RGS14	0.858604	2.8102	9.96301	1.48574e-21	1.1543e-20	37.7323
PERP	0.858588	5.69828	7.47739	3.14357e-13	1.29766e-12	18.8082
HOOK1	0.858484	2.67115	9.80249	5.75305e-21	4.28808e-20	36.3921
TNC	0.85822	4.17997	3.81666	0.000151161	0.000281483	-0.589881
SNRPA1	0.857843	3.09938	12.7757	8.63644e-33	1.48043e-31	63.3995
DLG5	0.857502	2.32864	9.4998	7.09549e-20	4.89126e-19	33.9062
PDXDC1	0.857223	4.16584	11.8825	4.78751e-29	6.34383e-28	54.8376
HM13	0.856933	4.4024	14.3086	1.5796e-39	4.12079e-38	78.8239
ALG8	0.856538	3.57161	13.0476	5.86663e-34	1.09318e-32	66.072
RASGEF1A	0.856342	1.34657	7.79627	3.37675e-14	1.49664e-13	21.0028
PRTFDC1	0.856341	2.19436	8.25558	1.19941e-15	5.9617e-15	24.2909
ELF3	0.856309	5.27729	6.81959	2.48585e-11	8.73185e-11	14.5186
TWF1	0.855486	4.04092	10.2787	9.9378e-23	8.36298e-22	40.4109
TARS	0.855105	4.08955	9.82753	4.66255e-21	3.49713e-20	36.6001
CXCL9	0.854518	4.20012	3.54382	0.000429064	0.000760795	-1.56916
SPSB1	0.854509	4.08566	8.80854	1.78907e-17	1.02261e-16	28.4405
METTL26	0.853833	4.66998	8.84964	1.29856e-17	7.50719e-17	28.7569
FLVCR1	0.853251	2.10761	10.6187	5.07608e-24	4.72146e-23	43.3583
NFATC4	0.852491	2.29657	8.48694	2.11537e-16	1.11696e-15	26.0022
DOLPP1	0.851937	3.42454	13.528	4.73369e-36	1.01066e-34	70.863
RCCD1	0.851389	1.76514	13.0878	3.93266e-34	7.41917e-33	66.4695
RHPN2	0.851228	2.78643	6.77523	3.29962e-11	1.14772e-10	14.2411
CHML	0.85075	2.50005	6.89612	1.51983e-11	5.42434e-11	15.0008
SP5	0.850264	1.36089	5.75614	1.45467e-08	4.0078e-08	8.29666
RDH10	0.85007	3.92942	4.9858	8.36194e-07	1.96774e-06	4.37264
SLC4A11	0.8497	1.51456	6.00097	3.62869e-09	1.05659e-08	9.6482
YBX2	0.849614	0.821388	7.00405	7.53673e-12	2.75811e-11	15.6885
URB1	0.848615	2.46742	10.3177	7.08816e-23	6.0596e-22	40.7457
COASY	0.848397	4.40671	13.0071	8.77755e-34	1.61044e-32	65.6716
PIP5KL1	0.84822	1.69325	7.6766	7.86601e-14	3.39795e-13	20.1707
BEAN1	0.84787	0.997959	8.48605	2.12975e-16	1.12384e-15	25.9956
RPUSD1	0.847596	3.18043	9.95369	1.60785e-21	1.24685e-20	37.6541
EMC9	0.847527	2.96567	9.82235	4.86978e-21	3.64928e-20	36.5571
TRAF5	0.847176	1.86758	9.38068	1.87892e-19	1.25582e-18	32.9431
CENPI	0.847153	0.996198	10.5158	1.25658e-23	1.13651e-22	42.4599
HIST1H2BH	0.846548	0.899968	5.89051	6.82946e-09	1.93986e-08	9.0323
OXLD1	0.846355	3.70604	9.47926	8.39738e-20	5.76966e-19	33.7396
AVL9	0.846015	2.59246	11.4893	1.90367e-27	2.25417e-26	51.182
SOX2	0.845861	2.24939	3.70013	0.000237905	0.000433915	-1.01658
SYT13	0.845549	0.958966	4.39916	1.31313e-05	2.73845e-05	1.72933
TGFA	0.844982	2.74219	5.73909	1.5995e-08	4.39015e-08	8.20438
FANCA	0.844767	1.26431	11.7954	1.08939e-28	1.4056e-27	54.0214
BCL2L12	0.844703	2.96726	10.176	2.40948e-22	1.97976e-21	39.5337
RANBP1	0.844581	3.69211	10.6523	3.76851e-24	3.54274e-23	43.6535
CHRNA5	0.84457	0.903984	7.88254	1.82405e-14	8.25768e-14	21.6091
ENO3	0.843825	1.38813	5.38308	1.09969e-07	2.79883e-07	6.3333
HEATR1	0.843721	2.57037	12.2735	1.14713e-30	1.7131e-29	58.5427
SUV39H2	0.843507	1.85311	12.1129	5.35419e-30	7.62744e-29	57.0128
ARHGAP39	0.843471	2.06416	8.95916	5.49934e-18	3.26634e-17	29.6056
CENPE	0.843464	1.02284	9.83216	4.48437e-21	3.36873e-20	36.6387
YWHAZ	0.842993	6.70487	11.0486	1.0819e-25	1.12685e-24	47.1739
RTKN	0.842559	3.06882	11.6168	5.8107e-28	7.14399e-27	52.3597
TUBA4A	0.842277	4.3101	7.06205	5.15177e-12	1.91568e-11	16.0617
DNAAF5	0.84189	2.82592	12.3962	3.50743e-31	5.43733e-30	59.7197
CHST15	0.841787	3.51037	7.82054	2.84101e-14	1.26354e-13	21.1729
TIMM17A	0.841615	4.13686	13.7446	5.24061e-37	1.16663e-35	73.0512
MAST2	0.841291	3.00293	10.7416	1.70521e-24	1.63716e-23	44.4396
NCAPD2	0.84124	3.62792	8.45832	2.62696e-16	1.37362e-15	25.7886
LYPLA2	0.840988	5.26167	10.0642	6.28075e-22	5.00781e-21	38.5848
PSMB3	0.840556	6.57325	9.22614	6.56168e-19	4.20391e-18	31.7066
MRPL17	0.840549	4.50178	11.7767	1.29894e-28	1.66312e-27	53.8467
PDCD5	0.840181	4.28979	10.3307	6.32916e-23	5.43579e-22	40.8579
RAB34	0.839966	4.82007	9.92288	2.08709e-21	1.60609e-20	37.3958
MCM3	0.839839	4.65484	9.59298	3.29284e-20	2.32364e-19	34.6657
LPAR2	0.839817	2.78755	11.17	3.59004e-26	3.8398e-25	48.2681
LAMP5	0.839231	1.65749	6.86915	1.80843e-11	6.41053e-11	14.8304
STIP1	0.839	5.21899	11.352	6.77044e-27	7.6793e-26	49.9231
GOT1	0.838756	4.40675	8.37037	5.09355e-16	2.60945e-15	25.1354
TMEM69	0.838465	3.51962	14.6739	3.48399e-41	9.94338e-40	82.6182
RHBDD3	0.838257	3.01349	10.055	6.79183e-22	5.40755e-21	38.5074
CTTN	0.838025	5.38123	10.816	8.78338e-25	8.62124e-24	45.0973
HS3ST1	0.837211	1.73772	7.20148	2.04311e-12	7.86107e-12	16.9694
NDUFAF8	0.836985	3.50791	11.2564	1.63008e-26	1.79169e-25	49.0513
BMF	0.836853	3.08582	8.0857	4.19163e-15	1.99554e-14	23.0576
SRPK3	0.836575	0.930347	8.21988	1.56261e-15	7.70508e-15	24.0301
P3H1	0.836082	2.75258	11.7384	1.86211e-28	2.3535e-27	53.4892
FASTK	0.834913	4.28687	9.61632	2.71485e-20	1.93211e-19	34.8566
UQCRH	0.834743	6.01805	9.96613	1.44686e-21	1.12619e-20	37.7585
IL2RA	0.834644	1.74871	7.1761	2.42035e-12	9.25353e-12	16.8031
ARFGAP1	0.834473	3.91987	9.72391	1.11019e-20	8.13329e-20	35.7415
OVOL1	0.83408	1.07303	9.25303	5.28396e-19	3.41942e-18	31.9207
STAP2	0.834068	3.47704	8.59247	9.47491e-17	5.13614e-16	26.7948
C17orf58	0.834042	2.9186	10.3884	3.83146e-23	3.35977e-22	41.3552
F2RL1	0.833638	3.055	5.69374	2.05643e-08	5.58461e-08	7.96014
FBXO41	0.8335	1.36133	10.0498	7.09946e-22	5.6471e-21	38.4635
LYPLA1	0.833125	4.31591	8.07112	4.66237e-15	2.21459e-14	22.9527
PTRH2	0.832995	2.50364	13.9494	6.44524e-38	1.51991e-36	75.1352
PLXNA3	0.832482	2.66879	8.18673	1.99621e-15	9.76808e-15	23.7887
ENTPD7	0.832259	2.25724	9.83079	4.5364e-21	3.40556e-20	36.6273
DPH2	0.832158	3.2744	12.4078	3.13483e-31	4.89151e-30	59.8312
C11orf86	0.831596	0.751066	5.3671	1.1962e-07	3.03661e-07	6.25181
ERCC6L	0.831095	0.886699	11.3074	1.02106e-26	1.14108e-25	49.5154
MGME1	0.830807	3.22557	12.1331	4.41311e-30	6.35184e-29	57.2047
POP7	0.830365	4.63369	8.98765	4.39232e-18	2.62941e-17	29.8277
IARS2	0.830225	5.13284	12.2316	1.71528e-30	2.52989e-29	58.1432
TRAIP	0.829966	1.26013	12.5239	1.01534e-31	1.62066e-30	60.9511
UBFD1	0.829216	3.10501	13.2543	7.45248e-35	1.46903e-33	68.1228
SKP2	0.828948	2.40518	7.90393	1.56444e-14	7.11715e-14	21.7603
STYXL1	0.828721	4.16587	10.8041	9.76576e-25	9.54062e-24	44.9922
BSPRY	0.828656	3.78211	8.32729	7.03169e-16	3.56193e-15	24.8174
SHC1	0.828502	5.26199	9.7811	6.88256e-21	5.10943e-20	36.2147
ZBTB12	0.827886	2.02262	9.02002	3.40034e-18	2.05399e-17	30.0806
CDK4	0.827385	4.52608	8.29602	8.87912e-16	4.45584e-15	24.5874
FAM114A1	0.827219	4.09257	10.6089	5.53516e-24	5.13988e-23	43.2725
IL1RL2	0.8271	1.05197	10.6952	2.57614e-24	2.44521e-23	44.0306
ANAPC11	0.826914	4.17252	8.70314	4.04965e-17	2.25226e-16	27.6338
TMED2	0.826824	6.5673	10.7502	1.57945e-24	1.52167e-23	44.5156
TXNRD1	0.826391	5.0391	4.42524	1.16906e-05	2.44932e-05	1.84034
WFDC10B	0.826099	1.19633	6.22186	9.95377e-10	3.04709e-09	10.9097
NOP58	0.825671	4.44078	13.4322	1.24621e-35	2.5976e-34	69.9006
ZNF138	0.825508	2.07465	11.4159	3.75687e-27	4.34382e-26	50.5075
E2F2	0.825173	1.03979	10.518	1.23299e-23	1.11759e-22	42.4787
KIF12	0.824904	1.89032	4.9673	9.16114e-07	2.14432e-06	4.28465
ZNF146	0.824723	4.49468	10.2635	1.13298e-22	9.49138e-22	40.2811
NUP85	0.82463	3.2035	12.9611	1.38514e-33	2.51646e-32	65.2182
DPP3	0.824069	4.03205	10.8571	6.07865e-25	6.00527e-24	45.4623
C8orf76	0.82377	2.21543	10.8521	6.35613e-25	6.27199e-24	45.418
DCTPP1	0.82353	4.41327	9.09723	1.84166e-18	1.13714e-17	30.6866
CDH17	0.823063	0.850536	4.39438	1.34131e-05	2.79338e-05	1.70905
SAC3D1	0.82257	2.70257	9.76515	7.86603e-21	5.80854e-20	36.0825
SEM1	0.822428	3.00223	11.2061	2.58283e-26	2.79113e-25	48.5948
EIF6	0.822197	6.20815	10.1184	3.95072e-22	3.19116e-21	39.0439
PTGES2	0.82117	3.84241	10.7458	1.64311e-24	1.58026e-23	44.4764
MRPL58	0.820764	4.39165	11.1419	4.63945e-26	4.93692e-25	48.0138
GAMT	0.820597	2.76057	6.67014	6.4163e-11	2.17163e-10	13.5899
ANKZF1	0.81974	2.90235	10.8794	4.97815e-25	4.94439e-24	45.6603
ERBB2	0.819401	4.81134	6.90026	1.47966e-11	5.28324e-11	15.027
SPINT1	0.819097	6.14674	8.21162	1.66109e-15	8.17617e-15	23.9699
FAT1	0.818638	3.16997	6.18705	1.22358e-09	3.72044e-09	10.7082
ENTPD6	0.818446	4.17995	10.1286	3.62011e-22	2.9312e-21	39.1305
LYSMD1	0.818417	2.44826	10.9767	2.07389e-25	2.11908e-24	46.5286
CYBC1	0.818117	3.81941	12.3873	3.82389e-31	5.91145e-30	59.6339
CACYBP	0.817567	4.02204	11.421	3.5816e-27	4.14978e-26	50.5549
NPTX1	0.817341	1.14953	4.06254	5.58519e-05	0.000109244	0.35142
CARD14	0.816994	0.881483	7.81878	2.87675e-14	1.2791e-13	21.1606
JTB	0.816875	6.72158	10.7923	1.08555e-24	1.05559e-23	44.8873
TUBB2A	0.81686	3.14601	5.92976	5.46104e-09	1.56474e-08	9.25002
DGAT1	0.816179	3.78669	8.63927	6.62076e-17	3.62546e-16	27.1486
SLC9A3R1	0.815795	4.664	7.11764	3.5691e-12	1.34727e-11	16.4218
TNNC2	0.81544	1.92299	3.39917	0.000726548	0.00125095	-2.06023
SLC41A2	0.815302	2.78183	8.14266	2.76133e-15	1.33246e-14	23.4689
SCAMP5	0.815239	1.96721	8.18654	1.99913e-15	9.77949e-15	23.7873
CKAP2	0.815147	2.57233	9.21021	7.45816e-19	4.75636e-18	31.58
CENPX	0.815012	4.59454	7.38341	5.98377e-13	2.40851e-12	18.1756
GPR35	0.814671	1.13936	6.34583	4.73647e-10	1.48793e-09	11.6349
TIMM8A	0.813758	1.87944	13.9572	5.94801e-38	1.40663e-36	75.215
BDH1	0.813721	1.68491	10.2255	1.57364e-22	1.30844e-21	39.9556
MTFP1	0.813629	1.95534	10.7718	1.30372e-24	1.26258e-23	44.7058
RNF207	0.813345	1.44403	8.57823	1.05642e-16	5.69334e-16	26.6874
CTSK	0.813072	4.90027	5.1909	2.9823e-07	7.31921e-07	5.36789
CBR3	0.812704	2.51828	5.25105	2.18964e-07	5.43616e-07	5.66663
NUDT1	0.812678	2.84741	9.3722	2.01305e-19	1.34386e-18	32.8749
HCN3	0.812086	1.28531	10.3052	7.89387e-23	6.72429e-22	40.6391
SLC35B1	0.81198	3.63018	14.0165	3.23461e-38	7.79295e-37	75.8208
NMNAT2	0.811945	1.22971	5.0731	5.41473e-07	1.29854e-06	4.79182
TMEM8A	0.811074	4.83862	9.2205	6.86654e-19	4.39416e-18	31.6617
C1orf112	0.810839	1.27118	13.2835	5.56462e-35	1.11e-33	68.4132
XPOT	0.810638	3.80327	9.55319	4.57333e-20	3.18948e-19	34.3407
SDHAF3	0.809769	2.80296	9.8504	3.8466e-21	2.90865e-20	36.7905
IFITM1	0.809453	6.47672	4.85418	1.59082e-06	3.6414e-06	3.75319
KLHL23	0.809031	2.31792	8.79129	2.046e-17	1.16507e-16	28.308
GART	0.808863	3.25307	12.9284	1.91396e-33	3.42871e-32	64.8968
PLOD1	0.808665	4.97192	9.50144	7.00057e-20	4.83181e-19	33.9195
PITX2	0.808588	0.725139	6.23008	9.47899e-10	2.90868e-09	10.9574
SNRPC	0.807979	5.77288	10.2799	9.83109e-23	8.27735e-22	40.4216
FANCF	0.807908	2.46097	14.3576	9.48933e-40	2.50687e-38	79.3308
CDC25A	0.80713	1.03176	10.1399	3.28668e-22	2.67029e-21	39.2262
GJB6	0.806804	0.787297	5.27096	1.97545e-07	4.92638e-07	5.76621
DCUN1D5	0.806508	3.82067	10.8045	9.73185e-25	9.51306e-24	44.9957
FANCD2	0.806489	1.41832	12.0373	1.10182e-29	1.533e-28	56.2961
SIRT7	0.805805	2.56064	11.6252	5.37519e-28	6.62318e-27	52.437
MORC2	0.805685	3.23539	13.1465	2.19164e-34	4.19148e-33	67.0506
HOMER3	0.805572	2.84621	7.84166	2.44363e-14	1.09351e-13	21.3212
BLOC1S4	0.804236	3.4794	11.8106	9.4343e-29	1.22199e-27	54.1642
RSRP1	0.803909	2.86364	6.65363	7.1171e-11	2.4014e-10	13.4884
CBR1	0.803644	5.10107	4.39088	1.36233e-05	2.8361e-05	1.6942
MGST1	0.803589	5.03814	6.11761	1.84165e-09	5.50549e-09	10.3094
VWA1	0.803094	4.85218	7.11595	3.60922e-12	1.36149e-11	16.4109
SNRPG	0.802239	4.49862	8.92312	7.30197e-18	4.314e-17	29.3256
SLC5A3	0.800505	2.29769	7.07359	4.77468e-12	1.78181e-11	16.1363
TTLL12	0.800503	3.59096	8.38886	4.43332e-16	2.28101e-15	25.2723
RFWD3	0.800202	2.75535	11.9186	3.40071e-29	4.55684e-28	55.1772
APEX1	0.799839	6.18553	10.9256	3.28535e-25	3.30236e-24	46.0724
SLC20A1	0.79919	3.74427	8.32547	7.12778e-16	3.60732e-15	24.804
NDC1	0.798981	2.83665	9.93348	1.90794e-21	1.47204e-20	37.4847
NIFK	0.798781	4.02147	12.8848	2.94608e-33	5.19405e-32	64.4683
RPL37	0.798621	6.30292	8.83183	1.49211e-17	8.5875e-17	28.6197
JUP	0.798507	6.19668	7.39069	5.694e-13	2.29797e-12	18.2243
MAD2L2	0.798467	3.14533	8.84202	1.3781e-17	7.95427e-17	28.6982
POLR1C	0.79844	3.3661	12.001	1.55597e-29	2.13113e-28	55.9535
PIM2	0.798191	4.45018	5.86544	7.87291e-09	2.22375e-08	8.89391
DNAJB11	0.798158	3.84224	11.8118	9.3289e-29	1.21116e-27	54.1753
CEP85	0.797728	2.24522	11.2852	1.25194e-26	1.38886e-25	49.3132
CD2AP	0.797715	4.21131	9.38503	1.81351e-19	1.21308e-18	32.9781
GLRX3	0.797659	3.57905	11.2465	1.78503e-26	1.95428e-25	48.9613
MFSD9	0.797482	2.29785	12.951	1.53095e-33	2.77231e-32	65.1187
NSF	0.796883	3.6374	13.0074	8.752e-34	1.60752e-32	65.6745
P4HA1	0.796637	5.01684	8.17441	2.18605e-15	1.0644e-14	23.6992
TMEM54	0.796169	5.33865	7.13727	3.13358e-12	1.1877e-11	16.5496
RPS2	0.796139	8.23744	8.73315	3.21152e-17	1.80355e-16	27.8628
PPIB	0.796051	7.03116	8.40923	3.80381e-16	1.96499e-15	25.4234
FAM220A	0.79589	3.37249	11.4528	2.66946e-27	3.11892e-26	50.8465
ECM1	0.794963	3.71773	4.18002	3.40736e-05	6.81472e-05	0.820665
ACP6	0.794516	1.6319	11.8511	6.43976e-29	8.43942e-28	54.5433
ZNF512B	0.794396	3.09346	8.07979	4.37645e-15	2.07997e-14	23.0151
NOP56	0.794296	4.06789	10.1003	4.61142e-22	3.70689e-21	38.8908
WDR62	0.794074	1.03189	9.28818	3.9788e-19	2.60306e-18	32.2012
CCDC24	0.79404	2.32624	9.05157	2.64788e-18	1.61406e-17	30.3277
GINS4	0.793855	1.01502	9.4748	8.71059e-20	5.98239e-19	33.7034
TIMM17B	0.792514	4.12912	8.83637	1.44023e-17	8.30115e-17	28.6547
BLM	0.792004	1.08931	10.931	3.12962e-25	3.15342e-24	46.1206
CCDC86	0.791713	3.50307	9.7346	1.0154e-20	7.45849e-20	35.8298
LIF	0.791591	2.92406	4.53631	7.08008e-06	1.51842e-05	2.32
BET1	0.79146	2.79677	9.53702	5.22486e-20	3.63174e-19	34.2089
MSH2	0.791402	3.13487	9.86137	3.50736e-21	2.65814e-20	36.8819
NAA40	0.79105	2.63896	10.7908	1.09975e-24	1.06876e-23	44.8745
TMEM182	0.790846	1.3606	13.9932	4.10965e-38	9.85844e-37	75.5827
SPDL1	0.790549	1.70074	11.3556	6.55384e-27	7.44373e-26	49.9553
ROMO1	0.790179	6.12186	6.95871	1.013e-11	3.66797e-11	15.3985
DPY30	0.78982	4.07304	11.4304	3.28532e-27	3.8118e-26	50.6405
YIPF2	0.789769	4.4621	9.72615	1.08959e-20	7.99286e-20	35.76
GAL	0.789372	0.786192	4.9012	1.26637e-06	2.91995e-06	3.97275
ARHGEF39	0.78925	0.961828	12.18	2.81584e-30	4.10955e-29	57.6509
HMGN1	0.789217	4.90104	12.8481	4.23403e-33	7.41778e-32	64.1079
NOL3	0.788935	3.6918	8.19005	1.94793e-15	9.54022e-15	23.8128
UAP1	0.788839	4.45274	10.2158	1.71127e-22	1.41864e-21	39.8726
MARS	0.788411	4.01842	10.4747	1.80164e-23	1.60943e-22	42.1029
SMG5	0.787898	4.73084	10.2675	1.09499e-22	9.1777e-22	40.3149
CUL7	0.787715	3.6548	9.74817	9.06594e-21	6.66806e-20	35.942
KIF1A	0.787593	0.788575	4.08758	5.03192e-05	9.88737e-05	0.450369
DHX34	0.787467	2.40809	10.6921	2.64868e-24	2.5112e-23	44.0031
SEC24D	0.787206	3.29167	10.7281	1.92358e-24	1.83941e-23	44.3202
STMN1	0.787124	4.31183	6.1299	1.71349e-09	5.14077e-09	10.3797
OAT	0.787091	5.09189	6.72339	4.58562e-11	1.57307e-10	13.9188
SDS	0.786834	1.81263	5.92343	5.66208e-09	1.6204e-08	9.21482
CRABP1	0.786608	0.774921	4.8832	1.38226e-06	3.17793e-06	3.88844
HAVCR1	0.785808	0.745319	6.08359	2.24689e-09	6.64555e-09	10.1154
GGH	0.785631	2.74408	5.07541	5.35235e-07	1.28432e-06	4.803
ZNF117	0.785499	2.27967	5.66724	2.37983e-08	6.4294e-08	7.81822
DDOST	0.785385	6.7012	11.6308	5.09806e-28	6.30497e-27	52.4895
MS4A1	0.785316	1.41579	4.67172	3.78752e-06	8.34914e-06	2.91961
NR2C2AP	0.784631	3.37096	10.3557	5.09422e-23	4.41375e-22	41.073
PLAAT1	0.784092	0.959619	6.94339	1.11907e-11	4.04152e-11	15.3009
RPL36A	0.783917	4.07616	9.12735	1.44841e-18	9.05041e-18	30.9239
FARSB	0.783294	3.76957	12.8904	2.78812e-33	4.92326e-32	64.523
LRFN4	0.782959	2.44288	6.04386	2.83126e-09	8.31207e-09	9.89004
HDAC1	0.782862	5.00092	12.0432	1.04164e-29	1.45411e-28	56.3519
PARPBP	0.78249	1.09097	10.0532	6.90017e-22	5.4912e-21	38.4917
CR2	0.782429	1.28415	5.01101	7.38069e-07	1.74643e-06	4.49299
NOP16	0.782421	2.72627	10.6293	4.62018e-24	4.31424e-23	43.4516
MST1R	0.78194	3.01369	6.61622	8.99598e-11	3.00214e-10	13.2591
WDR45B	0.781814	5.31494	9.82948	4.58659e-21	3.4417e-20	36.6164
EGF	0.781671	1.10441	7.07396	4.76298e-12	1.77784e-11	16.1387
BAK1	0.781644	3.87447	9.67846	1.62102e-20	1.17061e-19	35.3669
TFG	0.780842	4.58098	11.7679	1.41133e-28	1.79737e-27	53.7643
GSS	0.780208	4.84034	11.0077	1.56692e-25	1.61191e-24	46.8066
STT3A	0.779985	4.6424	11.3501	6.8909e-27	7.80532e-26	49.9056
TMPRSS13	0.779983	2.52273	6.41466	3.11987e-10	9.95782e-10	12.0428
TMEM52	0.779577	1.17287	8.06346	4.93043e-15	2.33992e-14	22.8977
DDR1	0.779502	4.95472	8.16524	2.3388e-15	1.13613e-14	23.6326
PSMD14	0.778782	3.33642	11.3098	9.98713e-27	1.11759e-25	49.5374
TMEM159	0.778511	4.42407	6.78473	3.10598e-11	1.08262e-10	14.3004
TRIM27	0.778362	3.52921	14.8273	6.94282e-42	2.09237e-40	84.2231
C1orf35	0.77753	2.56555	11.0238	1.3552e-25	1.40101e-24	46.9506
CDC7	0.77744	1.79366	8.27448	1.04226e-15	5.21318e-15	24.4293
NOC2L	0.777429	4.06249	9.77366	7.32501e-21	5.42343e-20	36.153
SYVN1	0.777392	4.3674	10.9506	2.62373e-25	2.66296e-24	46.2954
PIGU	0.777146	3.63524	11.469	2.29895e-27	2.69924e-26	50.9948
CPOX	0.776456	2.88466	11.3583	6.39173e-27	7.27942e-26	49.9802
SKIV2L	0.775617	3.62858	11.872	5.28941e-29	6.97567e-28	54.7386
YKT6	0.775353	4.98253	10.2353	1.44604e-22	1.20535e-21	40.0394
GRHL2	0.775189	3.24277	9.41437	1.42775e-19	9.61586e-19	33.2146
ERFE	0.775018	0.887758	6.76898	3.43369e-11	1.19212e-10	14.2021
TSEN54	0.77501	3.56694	10.7628	1.41175e-24	1.36325e-23	44.6269
PSMC4	0.774991	5.21505	10.6389	4.24408e-24	3.97415e-23	43.5357
CEACAM6	0.774952	8.25337	2.86393	0.00434931	0.00680053	-3.70605
ZSCAN16	0.774876	2.62811	10.7816	1.19403e-24	1.15904e-23	44.7929
CADM4	0.774593	3.3583	6.2444	8.7046e-10	2.68091e-09	11.0406
ENTR1	0.774482	3.53038	12.7391	1.23843e-32	2.09918e-31	63.0414
PREB	0.7744	4.44105	12.5286	9.69476e-32	1.55339e-30	60.997
BUD23	0.774378	3.6492	12.2758	1.12117e-30	1.67734e-29	58.5655
CD19	0.774195	1.15838	6.2248	9.78133e-10	2.9976e-09	10.9267
TSFM	0.774013	3.27795	10.0047	1.04279e-21	8.18932e-21	38.0828
PDLIM4	0.773565	2.42335	4.99675	7.9214e-07	1.86828e-06	4.42482
MTX1	0.773534	2.80995	12.187	2.63334e-30	3.84993e-29	57.7175
C5orf34	0.773304	1.08957	10.2871	9.23795e-23	7.81738e-22	40.4833
FBLIM1	0.77324	3.7188	8.02356	6.59217e-15	3.09426e-14	22.6115
IDH1	0.773161	5.06447	7.70255	6.55352e-14	2.85686e-13	20.3503
PERM1	0.771652	0.837209	11.2363	1.9593e-26	2.13947e-25	48.8688
RPN2	0.770987	7.26728	10.5144	1.27169e-23	1.14893e-22	42.4481
SINHCAF	0.770282	3.60879	7.64911	9.53924e-14	4.09007e-13	19.9809
CNP	0.768942	3.9055	12.365	4.74127e-31	7.30261e-30	59.4203
HYLS1	0.768728	1.59676	11.6282	5.22655e-28	6.45242e-27	52.4648
KDF1	0.768657	3.61022	10.2443	1.33796e-22	1.11693e-21	40.1164
GAREM2	0.768652	1.13493	8.76273	2.5539e-17	1.44347e-16	28.089
KCTD13	0.768365	2.19061	11.0395	1.17505e-25	1.22007e-24	47.092
SOWAHB	0.768089	2.02817	7.38135	6.06829e-13	2.44077e-12	18.1618
NMRAL1	0.767786	3.71393	11.4041	4.18937e-27	4.8305e-26	50.3993
NELFCD	0.767602	3.81095	11.0339	1.2361e-25	1.28107e-24	47.0418
WDR75	0.767137	3.11199	13.9152	9.1614e-38	2.13332e-36	74.7855
E2F5	0.766894	1.78087	9.59515	3.23455e-20	2.28443e-19	34.6833
FCRL5	0.76628	0.919342	7.3616	6.94188e-13	2.77942e-12	18.0296
NDUFS8	0.765658	4.06544	9.25841	5.05973e-19	3.27812e-18	31.9636
TMED9	0.765622	6.54559	10.6008	5.94682e-24	5.51568e-23	43.2014
BCAS1	0.765549	1.46832	4.38631	1.39021e-05	2.89018e-05	1.67486
GNG4	0.765326	0.808536	5.03164	6.66142e-07	1.58409e-06	4.59189
UBE2O	0.764821	3.01951	11.5014	1.70197e-27	2.0202e-26	51.2932
PPP1R16A	0.764796	2.60532	7.91098	1.48722e-14	6.78803e-14	21.8101
HPDL	0.764787	0.828359	7.12527	3.39311e-12	1.28258e-11	16.4715
PTHLH	0.764785	1.04531	5.42022	9.03689e-08	2.3166e-07	6.52349
BICDL2	0.764672	2.63098	6.52161	1.61901e-10	5.28464e-10	12.6842
RCN1	0.763941	4.08089	8.58248	1.02266e-16	5.52034e-16	26.7194
GPATCH4	0.763931	3.12366	9.97404	1.35294e-21	1.05604e-20	37.825
MRPS35	0.76369	5.00867	8.91105	8.02846e-18	4.72482e-17	29.2319
MRPL13	0.763473	3.11923	8.96617	5.20375e-18	3.09298e-17	29.6602
DNPH1	0.763457	4.42114	7.61078	1.24711e-13	5.30354e-13	19.7173
ZFYVE19	0.763061	2.9976	10.2051	1.87561e-22	1.55102e-21	39.7818
TELO2	0.762902	3.28525	8.67343	5.09156e-17	2.81206e-16	27.4078
POLD2	0.762411	4.55727	9.16589	1.0643e-18	6.72577e-18	31.2285
AIFM1	0.762374	3.88693	11.5935	7.22186e-28	8.81404e-27	52.1439
PRPF3	0.762065	3.44985	9.7878	6.50696e-21	4.84136e-20	36.2702
EPOP	0.761774	1.44841	8.81821	1.65934e-17	9.51061e-17	28.5148
CLCN2	0.761752	1.47521	11.611	6.13606e-28	7.53291e-27	52.3056
HNRNPAB	0.761751	5.93072	11.7996	1.04692e-28	1.35289e-27	54.0608
LSM2	0.761343	5.05262	8.31895	7.48335e-16	3.77811e-15	24.756
VPS37D	0.761127	1.49529	7.6974	6.79596e-14	2.96022e-13	20.3145
ETNK2	0.761006	1.70373	6.99517	7.9873e-12	2.91871e-11	15.6316
UNG	0.760952	3.91006	9.45888	9.92357e-20	6.78476e-19	33.5744
CPSF3	0.760766	3.66929	13.557	3.52805e-36	7.581e-35	71.1552
KISS1R	0.760386	0.696168	6.89641	1.51696e-11	5.41527e-11	15.0026
CHRNB1	0.760001	1.98662	9.11314	1.62234e-18	1.00844e-17	30.8119
PMM2	0.757971	1.81441	13.318	3.93314e-35	7.95973e-34	68.7581
YIF1A	0.757115	4.98622	8.84852	1.30997e-17	7.5705e-17	28.7483
MCM8	0.757098	1.5582	9.70094	1.34446e-20	9.77662e-20	35.552
HAL	0.757002	1.07984	5.31831	1.54447e-07	3.88233e-07	6.00439
SLC1A7	0.756852	1.41233	3.34569	0.000878692	0.00150022	-2.23686
GTF2IRD1	0.756564	2.54283	10.68	2.95e-24	2.79055e-23	43.8963
SEPHS2	0.7563	5.2817	8.50162	1.8927e-16	1.00287e-15	26.112
PPME1	0.756296	3.147	12.6711	2.41079e-32	4.01703e-31	62.3796
CLIC6	0.756133	4.52743	3.19292	0.00149167	0.00247195	-2.72652
INTS13	0.75596	2.95326	10.1251	3.72983e-22	3.01566e-21	39.1009
C1orf122	0.755954	3.9705	9.29548	3.75052e-19	2.46046e-18	32.2596
KNOP1	0.755514	1.75345	15.2273	1.0009e-43	3.33554e-42	88.4415
CPNE5	0.754921	1.53821	7.0169	6.92875e-12	2.54247e-11	15.771
DROSHA	0.754439	3.18522	9.48584	7.95631e-20	5.47337e-19	33.7929
MRPL55	0.754353	4.15431	8.61245	8.13191e-17	4.42393e-16	26.9457
CALR	0.754282	8.63581	10.5665	8.04493e-24	7.40453e-23	42.9019
ABRACL	0.754097	4.78008	7.87384	1.94134e-14	8.77202e-14	21.5478
INTS7	0.752901	2.79337	12.2256	1.81795e-30	2.67658e-29	58.0854
LRRC45	0.752422	2.97315	8.26099	1.15218e-15	5.7372e-15	24.3305
NAA10	0.752316	3.06156	10.1403	3.2754e-22	2.66242e-21	39.2296
P3H3	0.752156	2.42807	6.03376	3.00202e-09	8.79638e-09	9.83296
PLEKHG2	0.751908	2.71529	6.1173	1.84497e-09	5.51443e-09	10.3076
CHAF1A	0.751421	2.26148	9.29007	3.91822e-19	2.56745e-18	32.2163
SF3B4	0.751338	5.50809	9.77941	6.98088e-21	5.17552e-20	36.2006
GEMIN7	0.751338	3.13355	10.468	1.91193e-23	1.70612e-22	42.044
LFNG	0.75132	3.86673	4.92377	1.13435e-06	2.62897e-06	4.07877
TMEM176B	0.750994	5.66533	4.9567	9.6521e-07	2.25229e-06	4.23434
LTB	0.750937	3.271	4.61587	4.91185e-06	1.06991e-05	2.67029
PSMD11	0.750879	4.09234	10.6688	3.25839e-24	3.07356e-23	43.7977
FCGBP	0.750787	2.07893	4.02028	6.65245e-05	0.000129226	0.185682
SLC37A4	0.749922	2.65987	11.8057	9.88889e-29	1.27988e-27	54.1175
UCK2	0.749691	2.09476	6.13104	1.70212e-09	5.10941e-09	10.3862
SRP9	0.749437	6.53714	10.4795	1.72803e-23	1.54532e-22	42.1442
CBX1	0.749052	4.55981	9.64475	2.14482e-20	1.53452e-19	35.0898
WDR34	0.749027	4.82537	7.48601	2.96223e-13	1.22541e-12	18.8666
TRAF7	0.748843	4.4149	10.6782	2.99691e-24	2.83171e-23	43.8806
RFLNA	0.74877	1.11881	5.79319	1.1826e-08	3.28693e-08	8.49803
SNRPB	0.748743	6.84896	7.09062	4.26726e-12	1.59816e-11	16.2465
PTGR1	0.748214	3.57019	5.36139	1.23262e-07	3.12668e-07	6.22277
ATPSCKMT	0.747418	2.69983	10.5338	1.0727e-23	9.77607e-23	42.6167
NEK6	0.747385	4.1693	10.0085	1.00983e-21	7.94301e-21	38.1146
TRIT1	0.747336	3.17068	10.48	1.72059e-23	1.54032e-22	42.1485
G6PD	0.747262	4.92484	4.40711	1.26748e-05	2.64523e-05	1.76312
TRPM2	0.747191	1.6416	7.77392	3.95755e-14	1.74802e-13	20.8466
C2CD4D	0.746881	0.912748	9.09899	1.81611e-18	1.1222e-17	30.7004
PRPS2	0.746864	4.23661	9.56059	4.3026e-20	3.00948e-19	34.4011
RFC2	0.746631	3.83359	9.39563	1.66348e-19	1.11585e-18	33.0635
FAM189B	0.746539	3.1787	9.93029	1.96015e-21	1.51041e-20	37.4579
ITGAV	0.746438	4.42301	6.57062	1.19514e-10	3.95131e-10	12.9811
GALNT2	0.746354	4.164	9.40405	1.55309e-19	1.04347e-18	33.1314
DNAJA3	0.746288	3.20859	14.3169	1.44935e-39	3.80476e-38	78.9095
TMEM14A	0.745932	4.67383	8.2009	1.79809e-15	8.82968e-15	23.8917
MUC5AC	0.745861	1.17091	2.66405	0.00795458	0.012007	-4.25074
NHS	0.745398	1.19883	7.56624	1.70051e-13	7.1624e-13	19.4123
CMBL	0.745111	3.53727	4.10352	4.70712e-05	9.27863e-05	0.513691
PLA2G2D	0.745057	1.66808	4.38048	1.42658e-05	2.96099e-05	1.6502
DNMT3B	0.744961	1.10954	7.91873	1.40657e-14	6.43045e-14	21.865
CRACR2B	0.744899	3.02155	5.33315	1.42924e-07	3.6008e-07	6.07946
SYNGR3	0.744434	0.868121	7.19151	2.18394e-12	8.37655e-12	16.904
HLTF	0.744305	3.00885	7.97713	9.23006e-15	4.27239e-14	22.2799
SEC61A1	0.744244	6.58329	11.8898	4.47011e-29	5.93266e-28	54.9057
MTIF2	0.744063	3.4879	13.8166	2.51416e-37	5.71886e-36	73.7816
NFYA	0.743427	3.60388	10.5629	8.30538e-24	7.63583e-23	42.8703
ZG16B	0.743256	1.1829	4.70743	3.20325e-06	7.10623e-06	3.08043
SLC9A7	0.743182	1.84937	9.07175	2.25565e-18	1.38305e-17	30.4862
PAK1IP1	0.743134	3.59023	9.05451	2.58688e-18	1.5786e-17	30.3508
TOMM40	0.742742	4.05641	8.64836	6.17416e-17	3.39315e-16	27.2175
UBQLN4	0.742536	4.07606	10.0079	1.01452e-21	7.97476e-21	38.11
NTMT1	0.742533	2.74553	10.8965	4.27008e-25	4.25631e-24	45.8125
CLSTN3	0.742433	3.68773	9.09861	1.82157e-18	1.12515e-17	30.6974
PSMB5	0.742418	5.92251	8.90293	8.55627e-18	5.02482e-17	29.169
TMEM147	0.742144	5.25399	8.31933	7.46207e-16	3.7685e-15	24.7588
H2AFZ	0.74172	5.91588	8.28795	9.42889e-16	4.72605e-15	24.5281
ALYREF	0.741654	5.16891	7.92575	1.33731e-14	6.12728e-14	21.9148
ZWILCH	0.741445	1.98837	10.7678	1.35074e-24	1.30585e-23	44.6706
KNSTRN	0.741004	2.22495	8.33281	6.74746e-16	3.42418e-15	24.8581
RRP1	0.740667	3.07055	10.9621	2.3658e-25	2.40556e-24	46.398
KNL1	0.740643	0.879281	10.173	2.47192e-22	2.03006e-21	39.5083
MUC16	0.740489	0.883106	5.75907	1.43106e-08	3.94729e-08	8.31257
B3GAT3	0.739581	4.13866	8.91923	7.52868e-18	4.44166e-17	29.2953
ACAP3	0.73947	2.44734	8.16506	2.34196e-15	1.13733e-14	23.6313
RPE	0.739214	3.5416	11.6647	3.71615e-28	4.63368e-27	52.8034
CYP4F11	0.739131	1.11874	4.00135	7.19083e-05	0.000139214	0.111978
CENPL	0.738922	1.39859	11.8617	5.82695e-29	7.64833e-28	54.6425
AP1M2	0.738869	5.00652	8.68203	4.76521e-17	2.63706e-16	27.4732
MEX3D	0.738714	3.23729	7.99254	8.25582e-15	3.8406e-14	22.3898
TFAP4	0.738563	1.49078	14.4406	3.99987e-40	1.07887e-38	80.1901
ERBB3	0.737682	4.76793	6.31857	5.58231e-10	1.74536e-09	11.4744
HMGB2	0.737624	4.75109	6.95502	1.03757e-11	3.75531e-11	15.375
TMEM263	0.737444	3.9721	9.13306	1.38387e-18	8.66983e-18	30.969
MRPS26	0.737339	5.10206	7.29459	1.09311e-12	4.31048e-12	17.5836
KRTAP4-1	0.736957	0.661995	6.49621	1.89336e-10	6.1549e-10	12.5311
GPR84	0.736906	1.13397	8.00093	7.76894e-15	3.62218e-14	22.4497
MRPL52	0.736578	3.60758	9.46224	9.65468e-20	6.60633e-19	33.6016
CSAG1	0.736471	0.684461	3.61187	0.000332776	0.00059813	-1.33137
MRPS10	0.736245	4.56201	10.3737	4.35435e-23	3.80033e-22	41.2285
TIMM10	0.736113	4.7116	8.36422	5.33368e-16	2.72828e-15	25.09
UTP25	0.735514	2.01044	13.167	1.78454e-34	3.44049e-33	67.2549
ATP2A2	0.73551	4.83863	9.17839	9.62876e-19	6.10102e-18	31.3275
HIP1R	0.735311	3.15516	7.75134	4.64412e-14	2.04317e-13	20.6892
CTSV	0.735292	1.09564	6.01347	3.37603e-09	9.85941e-09	9.71853
TFF2	0.73518	0.675597	2.77166	0.00577232	0.00887428	-3.96225
MCIDAS	0.73493	0.840078	7.45	3.79467e-13	1.55322e-12	18.6232
POF1B	0.734865	1.65112	4.45445	1.02564e-05	2.16023e-05	1.96543
CEP72	0.734715	1.61064	9.41684	1.39929e-19	9.43939e-19	33.2345
RHBDF2	0.73462	2.90406	8.19393	1.89304e-15	9.27958e-15	23.841
SPATC1L	0.734255	1.95832	7.04772	5.66077e-12	2.09701e-11	15.9693
DDX39B	0.734031	3.72832	6.02159	3.22118e-09	9.41705e-09	9.76429
RFC5	0.733925	2.58987	9.5237	5.83012e-20	4.03899e-19	34.1005
FSTL4	0.733494	1.2241	4.37574	1.45682e-05	3.01963e-05	1.63018
BRIP1	0.733331	0.851493	10.6145	5.26715e-24	4.89646e-23	43.3217
POLR2J	0.733254	4.61801	8.51694	1.6849e-16	8.9618e-16	26.2267
DNAJC10	0.733012	2.93469	9.64473	2.14517e-20	1.53452e-19	35.0897
SLC27A2	0.732959	2.14449	5.29789	1.71775e-07	4.30236e-07	5.90147
DCAF12	0.732779	4.41066	9.71478	1.19802e-20	8.73457e-20	35.6661
DNMT3A	0.732309	2.33005	9.47271	8.86071e-20	6.08049e-19	33.6865
TXN	0.732054	7.19703	6.65736	6.95261e-11	2.34839e-10	13.5113
PLEKHA8	0.732002	1.51784	11.0572	1.00155e-25	1.04512e-24	47.2505
CEP131	0.731838	2.59162	7.60601	1.28931e-13	5.47604e-13	19.6846
HTRA3	0.731792	3.94236	4.38106	1.42292e-05	2.95468e-05	1.65266
TTC13	0.731362	2.65558	10.3521	5.25408e-23	4.54519e-22	41.0424
TMCO1	0.730819	4.51986	11.1569	4.0451e-26	4.30995e-25	48.1497
SYNE4	0.730664	2.51212	6.79714	2.86944e-11	1.0031e-10	14.378
TAS1R3	0.730593	1.02261	6.96989	9.41855e-12	3.42075e-11	15.4699
TRMT2A	0.730444	3.17369	9.14918	1.21651e-18	7.64428e-18	31.0964
NOTCH3	0.730403	4.26071	6.14904	1.53121e-09	4.61631e-09	10.4894
PSRC1	0.729796	1.70821	8.1864	2.0012e-15	9.78392e-15	23.7862
MTHFD1L	0.729607	2.80972	10.2858	9.34168e-23	7.89715e-22	40.4722
LACTB2	0.729557	4.00923	7.1345	3.19164e-12	1.20809e-11	16.5315
C4BPB	0.729534	1.38701	4.37456	1.46445e-05	3.03469e-05	1.62519
PFDN4	0.729341	3.33612	8.68314	4.72467e-17	2.61549e-16	27.4816
SMIM31	0.728846	0.941726	5.3257	1.48605e-07	3.74111e-07	6.04172
USP21	0.728621	3.28261	11.1225	5.53251e-26	5.86109e-25	47.8391
MDH2	0.728524	5.72701	9.85121	3.82049e-21	2.89021e-20	36.7973
ZNF598	0.728353	3.23452	8.86065	1.19147e-17	6.90962e-17	28.8419
SUGCT	0.728277	1.10569	7.50585	2.58347e-13	1.07271e-12	19.0011
MED20	0.727416	3.00638	10.9624	2.35877e-25	2.39987e-24	46.401
MFSD6L	0.727161	1.30809	5.16057	3.48125e-07	8.49502e-07	5.21839
MEN1	0.727069	3.47188	10.1776	2.37717e-22	1.95418e-21	39.547
HIST1H2AD	0.726614	0.808176	5.88439	7.07071e-09	2.00565e-08	8.99851
GORAB	0.726593	2.38452	11.564	9.50703e-28	1.15188e-26	51.8711
B4GALT4	0.726488	2.35165	8.90509	8.41242e-18	4.94208e-17	29.1857
FTSJ1	0.726438	3.95128	11.2829	1.27792e-26	1.4158e-25	49.2928
GRHL3	0.726358	0.754579	9.00858	3.72269e-18	2.23979e-17	29.9911
RBIS	0.726119	3.5984	8.77605	2.30311e-17	1.30658e-16	28.1911
ZNF92	0.725727	2.08864	10.2568	1.2004e-22	1.0041e-21	40.2238
SDC1	0.725607	7.24627	6.05803	2.60753e-09	7.68089e-09	9.97028
CKAP5	0.725377	3.61156	9.23127	6.29633e-19	4.04477e-18	31.7474
OSMR	0.724782	4.69235	5.80266	1.12148e-08	3.1259e-08	8.54965
ZNF107	0.724665	1.54822	9.26608	4.75607e-19	3.09098e-18	32.0248
CISD2	0.724664	3.89536	12.5302	9.55164e-32	1.53193e-30	61.0118
COPA	0.72436	5.75389	11.3084	1.01114e-26	1.13074e-25	49.5251
SGO2	0.724202	1.29373	9.10626	1.71389e-18	1.06218e-17	30.7576
CHGB	0.72405	0.843945	3.41271	0.000692156	0.00119432	-2.01512
WDYHV1	0.723641	2.68567	9.68275	1.56424e-20	1.13157e-19	35.4022
CLDN7	0.723494	5.84303	6.85047	2.03926e-11	7.20429e-11	14.7126
GSR	0.723046	4.95369	5.71265	1.85224e-08	5.05311e-08	8.06177
SPINDOC	0.72299	3.18995	8.45832	2.62692e-16	1.37362e-15	25.7886
SCNM1	0.722952	3.28588	9.91011	2.3249e-21	1.78303e-20	37.289
MZT2B	0.722951	4.64096	6.98757	8.39363e-12	3.06317e-11	15.5829
CENPN	0.72249	1.80881	8.5052	1.84197e-16	9.76611e-16	26.1388
C6orf141	0.722313	1.13454	6.17912	1.28229e-09	3.88973e-09	10.6625
SEL1L3	0.72167	4.71377	8.13614	2.89671e-15	1.39537e-14	23.4217
HIST1H2BJ	0.721459	1.29338	5.5927	3.57824e-08	9.49647e-08	7.42213
SRCIN1	0.721452	1.0691	7.97945	9.07628e-15	4.20471e-14	22.2965
WASF1	0.721236	1.67546	7.67921	7.72321e-14	3.34145e-13	20.1887
SLC4A3	0.720756	1.15694	7.07443	4.74818e-12	1.77271e-11	16.1417
WDR12	0.720521	1.97812	12.7446	1.1723e-32	1.99111e-31	63.0959
DLX3	0.720424	1.0207	6.30295	6.13214e-10	1.90976e-09	11.3826
MLLT11	0.720288	1.71328	5.46069	7.28717e-08	1.88514e-07	6.73209
PPP2R2C	0.72019	0.694746	5.43456	8.37488e-08	2.15284e-07	6.59723
EHMT2	0.719658	3.41272	9.22143	6.81505e-19	4.36289e-18	31.6691
AUNIP	0.719637	0.928263	9.27899	4.28524e-19	2.79478e-18	32.1278
LIG1	0.719555	2.48595	9.81003	5.40026e-21	4.03413e-20	36.4547
ENTPD2	0.719443	1.05857	6.31648	5.65305e-10	1.76649e-09	11.4621
MAP11	0.719438	2.88782	9.44466	1.11479e-19	7.58151e-19	33.4593
CLNS1A	0.719396	3.96798	12.2528	1.40012e-30	2.07976e-29	58.3448
TMUB1	0.719377	4.41343	7.41709	4.7545e-13	1.92954e-12	18.4015
ZDHHC18	0.718858	3.41997	10.2406	1.38131e-22	1.15197e-21	40.0848
PPM1G	0.718831	5.08554	10.8058	9.62377e-25	9.41291e-24	45.0067
ODR4	0.718494	3.47676	11.2512	1.7088e-26	1.87329e-25	49.0045
TOP1MT	0.718281	2.47127	9.17768	9.68373e-19	6.13352e-18	31.3219
FUNDC1	0.718101	3.55215	10.5777	7.28694e-24	6.72542e-23	43
TMEM106B	0.71779	3.07517	7.9516	1.11e-14	5.11665e-14	22.0982
ZMIZ2	0.717663	4.35328	7.83495	2.56358e-14	1.14473e-13	21.274
RNF212	0.717502	1.4051	5.38861	1.06809e-07	2.72258e-07	6.36154
RUVBL1	0.717245	3.07908	9.62793	2.46588e-20	1.76092e-19	34.9518
SLC25A22	0.717117	2.9158	8.77759	2.27582e-17	1.29154e-16	28.2028
NUP62CL	0.716672	1.32693	8.18059	2.08875e-15	1.01792e-14	23.744
MCTS2P	0.71535	1.3692	8.7956	1.97854e-17	1.1282e-16	28.3411
MOGS	0.71521	4.72934	11.214	2.40285e-26	2.60675e-25	48.6664
CASP3	0.715203	3.78394	11.4548	2.62172e-27	3.06743e-26	50.8644
ELOC	0.714136	3.50677	8.79958	1.91828e-17	1.09421e-16	28.3716
KRT10	0.713754	3.63241	7.91817	1.4123e-14	6.45488e-14	21.861
TRIM16L	0.713198	1.63481	4.80245	2.04025e-06	4.61573e-06	3.51385
SRP54	0.713073	4.39999	8.45979	2.59799e-16	1.35975e-15	25.7995
CXCL10	0.712311	4.18015	3.22635	0.00133089	0.00222027	-2.62126
TARBP1	0.711576	2.75283	7.63311	1.06697e-13	4.55836e-13	19.8708
PIGM	0.711218	2.89058	10.3488	5.4092e-23	4.6697e-22	41.0135
SNRPD1	0.711078	3.24415	9.41526	1.41746e-19	9.55157e-19	33.2218
DLG3	0.710871	3.1539	10.6418	4.13719e-24	3.87623e-23	43.561
STEAP3	0.710684	3.96215	5.88381	7.09435e-09	2.01201e-08	8.99526
SIGMAR1	0.710265	4.67717	9.46803	9.20744e-20	6.31324e-19	33.6485
GRAMD2B	0.710254	2.76979	8.37974	4.74761e-16	2.43896e-15	25.2048
IARS	0.709915	4.02682	10.732	1.85848e-24	1.7792e-23	44.3543
TOM1L1	0.709738	2.66704	9.83758	4.28455e-21	3.2252e-20	36.6838
PRSS3	0.709566	0.718032	4.39364	1.34571e-05	2.8022e-05	1.70592
PGK1	0.709526	6.66174	7.03959	5.97119e-12	2.20711e-11	15.9169
SLBP	0.709491	4.74	10.4974	1.47637e-23	1.32596e-22	42.3002
PHKG2	0.709439	2.47848	10.895	4.32848e-25	4.30938e-24	45.799
HSP90AB1	0.709146	8.73469	9.13959	1.31345e-18	8.23483e-18	31.0206
BOLA3	0.708894	2.31516	9.67639	1.64923e-20	1.18944e-19	35.3498
GOLPH3L	0.708755	4.1355	8.82962	1.51811e-17	8.72806e-17	28.6026
IGFL2	0.708609	0.728538	6.51142	1.72403e-10	5.61756e-10	12.6227
SDSL	0.708523	2.84869	6.75896	3.65945e-11	1.26681e-10	14.1397
ZNF281	0.707984	3.40528	8.23002	1.4497e-15	7.16101e-15	24.104
GTPBP4	0.707925	3.27373	9.42152	1.34685e-19	9.10771e-19	33.2723
NPLOC4	0.707757	4.13411	11.5316	1.28582e-27	1.54225e-26	51.5714
UPK3A	0.70764	0.849388	5.43236	8.47311e-08	2.17675e-07	6.58593
BRDT	0.707403	0.657106	4.69746	3.35702e-06	7.43649e-06	3.03541
DIPK1A	0.707232	2.47738	9.27159	4.54934e-19	2.96239e-18	32.0687
CD1A	0.70711	1.59756	3.71006	0.000228985	0.000418514	-0.980679
RABIF	0.706573	3.25682	14.0166	3.23265e-38	7.79295e-37	75.8214
TMEM63A	0.706489	3.46979	7.49086	2.86501e-13	1.18695e-12	18.8994
SRRT	0.706001	4.41571	10.0693	6.01465e-22	4.80251e-21	38.6277
DOP1B	0.705997	2.55639	9.61491	2.74661e-20	1.95304e-19	34.8451
FAM222B	0.705911	3.14503	10.5129	1.28944e-23	1.1637e-22	42.4344
C1orf226	0.705569	2.40961	6.90196	1.46351e-11	5.22782e-11	15.0378
FAM177B	0.705557	0.876011	5.11706	4.34012e-07	1.04957e-06	5.00539
TMPRSS6	0.705475	1.29996	4.09502	4.87766e-05	9.60461e-05	0.479914
AUP1	0.705278	5.80332	10.4306	2.6521e-23	2.3478e-22	41.7197
FOXRED1	0.705095	2.40804	10.6291	4.62957e-24	4.32059e-23	43.4496
FAAH2	0.705049	2.88475	7.44584	3.90446e-13	1.5962e-12	18.5951
SH3PXD2B	0.705006	3.07483	6.46276	2.32533e-10	7.50508e-10	12.3302
FOXQ1	0.704545	2.96118	3.23975	0.00127105	0.00212577	-2.57876
POLR3K	0.704518	3.29586	10.3989	3.49612e-23	3.07217e-22	41.446
UTP14A	0.704071	2.84678	13.1821	1.5358e-34	2.97468e-33	67.4041
ENPP3	0.703859	1.26101	4.34039	1.70265e-05	3.50313e-05	1.48138
NOL11	0.703827	3.51216	12.0307	1.17341e-29	1.62854e-28	56.2336
GTPBP2	0.703688	4.03476	10.6848	2.82652e-24	2.67526e-23	43.9387
GRB14	0.703555	1.63469	5.19341	2.94433e-07	7.2292e-07	5.38027
LAMTOR2	0.703322	5.09056	8.57642	1.07112e-16	5.77071e-16	26.6738
FGD6	0.703131	2.56291	7.14575	2.96194e-12	1.12392e-11	16.6049
TKT	0.703066	5.70527	6.88523	1.6305e-11	5.80693e-11	14.9319
F5	0.703041	1.19402	4.45943	1.00293e-05	2.11506e-05	1.98684
NVL	0.702207	2.72865	12.6836	2.13386e-32	3.56625e-31	62.5008
SIRPG	0.701573	1.25004	7.27458	1.25107e-12	4.8952e-12	17.451
WDR4	0.701551	2.24247	10.5511	9.21703e-24	8.42757e-23	42.7671
TRIM46	0.701349	1.08074	7.88685	1.76854e-14	8.01726e-14	21.6395
NLE1	0.701323	2.11388	12.1035	5.85449e-30	8.32594e-29	56.9241
BRCC3	0.701146	3.33601	10.7584	1.46823e-24	1.41697e-23	44.588
MRPL37	0.701069	4.62678	11.0683	9.05775e-26	9.46359e-25	47.3502
KPNB1	0.700835	5.0834	10.13	3.57604e-22	2.89692e-21	39.1426
LGALS3BP	0.700402	8.16013	5.55131	4.47904e-08	1.1786e-07	7.20419
SNRPA	0.700375	4.52345	10.7696	1.32893e-24	1.28551e-23	44.6868
PDIK1L	0.700306	2.3837	9.78923	6.42949e-21	4.78586e-20	36.2821
C1orf131	0.700168	1.76156	15.6602	9.70521e-46	3.61692e-44	93.0555
PTS	0.699695	2.56907	10.064	6.2941e-22	5.01606e-21	38.5827
ADAMTS16	0.699465	0.858465	7.54307	1.99705e-13	8.37547e-13	19.2543
FASTKD3	0.69922	2.4073	9.89302	2.68599e-21	2.0496e-20	37.146
RHOT2	0.699145	3.84614	8.09486	3.92005e-15	1.87051e-14	23.1236
NOL10	0.698655	3.25167	13.1411	2.31276e-34	4.41807e-33	66.9971
NHP2	0.698473	4.71451	8.59628	9.20352e-17	4.99389e-16	26.8235
NONO	0.698455	6.0553	11.8939	4.29973e-29	5.71108e-28	54.9443
EEF1AKMT3	0.697574	2.45402	9.29724	3.69771e-19	2.42772e-18	32.2736
KLHDC7B	0.697348	1.3095	5.65517	2.54309e-08	6.85936e-08	7.75376
MRPS25	0.697255	3.36136	7.42601	4.47286e-13	1.81922e-12	18.4616
ITPA	0.697058	4.43788	8.83636	1.44037e-17	8.30115e-17	28.6546
BRCA1	0.696341	1.36663	8.08856	4.10472e-15	1.95639e-14	23.0782
NSD2	0.696169	2.33215	8.57028	1.12253e-16	6.03794e-16	26.6275
SCX	0.696152	1.32618	6.40425	3.32397e-10	1.05749e-09	11.9809
TUBB	0.695777	7.46069	7.74198	4.96184e-14	2.17893e-13	20.624
NACC1	0.695777	4.12895	8.39976	4.08463e-16	2.10484e-15	25.3531
C2orf15	0.695675	1.52469	10.1339	3.46073e-22	2.80589e-21	39.1751
RNF181	0.695634	5.9149	7.97483	9.38483e-15	4.34282e-14	22.2636
SPIRE2	0.695088	1.74425	7.16924	2.53348e-12	9.66392e-12	16.7582
CCT2	0.69508	4.96681	6.87929	1.69413e-11	6.02071e-11	14.8943
PAIP1	0.694938	4.28096	9.44433	1.11779e-19	7.59567e-19	33.4567
DDX55	0.694899	2.26184	10.9056	3.9337e-25	3.93747e-24	45.8938
RMI1	0.694762	2.29791	10.3936	3.66117e-23	3.21551e-22	41.4002
HIST1H3E	0.694603	1.15886	5.65404	2.55901e-08	6.90006e-08	7.7477
SLC52A3	0.694075	1.80152	6.70702	5.08563e-11	1.7371e-10	13.8174
TSPAN5	0.694009	2.1891	6.69111	5.62254e-11	1.90956e-10	13.7192
SPINK2	0.69378	0.883434	5.76313	1.39906e-08	3.86222e-08	8.33456
KIF20B	0.693719	1.51241	8.68747	4.56986e-17	2.53147e-16	27.5145
R3HDM4	0.693685	4.88423	9.07993	2.11356e-18	1.29927e-17	30.5505
XPO1	0.692614	4.00249	10.9174	3.53766e-25	3.54957e-24	45.999
SF3B6	0.692384	5.66721	10.8383	7.19504e-25	7.0747e-24	45.2951
PACC1	0.691768	2.29712	9.45721	1.00599e-19	6.87233e-19	33.5609
ABCC2	0.691683	0.776787	3.63762	0.000301954	0.000544665	-1.24029
CCNE2	0.691332	0.992237	8.88555	9.80563e-18	5.7283e-17	29.0343
PARS2	0.69122	1.90074	12.6035	4.67011e-32	7.63685e-31	61.7226
TIMM9	0.691185	3.92091	9.9825	1.2592e-21	9.85173e-21	37.8961
MPZL1	0.690981	4.6991	12.3519	5.38113e-31	8.21237e-30	59.2946
FAAP100	0.690324	3.24823	9.19684	8.3037e-19	5.27946e-18	31.4738
BCS1L	0.689982	2.7402	12.6083	4.45953e-32	7.31398e-31	61.7685
APRT	0.689815	5.66105	6.96654	9.62641e-12	3.49397e-11	15.4485
COPG1	0.689789	5.93626	10.6685	3.26551e-24	3.07854e-23	43.7955
ECEL1	0.689582	0.686369	4.94267	1.03404e-06	2.40619e-06	4.16796
NASP	0.689442	3.63341	8.15957	2.43841e-15	1.18245e-14	23.5915
CNGA3	0.689439	0.690581	4.67743	3.68781e-06	8.1358e-06	2.94521
MRPS15	0.689383	4.48603	8.29634	8.85771e-16	4.44775e-15	24.5898
DGKA	0.688958	1.93342	8.35111	5.88409e-16	2.9988e-15	24.9931
QPCTL	0.688873	2.79662	9.1009	1.78861e-18	1.10602e-17	30.7154
OVGP1	0.688724	1.30598	7.08124	4.53978e-12	1.69756e-11	16.1858
SAA2	0.688549	1.25174	4.00328	7.13406e-05	0.000138163	0.119483
OVOL2	0.688128	2.35936	7.742	4.96105e-14	2.17893e-13	20.6242
FKBPL	0.688093	2.6675	9.84665	3.96997e-21	2.99785e-20	36.7593
TMEM258	0.688045	4.61279	10.1283	3.63006e-22	2.93783e-21	39.1278
TUFT1	0.687874	3.52241	7.41568	4.80064e-13	1.94684e-12	18.3921
GGCX	0.687704	3.49596	7.8613	2.12373e-14	9.55221e-14	21.4593
BRAT1	0.687623	3.23431	8.34273	6.26507e-16	3.18616e-15	24.9312
PPP1R3B	0.687549	3.53922	5.95792	4.64822e-09	1.34105e-08	9.40697
CIB2	0.687079	1.70523	6.04688	2.78202e-09	8.17614e-09	9.90714
KDELR1	0.686828	6.67292	11.0433	1.13557e-25	1.17981e-24	47.1259
TIMM23	0.686691	5.27112	11.0821	7.98576e-26	8.36976e-25	47.4751
TRABD	0.686657	3.97503	8.0106	7.24241e-15	3.3852e-14	22.5188
DPM2	0.686619	4.27658	8.97365	4.90554e-18	2.92406e-17	29.7185
RNF208	0.686421	2.86933	6.25513	8.16498e-10	2.51983e-09	11.1031
SHARPIN	0.686275	4.76289	7.55651	1.81937e-13	7.65145e-13	19.3459
TACO1	0.686272	3.33658	11.118	5.76526e-26	6.09993e-25	47.7983
THNSL1	0.686247	1.86232	10.4889	1.59104e-23	1.42664e-22	42.2261
CERS6	0.685653	2.371	7.8879	1.75527e-14	7.95925e-14	21.647
D2HGDH	0.685477	2.42592	6.76317	3.56299e-11	1.23444e-10	14.1659
NOB1	0.685464	4.29157	10.6378	4.28554e-24	4.01072e-23	43.5261
NIF3L1	0.68481	3.70115	12.0288	1.19384e-29	1.65277e-28	56.2165
GRIN2D	0.684572	0.922147	5.67713	2.2538e-08	6.09877e-08	7.87109
LSM5	0.684407	3.01259	9.98095	1.27588e-21	9.97754e-21	37.883
DENR	0.684306	4.35764	11.0467	1.10097e-25	1.146e-24	47.1566
PCSK1	0.684303	0.730261	3.04283	0.00245932	0.003968	-3.18614
CHI3L1	0.684193	4.6679	3.0754	0.00221017	0.00358819	-3.08822
NT5DC2	0.684034	3.66795	7.38796	5.80114e-13	2.33838e-12	18.206
DDX27	0.683175	3.73028	10.0992	4.65747e-22	3.74211e-21	38.8809
MRPS23	0.683159	3.2709	9.20249	7.93542e-19	5.05301e-18	31.5187
ZBTB41	0.682702	2.45152	9.66374	1.83207e-20	1.31619e-19	35.2458
PIDD1	0.682419	1.87471	7.8354	2.55534e-14	1.14166e-13	21.2772
CCAR1	0.681878	3.63841	11.897	4.17548e-29	5.55489e-28	54.9734
FHL3	0.681708	3.49091	8.35642	5.65463e-16	2.88626e-15	25.0323
HIST2H2BE	0.680468	3.47929	4.54782	6.71748e-06	1.44493e-05	2.37033
NOL6	0.680428	3.65991	9.58269	3.58519e-20	2.52354e-19	34.5815
PPP4C	0.680327	5.31014	8.95752	5.5707e-18	3.30756e-17	29.5929
XYLT2	0.680188	3.21082	9.84327	4.08458e-21	3.08161e-20	36.7311
PRELID3B	0.680152	4.96287	7.92894	1.30688e-14	5.99278e-14	21.9374
WDR90	0.680001	1.89503	7.45408	3.6899e-13	1.5133e-12	18.6507
ATXN2L	0.679748	4.46402	10.199	1.97633e-22	1.63189e-21	39.7299
TBL2	0.6794	3.63542	11.1802	3.27113e-26	3.51446e-25	48.3604
XKR9	0.679399	0.940455	7.45006	3.79308e-13	1.55295e-12	18.6236
SNRPF	0.679393	3.67648	8.15093	2.59849e-15	1.25788e-14	23.5288
TRMU	0.678992	1.87523	10.3636	4.75432e-23	4.12997e-22	41.1414
CLDN1	0.678983	3.98568	3.63194	0.000308514	0.000556017	-1.26043
SRMS	0.678568	0.88929	6.36379	4.24913e-10	1.33957e-09	11.741
ZYG11A	0.678504	0.628582	8.16705	2.3079e-15	1.12209e-14	23.6457
SLC38A7	0.678462	2.24264	10.5515	9.17857e-24	8.40162e-23	42.7712
HSPB1	0.678456	7.78671	5.01541	7.22144e-07	1.71069e-06	4.51403
RECQL5	0.678412	2.23733	9.76415	7.9322e-21	5.85482e-20	36.0742
TMC5	0.678375	4.18127	4.39169	1.35741e-05	2.82619e-05	1.69766
ATP5MC1	0.67833	4.21642	7.55793	1.80157e-13	7.58039e-13	19.3555
TNNI3	0.678119	0.898163	4.84997	1.62353e-06	3.71372e-06	3.7336
SLC6A3	0.677851	0.776472	4.36169	1.55017e-05	3.2008e-05	1.5709
PRPF19	0.677836	5.36819	10.3678	4.58357e-23	3.98995e-22	41.1776
TRUB2	0.677692	2.80261	11.6681	3.5988e-28	4.49742e-27	52.8352
NRIP3	0.677021	1.29631	5.41514	9.28328e-08	2.37793e-07	6.49743
ZNF623	0.676987	2.60536	10.014	9.63043e-22	7.59158e-21	38.1616
CIART	0.676979	1.62999	6.11277	1.89458e-09	5.65564e-09	10.2817
DNAJC9	0.676932	2.31468	10.9921	1.80457e-25	1.84841e-24	46.6666
SYTL1	0.676518	3.02381	5.80406	1.11266e-08	3.10237e-08	8.55732
RPLP0	0.676416	8.17683	7.12292	3.44634e-12	1.30181e-11	16.4562
TBL1X	0.67627	2.75011	7.16724	2.56752e-12	9.7893e-12	16.7451
IRF3	0.676178	4.07061	9.18585	9.06913e-19	5.75297e-18	31.3867
CREBZF	0.675928	3.56034	8.18251	2.05939e-15	1.00448e-14	23.758
TMEM176A	0.675919	4.08899	4.45071	1.04301e-05	2.1946e-05	1.94937
FGFRL1	0.675864	3.37436	6.87456	1.7465e-11	6.19756e-11	14.8645
MRPL21	0.675764	3.42484	9.10986	1.66533e-18	1.03439e-17	30.786
NUP42	0.675742	2.74166	10.3675	4.59519e-23	3.99799e-22	41.1751
MARS2	0.675492	2.02616	11.2727	1.40344e-26	1.55178e-25	49.1999
SERPINE2	0.675435	1.8043	5.36901	1.18422e-07	3.00803e-07	6.26156
ARL16	0.675296	3.3603	8.29683	8.82563e-16	4.43433e-15	24.5933
C11orf98	0.675032	2.37921	8.75763	2.65691e-17	1.49915e-16	28.05
TMEM165	0.674967	4.28206	9.11451	1.60475e-18	9.98619e-18	30.8226
EEF1E1	0.674923	2.53711	9.3201	3.07294e-19	2.0255e-18	32.4566
R3HDM1	0.674703	2.29007	11.5898	7.48077e-28	9.12337e-27	52.109
ARL4C	0.674676	4.39903	5.93523	5.29294e-09	1.51814e-08	9.28047
FAAP24	0.674326	1.49875	8.98678	4.42246e-18	2.64555e-17	29.8209
THPO	0.674322	0.800584	5.35289	1.2889e-07	3.262e-07	6.17953
NUAK2	0.674137	2.89573	6.59176	1.04787e-10	3.47956e-10	13.1098
DLL3	0.674118	0.618516	4.80182	2.04639e-06	4.62835e-06	3.51096
EARS2	0.674118	2.65645	11.462	2.45248e-27	2.87345e-26	50.9306
RAB19	0.673477	1.21824	9.81595	5.13862e-21	3.84556e-20	36.5039
PRMT5	0.673134	3.94322	8.54474	1.36374e-16	7.30945e-16	26.4354
AMN	0.673095	1.32459	4.98714	8.30675e-07	1.9553e-06	4.37902
EIF4A3	0.672581	4.19491	9.21816	6.99661e-19	4.47232e-18	31.6432
CHCHD2	0.672348	7.40588	6.77457	3.31358e-11	1.15209e-10	14.237
MEA1	0.672186	5.7655	9.02371	3.30242e-18	1.99917e-17	30.1095
MAMDC4	0.672043	1.20377	6.88159	1.66923e-11	5.93724e-11	14.9089
KIAA0895L	0.671895	2.16764	6.69132	5.61513e-11	1.90743e-10	13.7205
LRIF1	0.67185	2.55941	8.74257	2.9857e-17	1.67955e-16	27.9348
B4GALNT3	0.671563	3.28061	4.52832	7.34276e-06	1.57213e-05	2.28512
ZNF687	0.671403	3.11785	9.21071	7.42851e-19	4.73926e-18	31.5839
VDAC1	0.671321	5.68695	9.55565	4.48136e-20	3.12796e-19	34.3608
WDR77	0.670803	3.40509	11.2916	1.17953e-26	1.31115e-25	49.3723
BPNT1	0.670598	3.94028	9.65035	2.04745e-20	1.46903e-19	35.1358
SMS	0.669859	5.0832	8.26203	1.14335e-15	5.70003e-15	24.3381
NOMO1	0.669493	3.30622	9.75518	8.5499e-21	6.29961e-20	36
NDE1	0.669291	2.18875	9.36312	2.16733e-19	1.44224e-18	32.8018
LRRC42	0.668797	3.75058	9.0223	3.33958e-18	2.02094e-17	30.0984
NAPRT	0.668615	3.95426	4.91676	1.17383e-06	2.71482e-06	4.04582
OR2I1P	0.66848	2.36321	3.50486	0.000495355	0.000870664	-1.70335
POLM	0.668231	2.62788	9.83316	4.44673e-21	3.34426e-20	36.647
HSD3B7	0.668017	3.1465	6.97511	9.10404e-12	3.31229e-11	15.5032
B4GALT7	0.667846	2.84403	10.764	1.39699e-24	1.34978e-23	44.6373
ORC5	0.667459	2.49487	10.7337	1.83094e-24	1.75383e-23	44.3691
MTERF3	0.667161	3.37407	9.26464	4.81154e-19	3.1246e-18	32.0133
MXD3	0.667115	1.22212	9.2757	4.40084e-19	2.86793e-18	32.1015
COPB2	0.666856	4.59115	10.8921	4.44007e-25	4.41259e-24	45.7737
RPS6KB2	0.666698	3.26135	10.2856	9.35856e-23	7.90742e-22	40.4704
ZNF587	0.666649	1.83738	9.03983	2.90626e-18	1.7664e-17	30.2357
HOXC13	0.666602	0.601091	5.81678	1.03599e-08	2.89633e-08	8.62678
S100B	0.666513	2.34878	3.7835	0.00017219	0.000319007	-0.712577
PCGF3	0.666292	3.11579	9.36949	2.05785e-19	1.37322e-18	32.8531
SLC35F5	0.666135	3.34815	8.77381	2.34363e-17	1.32867e-16	28.1738
WDR76	0.666073	1.70196	8.30944	8.03398e-16	4.04631e-15	24.686
HIST1H2AM	0.666033	0.662728	7.34232	7.91286e-13	3.15306e-12	17.901
PGLYRP4	0.666026	0.660973	6.20105	1.12621e-09	3.43311e-09	10.7892
CTU2	0.665331	2.37769	10.158	2.81309e-22	2.30232e-21	39.3803
NCAPD3	0.665325	2.09402	8.59124	9.56483e-17	5.18152e-16	26.7855
NUDT22	0.665196	2.91277	9.56552	4.13105e-20	2.89555e-19	34.4413
FAM171A2	0.665175	1.05494	6.4269	2.89553e-10	9.26835e-10	12.1158
EEF2KMT	0.664955	2.02818	12.9275	1.93155e-33	3.45651e-32	64.8878
POLDIP2	0.664448	5.72201	11.1251	5.40254e-26	5.73067e-25	47.8627
RRBP1	0.664439	5.73803	6.26417	7.73561e-10	2.39218e-09	11.1558
MOV10	0.664284	3.37774	8.95141	5.8454e-18	3.46819e-17	29.5453
2022-03-06	0.663551	4.0715	8.23067	1.44269e-15	7.12848e-15	24.1088
BARD1	0.663489	1.60585	9.56359	4.19755e-20	2.93846e-19	34.4255
CKLF	0.663454	3.38703	7.02668	6.49884e-12	2.39366e-11	15.8338
USB1	0.66325	3.19257	10.8676	5.53401e-25	5.47492e-24	45.5554
POLR2D	0.663183	3.2212	12.272	1.16377e-30	1.73485e-29	58.5284
ANTKMT	0.663097	2.64755	7.39341	5.58947e-13	2.25633e-12	18.2425
LTF	0.662772	3.46103	2.40735	0.0164079	0.0236896	-4.89395
MAGEA12	0.662561	0.608396	3.47114	0.000560341	0.000978809	-1.81835
RPA3	0.66252	3.02541	8.18641	2.00094e-15	9.78392e-15	23.7864
DHRS13	0.66233	1.42153	10.5311	1.09893e-23	9.99878e-23	42.5928
COMTD1	0.662297	2.93479	5.47274	6.83322e-08	1.7721e-07	6.79445
RNF39	0.662176	1.99206	5.05157	6.03095e-07	1.4395e-06	4.68781
ERAL1	0.661617	4.45722	10.5574	8.71326e-24	8.00641e-23	42.8228
MTFR2	0.660921	1.20657	7.7621	4.30321e-14	1.89618e-13	20.7642
LAMB3	0.66074	5.95762	3.72854	0.000213236	0.000391272	-0.913714
GLI4	0.660583	2.21941	7.15478	2.78954e-12	1.0614e-11	16.6637
MORF4L2	0.660571	6.37652	10.3662	4.64931e-23	4.04296e-22	41.1635
NPAS2	0.660263	1.44862	7.11715	3.58063e-12	1.35131e-11	16.4187
PLEKHG4	0.659954	1.80879	5.67964	2.22276e-08	6.01772e-08	7.88456
TWIST1	0.659746	0.884031	5.79838	1.1487e-08	3.19591e-08	8.52632
TRIM11	0.659486	2.32466	10.9033	4.01567e-25	4.01712e-24	45.8734
PGF	0.659361	1.34363	6.9164	1.33298e-11	4.77996e-11	15.1294
LSM7	0.659357	4.22472	7.50917	2.52492e-13	1.05023e-12	19.0236
HAX1	0.659356	5.37336	8.31991	7.43003e-16	3.75346e-15	24.7631
ZDHHC13	0.659194	2.08653	9.78467	6.67998e-21	4.96567e-20	36.2442
ACVR1B	0.658619	3.59816	6.97885	8.88454e-12	3.2365e-11	15.5271
HOXC9	0.658555	0.713238	5.90967	6.12408e-09	1.74633e-08	9.13844
DUSP12	0.658248	3.36595	11.4708	2.25948e-27	2.65851e-26	51.012
GTPBP3	0.658028	2.14646	9.75904	8.27865e-21	6.10514e-20	36.0319
SASS6	0.658024	1.442	9.24669	5.56118e-19	3.58908e-18	31.8701
SPTSSB	0.657981	0.677691	4.69975	3.32111e-06	7.35793e-06	3.04573
RPS18	0.657815	9.38043	5.49089	6.20087e-08	1.61337e-07	6.88862
CNKSR1	0.657718	3.27211	7.48287	3.02714e-13	1.25164e-12	18.8453
TMEM208	0.657539	4.56338	7.41234	4.91158e-13	1.98942e-12	18.3696
CHAC1	0.657495	1.63396	6.56972	1.20183e-10	3.97261e-10	12.9757
ARG2	0.657113	1.64517	5.62173	3.05447e-08	8.16613e-08	7.5758
CCM2	0.656974	3.11061	7.97833	9.1504e-15	4.23787e-14	22.2885
MOSPD1	0.656967	3.0182	7.29126	1.11797e-12	4.39811e-12	17.5615
PRR7	0.656951	1.23267	7.65255	9.31202e-14	3.9988e-13	20.0046
PPIH	0.656693	4.00446	8.70004	4.14765e-17	2.30327e-16	27.6102
CHAC2	0.656669	1.83244	7.86917	2.00732e-14	9.05441e-14	21.5148
NPM1	0.656226	6.77904	8.19008	1.94747e-15	9.54022e-15	23.8131
HPS3	0.656187	2.88104	9.28237	4.1698e-19	2.72268e-18	32.1548
IMP4	0.656157	3.87586	11.5369	1.22402e-27	1.46918e-26	51.6203
PITPNM1	0.655764	3.42032	6.94907	1.07847e-11	3.89829e-11	15.3371
AVEN	0.655626	2.71905	9.62242	2.58108e-20	1.84161e-19	34.9066
CD276	0.655572	4.1352	8.86103	1.18794e-17	6.89152e-17	28.8449
HIST1H4E	0.655386	0.75758	4.93406	1.07862e-06	2.50467e-06	4.12731
DOK5	0.655302	0.916038	6.49512	1.90616e-10	6.19365e-10	12.5245
MBOAT7	0.655207	4.18321	8.50775	1.80668e-16	9.58814e-16	26.1579
CEACAM7	0.65499	0.706104	4.33356	1.75445e-05	3.60344e-05	1.4528
FKBP2	0.654909	5.48705	6.53319	1.50718e-10	4.93699e-10	12.7542
SPRR1A	0.65487	0.823221	3.55349	0.00041395	0.000735324	-1.53564
EBNA1BP2	0.654781	4.05526	10.0465	7.30651e-22	5.80626e-21	38.435
SCAMP3	0.65412	5.21661	9.11301	1.62401e-18	1.0091e-17	30.8109
RPP21	0.653207	2.40633	9.46599	9.36253e-20	6.41431e-19	33.632
KDM1A	0.653192	4.03131	10.4662	1.94103e-23	1.73117e-22	42.029
IBSP	0.653088	0.703822	5.11778	4.32451e-07	1.04641e-06	5.00887
SWI5	0.652981	3.41784	9.50259	6.93479e-20	4.78839e-19	33.9289
SH3D21	0.652919	1.57851	7.92466	1.34785e-14	6.17216e-14	21.907
RFC3	0.652786	2.41532	7.63387	1.06134e-13	4.5355e-13	19.8759
SLC39A14	0.652442	2.90954	6.09821	2.06305e-09	6.13222e-09	10.1986
FOXRED2	0.652396	2.50191	6.38028	3.84488e-10	1.21603e-09	11.8386
PSMA5	0.652387	4.10642	9.6891	1.48367e-20	1.07608e-19	35.4545
TTI1	0.652251	3.07352	10.3592	4.94115e-23	4.28781e-22	41.1032
TMPO	0.65207	3.59581	7.20104	2.04914e-12	7.8794e-12	16.9665
ERICH5	0.651956	1.50956	4.38532	1.39632e-05	2.90215e-05	1.67067
ZNF581	0.651896	3.3791	7.82705	2.71221e-14	1.20787e-13	21.2186
MRPS21	0.651741	5.22727	7.31229	9.69872e-13	3.84175e-12	17.7011
BUB3	0.651672	3.40903	11.4676	2.32742e-27	2.73076e-26	50.9826
ERGIC3	0.651461	5.47738	9.96952	1.40584e-21	1.09579e-20	37.787
TOR3A	0.651317	4.10523	10.4463	2.31045e-23	2.05516e-22	41.8564
AK2	0.651162	4.66508	9.76075	8.16064e-21	6.02077e-20	36.0461
PIF1	0.651056	0.804586	8.72636	3.38457e-17	1.89563e-16	27.811
TMEM267	0.651045	2.63757	8.65974	5.65737e-17	3.11426e-16	27.3038
RAE1	0.651025	2.7073	10.6487	3.8918e-24	3.65247e-23	43.6216
MYBPH	0.650841	0.794757	4.4517	1.03839e-05	2.1857e-05	1.95362
TARBP2	0.65052	2.96057	9.36226	2.18246e-19	1.45172e-18	32.795
MRPS33	0.65044	2.81942	9.27959	4.26451e-19	2.78276e-18	32.1326
SDCBP2	0.649701	2.5737	3.52245	0.000464321	0.000819135	-1.64294
NAT10	0.649661	3.61065	11.0861	7.7047e-26	8.09551e-25	47.5106
OST4	0.649534	7.46515	8.49149	2.0437e-16	1.0798e-15	26.0363
SCIN	0.649403	1.80484	4.10128	4.7516e-05	9.36301e-05	0.504763
DPAGT1	0.649207	3.37153	10.4798	1.72331e-23	1.54192e-22	42.1469
TRIM59	0.64891	1.12368	10.4074	3.24509e-23	2.85459e-22	41.5198
CSE1L	0.648729	4.56583	7.90927	1.50561e-14	6.86447e-14	21.798
C6orf136	0.648691	2.90941	8.99937	4.00395e-18	2.40554e-17	29.9192
OGT	0.64851	4.12093	5.61009	3.25485e-08	8.67129e-08	7.5141
LPIN3	0.64849	2.40575	6.77748	3.25275e-11	1.13189e-10	14.2551
ASPH	0.648459	3.95575	4.34679	1.65534e-05	3.41067e-05	1.50826
SYCE3	0.648322	0.969722	6.68968	5.67335e-11	1.92642e-10	13.7104
HAUS5	0.648272	2.26758	7.75694	4.46363e-14	1.9648e-13	20.7282
EIPR1	0.648099	2.54644	11.5994	6.83914e-28	8.37143e-27	52.198
CTSA	0.64787	5.44069	7.62138	1.15814e-13	4.93649e-13	19.7901
TMEM9	0.647821	5.1164	6.73881	4.15884e-11	1.43167e-10	14.0145
RAN	0.647562	5.54899	7.81299	2.99788e-14	1.3319e-13	21.12
RRM1	0.647094	3.89614	8.64136	6.5152e-17	3.57117e-16	27.1644
RPL8	0.646963	9.38438	5.68787	2.12414e-08	5.76379e-08	7.92866
ARHGAP33	0.646578	1.36665	6.58828	1.07084e-10	3.5537e-10	13.0886
TMEM158	0.646291	1.34751	5.47088	6.90134e-08	1.78893e-07	6.78484
ASCL1	0.646166	0.95625	2.29941	0.0218679	0.0309151	-5.1454
GCLM	0.646153	3.05604	5.16904	3.33422e-07	8.15054e-07	5.26009
CDK5	0.646124	2.70571	9.17862	9.61094e-19	6.09203e-18	31.3293
METTL18	0.645968	2.67602	11.0327	1.24982e-25	1.29448e-24	47.0309
THOC3	0.645929	1.71903	10.2161	1.70586e-22	1.41485e-21	39.8757
TOPBP1	0.645739	2.79985	7.6963	6.8484e-14	2.98151e-13	20.307
KRT86	0.645693	1.1377	6.10844	1.94326e-09	5.78645e-09	10.257
TMED4	0.645539	5.32205	10.5722	7.64756e-24	7.04656e-23	42.9521
SYTL2	0.645341	2.10175	5.8946	6.6726e-09	1.89853e-08	9.05493
RNPS1	0.645174	3.82934	13.4117	1.53293e-35	3.17935e-34	69.6948
TMEM223	0.644749	3.17354	9.02048	3.38796e-18	2.04799e-17	30.0842
BZW1	0.644679	4.22366	8.52794	1.54972e-16	8.27441e-16	26.3093
ACTR5	0.644658	2.49284	10.9648	2.30859e-25	2.3517e-24	46.4223
PLEKHS1	0.644414	1.87257	3.26725	0.00115598	0.0019433	-2.49101
TALDO1	0.64363	6.1366	5.73341	1.65079e-08	4.52125e-08	8.1737
STK26	0.643553	3.16447	6.33545	5.04264e-10	1.58107e-09	11.5737
CENPO	0.643535	1.64586	9.41524	1.41763e-19	9.55157e-19	33.2217
SULT1C2	0.643426	1.34673	4.61265	4.98548e-06	1.08552e-05	2.65603
CPSF4	0.643227	2.88767	9.0813	2.09079e-18	1.28716e-17	30.5612
COL15A1	0.642754	2.95783	4.18708	3.30643e-05	6.62318e-05	0.849255
AMBP	0.642515	1.12377	3.36746	0.000813488	0.00139274	-2.16527
PCDH7	0.641719	1.32424	4.83261	1.76524e-06	4.0219e-06	3.65309
RNF183	0.641582	0.647206	5.67064	2.33575e-08	6.31336e-08	7.83639
HSPA1B	0.641571	5.04445	5.92444	5.62952e-09	1.61136e-08	9.22043
TRIM17	0.641549	0.969819	5.48308	6.46558e-08	1.67988e-07	6.84808
COPS7B	0.641512	2.8669	12.5358	9.04007e-32	1.45548e-30	61.0665
SLC1A5	0.641456	5.36109	7.27644	1.23548e-12	4.83761e-12	17.4633
TTC22	0.641449	1.93727	7.71348	6.06791e-14	2.6507e-13	20.426
UBAP2L	0.641094	4.69061	9.69077	1.46325e-20	1.06173e-19	35.4682
TIA1	0.64109	3.63046	7.35318	7.35045e-13	2.93596e-12	17.9734
PSMD3	0.640942	4.89986	9.06229	2.43175e-18	1.4872e-17	30.4119
YARS	0.640575	3.90999	11.7367	1.89097e-28	2.38751e-27	53.4739
MRPL19	0.640552	3.23207	11.3071	1.02376e-26	1.14332e-25	49.5128
CDCP1	0.640213	3.3193	4.74799	2.64469e-06	5.92139e-06	3.26445
CDK5R1	0.640212	1.12	8.0504	5.42282e-15	2.55833e-14	22.8039
DHX37	0.640039	2.36301	9.15777	1.13578e-18	7.16122e-18	31.1643
TNFSF11	0.640037	0.646102	6.14809	1.53978e-09	4.63878e-09	10.484
MFSD4A	0.639973	2.57129	3.20381	0.00143742	0.00238916	-2.69234
TSACC	0.639751	0.689152	9.755	8.56325e-21	6.30388e-20	35.9984
MMACHC	0.639354	1.51061	13.0196	7.75132e-34	1.43318e-32	65.7951
MRPL30	0.639332	3.4263	11.5851	7.80936e-28	9.51021e-27	52.0663
CAPN15	0.638868	2.85783	8.11669	3.341e-15	1.60107e-14	23.2811
LCOR	0.638743	1.81757	8.39101	4.36251e-16	2.24527e-15	25.2882
SSBP1	0.638709	3.6409	10.2536	1.23427e-22	1.03191e-21	40.1963
POLE	0.638564	1.72695	8.55931	1.22045e-16	6.55198e-16	26.545
IFNGR2	0.638353	5.4253	8.32661	7.06754e-16	3.579e-15	24.8124
CD46	0.638239	5.77271	7.91919	1.40194e-14	6.41107e-14	21.8683
DHRS11	0.638149	1.56697	9.72425	1.10704e-20	8.11373e-20	35.7443
SMIM24	0.637897	0.692336	4.62209	4.77233e-06	1.04103e-05	2.69792
FAM98A	0.63785	3.2645	12.828	5.161e-33	9.01339e-32	63.9111
RARS	0.637781	4.22042	11.77	1.38276e-28	1.76367e-27	53.7847
CREB3L2	0.637633	4.15282	6.98779	8.38158e-12	3.05944e-11	15.5843
GOLGA3	0.637599	3.63786	8.04594	5.60201e-15	2.64212e-14	22.7718
RHEB	0.637595	4.67882	8.27281	1.0553e-15	5.27208e-15	24.4171
INTS1	0.6372	4.08634	6.31889	5.57179e-10	1.7424e-09	11.4762
PNN	0.637025	4.4411	6.71482	4.84104e-11	1.65661e-10	13.8657
PRIM2	0.636924	1.92838	9.88548	2.8622e-21	2.17908e-20	37.0831
NT5C3B	0.636869	3.93644	8.18476	2.02548e-15	9.89394e-15	23.7743
FH	0.636818	4.84629	9.75778	8.36649e-21	6.16719e-20	36.0214
USP28	0.636524	2.61039	8.453	2.73478e-16	1.42776e-15	25.7489
ATL2	0.636389	4.16903	8.14294	2.75566e-15	1.3305e-14	23.4709
UGGT1	0.636001	3.46948	8.54422	1.36915e-16	7.33613e-16	26.4315
FAM178B	0.635885	0.721385	7.20519	1.99315e-12	7.67472e-12	16.9937
MTCH2	0.635807	4.75206	10.6903	2.69205e-24	2.55088e-23	43.987
CTH	0.635786	1.79973	6.98281	8.6582e-12	3.15696e-11	15.5525
ATP5MF	0.635719	5.25709	6.70249	5.23316e-11	1.78458e-10	13.7894
STOML2	0.635526	5.35793	7.4132	4.88257e-13	1.97911e-12	18.3754
EIF3I	0.635281	6.75428	9.44796	1.08509e-19	7.38849e-19	33.4861
SNRNP70	0.635142	5.00253	7.29965	1.05637e-12	4.17252e-12	17.6172
NUDT17	0.635073	1.714	9.02042	3.38948e-18	2.04816e-17	30.0838
CLPSL2	0.634698	0.588793	5.99865	3.67753e-09	1.06987e-08	9.63518
PNPT1	0.634684	3.02494	9.05332	2.61129e-18	1.59292e-17	30.3415
SEMA3A	0.634293	1.36082	4.4556	1.02036e-05	2.14991e-05	1.97037
PDP1	0.634262	3.07923	6.32682	5.31186e-10	1.66361e-09	11.5229
[truncated: 2,316 more rows]
