# Supplementary material for: A robust six-gene prognostic signature based on two prognostic subtypes constructed by chromatin regulators is correlated with immunological features and therapeutic response in lung adenocarcinoma
Source: Aging (Albany NY). 2023 Nov 7;15(21):12330–68. doi: 10.18632/aging.205183 (PMC10683604; doi:10.18632/aging.205183)
Supplement: Supplementary Table 2 [file aging-15-205183-s003.xls]

## Sheet: tcga.diff.fit
Supplementary Table 2. Differentially expressed chromatin regulator genes between LUAD and normal lung tissues.
Gene symbol	logFC	AveExpr	t	P.Value	adj.P.Val	B
Upregulated chromatin regulator genes
UBE2C	3.03846	3.97758	15.2568	7.30587e-44	2.45925e-42	88.7548
HMGB3	2.90746	5.37579	15.7882	2.44151e-46	9.56888e-45	94.4292
TOP2A	2.77945	3.59468	17.0648	2.10614e-52	1.09205e-50	108.331
TFF1	2.09372	2.04898	5.56102	4.24981e-08	1.12146e-07	7.25517
HMGA1	1.97714	6.25842	13.9187	8.83596e-38	2.06041e-36	74.8215
AURKB	1.9456	2.31763	13.4759	8.01768e-36	1.68593e-34	70.3391
HJURP	1.74627	1.88843	13.2351	9.03568e-35	1.77065e-33	67.9313
AURKA	1.74531	2.70547	13.0676	4.80888e-34	9.04156e-33	66.2696
ASF1B	1.72915	2.82395	14.4384	4.09256e-40	1.10209e-38	80.1673
CDC6	1.69112	1.96563	13.6745	1.07023e-36	2.35423e-35	72.3413
CDK1	1.66529	2.80381	12.2087	2.13759e-30	3.13339e-29	57.9246
PBK	1.63082	1.91944	11.6639	3.7427e-28	4.6633e-27	52.7963
PRC1	1.61007	2.41962	13.7589	4.53126e-37	1.01549e-35	73.1958
EZH2	1.56206	2.19833	15.0377	7.5041e-43	2.35948e-41	86.4368
RAC3	1.5582	2.88085	10.6252	4.79211e-24	4.46978e-23	43.4154
RCC1	1.54938	3.91973	18.4718	3.07858e-59	2.17797e-57	124.007
KAT2A	1.54925	4.01945	15.6699	8.74112e-46	3.27224e-44	93.1597
LMNB1	1.53365	3.41927	13.1522	2.06954e-34	3.96706e-33	67.1076
TOX3	1.51042	2.14526	9.09399	1.88991e-18	1.16521e-17	30.661
UHRF1	1.49038	1.68102	13.7808	3.62173e-37	8.17141e-36	73.4186
BUB1	1.43415	1.95533	12.0368	1.10721e-29	1.53922e-28	56.2913
ATAD2	1.28114	2.64596	11.4368	3.09491e-27	3.59337e-26	50.6998
TTK	1.22751	1.38528	11.2388	1.91425e-26	2.09302e-25	48.8919
TONSL	1.20956	1.85189	12.5981	4.92573e-32	8.0391e-31	61.6697
RAD54L	1.17788	1.30157	11.8176	8.83849e-29	1.15017e-27	54.2289
CIT	1.1666	2.75219	6.1924	1.18545e-09	3.60909e-09	10.7391
ORC1	1.15749	1.43527	11.5008	1.71147e-27	2.02945e-26	51.2876
ZNF217	1.13562	3.75042	11.4382	3.05735e-27	3.5547e-26	50.7119
FOXA1	1.13167	4.00205	7.5383	2.06414e-13	8.64599e-13	19.2218
APOBEC3B	1.1203	1.88909	7.51839	2.36916e-13	9.87898e-13	19.0862
IDH2	1.10501	5.54422	11.0233	1.36138e-25	1.40654e-24	46.9461
CBX2	1.10175	1.60601	8.41012	3.77843e-16	1.95369e-15	25.43
CHEK1	1.09172	1.5838	11.5479	1.10429e-27	1.32833e-26	51.7224
TDRKH	1.09168	2.6988	13.0161	8.02166e-34	1.47988e-32	65.7611
CBX3	1.07008	5.38812	15.0468	6.81861e-43	2.15613e-41	86.5322
EXOSC5	1.06705	3.67268	11.1637	3.80156e-26	4.05824e-25	48.2113
CHAF1B	1.05077	1.66423	13.1566	1.9803e-34	3.80473e-33	67.1514
RAD51	1.03941	1.47126	11.5302	1.30201e-27	1.56055e-26	51.559
CBX4	1.03087	3.87897	13.5851	2.653e-36	5.73764e-35	71.4386
PCNA	1.02854	5.69666	10.448	2.27605e-23	2.02671e-22	41.8713
HDGF	1.02296	6.59418	13.0317	6.87631e-34	1.27563e-32	65.9142
FOXP3	1.00135	1.52006	11.2821	1.2876e-26	1.42559e-25	49.2853
MRGBP	0.979365	3.17777	13.3689	2.35697e-35	4.82255e-34	69.2671
KDM5B	0.978773	3.32998	13.3666	2.41332e-35	4.93181e-34	69.2436
FBXL19	0.9691	2.67064	11.3565	6.49944e-27	7.38697e-26	49.9636
ANP32E	0.958359	4.83299	8.05869	5.10492e-15	2.41587e-14	22.8634
EXOSC4	0.943957	3.88813	9.46289	9.60301e-20	6.57368e-19	33.6069
PYGO2	0.942706	4.4394	14.4429	3.90504e-40	1.05499e-38	80.214
PARP1	0.929118	4.66488	12.2324	1.70292e-30	2.51388e-29	58.1504
PKM	0.920488	7.11106	10.8387	7.1704e-25	7.05462e-24	45.2985
CBX8	0.913374	1.91508	14.0555	2.16468e-38	5.27612e-37	76.2203
PRKDC	0.904293	3.73138	8.79341	2.01258e-17	1.14643e-16	28.3242
RCOR2	0.904218	1.13833	7.52086	2.32895e-13	9.72347e-13	19.1031
HELLS	0.89967	1.17156	10.9943	1.76901e-25	1.8131e-24	46.6863
LMNB2	0.890576	3.69173	8.71666	3.64814e-17	2.0371e-16	27.7369
CHD1L	0.883084	4.20392	11.5612	9.7632e-28	1.18035e-26	51.8447
VPS72	0.874933	3.71154	11.9598	2.30248e-29	3.11525e-28	55.5644
ACTL6A	0.870435	3.92631	10.9959	1.74395e-25	1.78962e-24	46.7005
SMYD5	0.861353	3.47649	15.337	3.10551e-44	1.06467e-42	89.6062
DBF4	0.859931	1.84777	10.8513	6.40579e-25	6.31353e-24	45.4103
SUV39H2	0.843507	1.85311	12.1129	5.35419e-30	7.62744e-29	57.0128
YWHAZ	0.842993	6.70487	11.0486	1.0819e-25	1.12685e-24	47.1739
ERCC6L	0.831095	0.886699	11.3074	1.02106e-26	1.14108e-25	49.5154
SIRT7	0.805805	2.56064	11.6252	5.37519e-28	6.62318e-27	52.437
APEX1	0.799839	6.18553	10.9256	3.28535e-25	3.30236e-24	46.0724
DPY30	0.78982	4.07304	11.4304	3.28532e-27	3.8118e-26	50.6405
HMGN1	0.789217	4.90104	12.8481	4.23403e-33	7.41778e-32	64.1079
HDAC1	0.782862	5.00092	12.0432	1.04164e-29	1.45411e-28	56.3519
TRIM27	0.778362	3.52921	14.8273	6.94282e-42	2.09237e-40	84.2231
NOC2L	0.777429	4.06249	9.77366	7.32501e-21	5.42343e-20	36.153
IDH1	0.773161	5.06447	7.70255	6.55352e-14	2.85686e-13	20.3503
CHAF1A	0.751421	2.26148	9.29007	3.91822e-19	2.56745e-18	32.2163
CBX1	0.749052	4.55981	9.64475	2.14482e-20	1.53452e-19	35.0898
NEK6	0.747385	4.1693	10.0085	1.00983e-21	7.94301e-21	38.1146
DNMT3B	0.744961	1.10954	7.91873	1.40657e-14	6.43045e-14	21.865
HLTF	0.744305	3.00885	7.97713	9.23006e-15	4.27239e-14	22.2799
HMGB2	0.737624	4.75109	6.95502	1.03757e-11	3.75531e-11	15.375
DNMT3A	0.732309	2.33005	9.47271	8.86071e-20	6.08049e-19	33.6865
USP21	0.728621	3.28261	11.1225	5.53251e-26	5.86109e-25	47.8391
MEN1	0.727069	3.47188	10.1776	2.37717e-22	1.95418e-21	39.547
EHMT2	0.719658	3.41272	9.22143	6.81505e-19	4.36289e-18	31.6691
CLNS1A	0.719396	3.96798	12.2528	1.40012e-30	2.07976e-29	58.3448
PPM1G	0.718831	5.08554	10.8058	9.62377e-25	9.41291e-24	45.0067
RUVBL1	0.717245	3.07908	9.62793	2.46588e-20	1.76092e-19	34.9518
BRDT	0.707403	0.657106	4.69746	3.35702e-06	7.43649e-06	3.03541
BRCC3	0.701146	3.33601	10.7584	1.46823e-24	1.41697e-23	44.588
BRCA1	0.696341	1.36663	8.08856	4.10472e-15	1.95639e-14	23.0782
RMI1	0.694762	2.29791	10.3936	3.66117e-23	3.21551e-22	41.4002
NASP	0.689442	3.63341	8.15957	2.43841e-15	1.18245e-14	23.5915
PPP4C	0.680327	5.31014	8.95752	5.5707e-18	3.30756e-17	29.5929
PRMT5	0.673134	3.94322	8.54474	1.36374e-16	7.30945e-16	26.4354
ZNF687	0.671403	3.11785	9.21071	7.42851e-19	4.73926e-18	31.5839
WDR77	0.670803	3.40509	11.2916	1.17953e-26	1.31115e-25	49.3723
PCGF3	0.666292	3.11579	9.36949	2.05785e-19	1.37322e-18	32.8531
MOV10	0.664284	3.37774	8.95141	5.8454e-18	3.46819e-17	29.5453
BARD1	0.663489	1.60585	9.56359	4.19755e-20	2.93846e-19	34.4255
MORF4L2	0.660571	6.37652	10.3662	4.64931e-23	4.04296e-22	41.1635
NPAS2	0.660263	1.44862	7.11715	3.58063e-12	1.35131e-11	16.4187
NPM1	0.656226	6.77904	8.19008	1.94747e-15	9.54022e-15	23.8131
KDM1A	0.653192	4.03131	10.4662	1.94103e-23	1.73117e-22	42.029
NAT10	0.649661	3.61065	11.0861	7.7047e-26	8.09551e-25	47.5106
OGT	0.64851	4.12093	5.61009	3.25485e-08	8.67129e-08	7.5141
ASCL1	0.646166	0.95625	2.29941	0.0218679	0.0309151	-5.1454
CDK5	0.646124	2.70571	9.17862	9.61094e-19	6.09203e-18	31.3293
TOPBP1	0.645739	2.79985	7.6963	6.8484e-14	2.98151e-13	20.307
ACTR5	0.644658	2.49284	10.9648	2.30859e-25	2.3517e-24	46.4223
PDP1	0.634262	3.07923	6.32682	5.31186e-10	1.66361e-09	11.5229
ATXN7L3	0.629622	3.96902	10.7406	1.72172e-24	1.65206e-23	44.4301
SS18L1	0.628458	2.41841	7.57527	1.59706e-13	6.73858e-13	19.474
PRMT3	0.628104	1.96269	11.1913	2.95689e-26	3.18094e-25	48.4606
DNAJC2	0.618878	2.47466	9.64634	2.11668e-20	1.51609e-19	35.1029
BRPF3	0.617192	3.44132	7.25732	1.40516e-12	5.4674e-12	17.337
CHTOP	0.614941	4.12175	11.5111	1.55529e-27	1.85347e-26	51.3826
DBF4B	0.611024	1.14301	9.74545	9.27449e-21	6.81545e-20	35.9195
EXOSC1	0.602718	3.02023	12.5252	1.00235e-31	1.603e-30	60.9639
SETDB1	0.60156	2.96167	9.23032	6.34489e-19	4.07283e-18	31.7398
UCHL5	0.60132	2.89975	10.3018	8.13161e-23	6.91622e-22	40.6097
MSH6	0.60131	2.7553	8.6127	8.11647e-17	4.41697e-16	26.9475
TDRD5	0.600565	0.626443	5.80356	1.1158e-08	3.1106e-08	8.55459
MTA1	0.600453	3.02163	7.43975	4.07104e-13	1.66186e-12	18.5541
PARP2	0.598722	2.58088	8.47426	2.32868e-16	1.22417e-15	25.9075
BANF1	0.596936	5.96348	6.92673	1.24675e-11	4.48034e-11	15.1949
EYA2	0.595825	1.64518	3.13549	0.0018104	0.00297153	-2.90491
STK31	0.595538	0.820067	7.54035	2.03509e-13	8.53073e-13	19.2357
MASTL	0.595138	2.32415	7.75823	4.42292e-14	1.94791e-13	20.7372
DNMT1	0.594161	3.23629	7.0151	7.01122e-12	2.5716e-11	15.7594
JMJD4	0.588789	2.2898	10.3251	6.64466e-23	5.68919e-22	40.8097
Downregulated chromatin regulator genes
RBP1	-0.588312	2.05251	-4.94532	1.0207e-06	2.37612e-06	4.18048
SAP30L	-0.589696	2.50207	-10.3367	6.00585e-23	5.16379e-22	40.9099
TOX	-0.595401	1.96199	-5.03938	6.40923e-07	1.52629e-06	4.62912
USP44	-0.608187	1.03579	-7.23199	1.6657e-12	6.45106e-12	17.1699
NAP1L5	-0.633163	1.41846	-9.45198	1.04997e-19	7.15814e-19	33.5186
SATB1	-0.634302	1.56212	-7.53389	2.12827e-13	8.91237e-13	19.1917
ERBB4	-0.636094	0.372908	-12.1687	3.13881e-30	4.55305e-29	57.5431
PRDM16	-0.645292	1.23042	-5.55286	4.44164e-08	1.16986e-07	7.21232
JAK2	-0.647051	2.07152	-7.87552	1.91814e-14	8.66953e-14	21.5596
ZHX3	-0.647524	1.86379	-10.4174	2.97541e-23	2.62288e-22	41.6058
MECOM	-0.648164	2.89556	-4.71363	3.11106e-06	6.91182e-06	3.10846
CBX6	-0.648462	3.03706	-5.88529	7.03482e-09	1.99615e-08	9.00346
TLE4	-0.656471	1.68353	-8.70821	3.89433e-17	2.16949e-16	27.6724
IGFBP7	-0.668384	7.01002	-5.79839	1.14866e-08	3.19591e-08	8.52635
ARID5A	-0.717862	3.0754	-7.99958	7.84505e-15	3.6546e-14	22.4401
USP12	-0.743991	3.08968	-11.4398	3.01181e-27	3.50419e-26	50.7268
TSPYL1	-0.757805	4.48231	-11.2465	1.78379e-26	1.95421e-25	48.9619
FOXO1	-0.794751	2.57516	-8.03922	5.8828e-15	2.76986e-14	22.7237
MYO1C	-0.852362	4.90548	-11.4023	4.25999e-27	4.90855e-26	50.3827
IFIT3	-0.862423	4.11447	-6.4526	2.47456e-10	7.96824e-10	12.2694
TCF4	-0.876183	1.71848	-10.382	4.05136e-23	3.54887e-22	41.2999
ZBTB4	-0.903702	4.30733	-11.72	2.21312e-28	2.7908e-27	53.3178
SMARCA2	-0.916085	3.53348	-10.0837	5.31873e-22	4.25907e-21	38.7495
KAT2B	-0.968075	2.35834	-11.9008	4.0271e-29	5.37891e-28	55.0093
MOCS1	-1.02974	1.847	-12.5754	6.14832e-32	9.99536e-31	61.4494
JDP2	-1.11894	2.56815	-14.9165	2.70694e-42	8.32323e-41	85.1602
APBB1	-1.1933	2.355	-12.5655	6.7667e-32	1.09793e-30	61.3542
ARRB1	-1.2165	3.41839	-11.9991	1.58498e-29	2.16909e-28	55.9351
TOX2	-1.22997	1.67291	-12.8976	2.59585e-33	4.596e-32	64.594
ZBTB16	-1.36056	0.833857	-12.3572	5.11538e-31	7.84985e-30	59.3449
CBX7	-1.38937	2.23568	-15.6287	1.36239e-45	5.02128e-44	92.718
GADD45B	-1.41592	4.82827	-11.0573	1.00076e-25	1.04494e-24	47.2513
DUSP1	-1.76856	7.0569	-10.4436	2.36706e-23	2.10439e-22	41.8324
