# Supplementary material for: A robust six-gene prognostic signature based on two prognostic subtypes constructed by chromatin regulators is correlated with immunological features and therapeutic response in lung adenocarcinoma
Source: Aging (Albany NY). 2023 Nov 7;15(21):12330–68. doi: 10.18632/aging.205183 (PMC10683604; doi:10.18632/aging.205183)
Supplement: Supplementary Table 3 [file aging-15-205183-s004.xls]

## Sheet: geneSigExp_27gene - 副本
Supplementary Table 3. Gene expression profiles of prognostic genes between LUAD and normal lung tissues.
Gene symbol	N10	N1	N2	N3	N4	N5	N6	N7	N8	N9	T10	T1	T2	T3	T4	T5	T6	T7	T8	T9
ANP32E	9.1102	10.2921	10.2995	10.2634	10.2463	10.2339	8.96575	10.5651	9.98713	10.4706	10.0285	12.6072	10.5778	11.3505	11.0317	10.1371	9.7852	10.2309	12.4015	10.7621
ATAD2	7.79259	8.16736	8.43119	8.50155	9.105	9.26556	7.67998	9.46455	8.77523	8.40524	8.52595	8.29808	8.86503	10.4332	9.58418	9.53471	8.17605	9.07027	10.1496	9.53642
AURKA	4.97742	5.72967	6.13701	6.64817	6.60995	5.65625	5.76108	5.60304	6.19863	6.08389	6.96532	6.59403	6.70817	7.40277	7.96049	8.52767	7.16259	6.07699	9.30805	7.13209
BUB1	5.06853	5.77669	5.91834	6.72716	7.15333	5.7824	5.86021	5.95611	6.33188	6.16347	6.30939	7.34199	7.2422	7.13929	8.28869	7.65623	6.07086	6.92865	8.74824	7.6126
CBX3	10.5861	10.9918	11.074	11.3255	11.2805	11.0686	10.6855	11.0623	11.3436	10.9886	11.39	12.1464	11.0432	12.7329	11.3793	11.5763	11.8005	11.3261	12.4774	11.5041
CBX6	11.9822	10.6455	11.3473	10.5161	10.4264	10.6264	10.5085	11.1249	10.617	11.2598	9.92583	11.3361	11.315	11.4432	10.1159	10.7691	10.2496	10.4389	10.6217	11.3592
CBX7	10.97	10.8636	11.2403	10.7311	10.5992	10.9399	10.5512	11.2302	10.8192	11.3013	10.5429	10.2979	10.7051	10.1438	9.7929	10.52	9.53555	10.5425	9.21296	11.0082
CDK1	5.63607	7.10378	6.7259	7.58542	7.70554	6.33434	7.03097	6.91729	7.20768	6.65027	7.50487	8.22102	8.20431	8.02428	8.98149	7.76411	7.82971	7.41248	9.8273	7.97656
CHEK1	8.05023	6.32518	6.62885	6.39496	6.82368	6.14233	7.11273	6.05652	6.36333	6.45933	6.88104	6.39689	6.91892	8.14011	7.60075	6.41024	6.88228	6.83729	8.85183	7.00978
CIT	8.92971	9.13667	8.99102	8.46921	9.75573	8.95601	8.27494	9.64931	8.66982	7.76759	12.9608	9.53591	8.11753	9.16646	10.2151	13.8728	8.48925	9.85201	11.1207	9.80698
ERCC6L	4.38978	3.86064	4.38606	5.03323	5.39911	4.32914	4.36383	4.44799	4.92003	4.74527	4.4091	6.16803	5.8034	6.65207	7.18846	5.81839	5.16235	5.71201	7.04026	5.96679
HELLS	4.97742	6.24451	6.50922	6.9219	7.12142	6.31792	5.86021	6.42941	6.03206	6.5653	6.30939	7.02759	7.33315	8.58971	8.05766	7.16929	6.29518	7.20915	7.97373	7.73073
HJURP	4.53147	5.06782	4.71313	6.05195	6.24409	4.80563	3.48739	5.33824	5.23302	5.2764	5.88061	6.34303	6.25822	6.60487	7.65008	5.71315	6.69906	6.01537	7.98337	6.6099
HMGA1	10.4239	9.46123	9.12617	9.41559	10.1028	9.31982	10.2447	9.08626	9.59318	9.10002	9.77432	11.4268	9.73242	10.6102	10.2521	10.1803	12.0248	10.8822	12.0281	10.5064
LMNB1	5.74777	7.71091	7.87292	8.31033	9.16871	8.2747	6.34207	7.83966	7.82836	7.92875	8.66531	9.00053	8.86503	9.82424	9.66688	8.28229	8.1549	8.50511	10.058	9.29132
MOCS1	10.76	10.0343	10.4476	9.75429	9.50118	10.2789	10.156	9.96781	10.0255	9.86556	8.95392	8.86151	9.85494	8.70005	9.40916	9.56483	9.06995	8.80772	8.69057	8.64314
NPAS2	8.0177	7.55341	7.80496	6.21818	6.86284	8.34081	6.23608	8.3314	6.60588	7.41108	9.08046	9.1817	8.04324	7.17197	8.51462	8.52767	8.50604	10.0089	8.23815	8.61271
PBK	2.72177	4.60859	4.76939	6.18645	5.2044	3.99092	4.50378	4.57043	4.82868	4.6895	5.3362	5.96835	6.30416	6.26822	7.35083	5.76676	5.21958	6.01537	7.50977	5.32791
PRC1	4.97742	6.97035	6.93737	7.86953	7.74092	7.11869	5.76108	7.1871	7.19903	6.99122	7.1515	7.81841	8.04772	8.02428	9.09516	7.32726	7.64988	7.88614	9.53795	8.1676
PRKDC	9.17061	10.3343	11.0185	10.5931	11.3416	10.9413	9.10183	11.0346	10.4147	11.2218	10.1399	11.6932	11.3526	10.6258	11.8441	11.7366	9.65828	11.3103	12.4189	12.2865
RAD51	5.90021	5.86624	5.63061	5.69222	5.88421	5.60242	5.76108	6.15027	5.04616	5.65693	5.77667	6.39689	6.33397	6.07313	6.62214	6.0728	6.5767	6.09695	6.89425	6.54075
RMI1	5.80044	7.20905	7.59416	7.52372	7.70554	7.32904	6.03968	7.7174	7.48166	7.73566	6.88104	7.30509	8.09174	8.57149	8.26176	7.73125	6.4889	7.7428	8.28956	7.7512
TOP2A	5.57668	7.13974	7.0486	8.42942	8.9444	7.16513	5.76108	7.43649	7.05305	7.40296	8.42354	10.2908	9.18853	10.4491	11.1286	9.59798	8.25765	8.70517	11.4712	9.56559
TTK	2.72177	5.02851	4.59249	5.4969	5.28565	5.11335	4.01931	5.12817	4.56701	5.16212	5.51001	5.7908	6.2737	6.58068	6.86892	6.11451	6.00875	5.25304	7.65567	6.48045
UCHL5	8.50609	9.34694	9.4449	9.38645	9.53984	9.57793	8.59899	9.57085	9.34777	9.40394	9.21651	10.507	9.55517	9.74112	9.70735	8.87591	8.86396	9.53083	9.85512	9.55835
UHRF1	4.38978	4.988	5.06373	6.17032	6.60995	5.7824	5.03505	5.49156	5.72616	5.44787	5.25999	5.52346	6.71948	6.60487	8.19214	6.0728	4.90528	6.46193	7.68553	7.30147
YWHAZ	12.5842	13.2357	13.1539	13.2206	13.3674	13.1101	12.66	13.5347	13.2739	13.2241	12.5461	12.6503	13.1814	14.5959	13.4569	13.236	13.4462	14.0709	14.6159	13.411
ANGPTL4	9.70773	6.21092	6.0319	6.5522	6.3401	6.77957	6.89886	6.42941	7.33943	7.50503	6.66746	4.96494	7.46633	9.83701	8.66264	8.89382	13.4982	6.63498	10.5318	6.3915
CCL20	4.77375	5.86624	5.71512	6.27958	6.2038	5.68241	6.12153	8.37825	5.59843	5.03723	6.98852	4.69078	5.59546	7.8335	7.657	7.69763	13.3099	11.5908	9.35149	5.81766
CENPK	4.04058	5.72967	5.9418	6.63652	6.99795	5.92016	4.94483	6.30484	5.82056	5.90989	6.32777	6.94595	6.94803	7.50242	7.65008	5.81839	6.39533	6.84903	7.2941	7.44042
CPS1	5.99337	5.46739	6.7259	6.35278	6.18322	5.7824	5.53889	6.42941	5.65094	6.75623	5.51001	5.06032	6.48767	5.27249	6.17654	5.14716	5.27449	5.57526	5.62562	6.16454
GJB3	5.85121	4.66264	4.71313	4.69901	5.02556	5.07353	6.56245	5.43227	4.50741	4.56996	2.72177	2.72177	5.32074	4.65301	6.42485	3.66689	8.71305	8.78657	5.99753	4.20264
TPSB2	14.8912	10.1564	10.9924	9.30085	10.8342	11.5842	13.2114	10.5861	11.5401	10.8502	12.744	7.87612	10.4719	5.67268	11.372	10.006	11.3749	10.4006	10.2368	10.9624
