# Supplementary material for: A robust six-gene prognostic signature based on two prognostic subtypes constructed by chromatin regulators is correlated with immunological features and therapeutic response in lung adenocarcinoma
Source: Aging (Albany NY). 2023 Nov 7;15(21):12330–68. doi: 10.18632/aging.205183 (PMC10683604; doi:10.18632/aging.205183)
Supplement: Supplementary Table 5 [file aging-15-205183-s006.xls]

## Sheet: Supplementary Table S4
Supplementary Table 5. Key differentially expressed genes between two molecular prognostic subtypes.
Gene symbol	logFC	AveExpr	t	P.Value	adj.P.Val	B
Upregulated genes
UBE2C	2.27529	4.31519	24.4659	4.7e-86	3.41e-83	185.548
MYBL2	2.21744	3.71819	24.5054	3.07e-86	2.44e-83	185.973
CDC20	2.01692	3.7493	27.8855	5.93e-102	4.95e-98	221.978
TPX2	2.00959	3.60968	27.0478	4.28e-98	2.38e-94	213.14
BIRC5	1.88822	3.13598	26.4598	2.26e-95	5.39e-92	206.9
TOP2A	1.80589	3.90351	22.8908	1.26e-78	4.11e-76	168.526
KIF2C	1.66021	2.5716	26.1529	6.04e-94	1.12e-90	203.632
CCNB1	1.65968	3.7708	26.6308	3.64e-96	1.01e-92	208.718
ANLN	1.6513	2.74621	21.3595	2.22e-71	5.37e-69	151.914
RRM2	1.64657	3.1918	23.0852	1.51e-79	5.27e-77	170.632
AURKB	1.64568	2.53381	24.306	2.65e-85	1.58e-82	183.825
CEP55	1.63157	2.72276	26.7235	1.35e-96	4.52e-93	209.702
FOXM1	1.61716	2.67665	23.1319	9.11e-80	3.34e-77	171.137
HJURP	1.61095	2.08246	28.5248	7.05e-105	1.18e-100	228.678
FGB	1.59048	2.20123	5.89791	7.01e-09	3.6e-08	9.13929
CCNA2	1.58089	2.74775	26.052	1.78e-93	2.7e-90	202.556
MELK	1.57999	2.29344	24.5069	3.02e-86	2.44e-83	185.99
NEK2	1.578	2.30301	26.1324	7.52e-94	1.26e-90	203.413
MMP12	1.57198	3.24257	10.2498	2.13e-22	5.34e-21	39.7814
KIFC1	1.56274	2.81743	23.9148	1.84e-83	9.32e-81	179.605
CCNB2	1.54934	2.76209	26.9661	1.02e-97	4.26e-94	212.275
CDK1	1.54297	2.98884	23.8303	4.61e-83	2.2e-80	178.691
CDKN3	1.5323	2.28295	24.4905	3.6e-86	2.73e-83	185.813
DLGAP5	1.52808	2.18376	25.11	4.46e-89	4.66e-86	192.475
CDCA5	1.51765	2.48835	24.5312	2.32e-86	2.04e-83	186.252
PBK	1.50305	2.10065	21.395	1.51e-71	3.7e-69	152.3
KIF4A	1.50002	2.14887	24.4452	5.88e-86	3.93e-83	185.325
TROAP	1.49979	1.92058	24.1009	2.45e-84	1.36e-81	181.613
CENPA	1.49457	1.82381	26.3226	9.81e-95	2.05e-91	205.44
NUF2	1.48919	2.00573	25.4042	1.87e-90	2.61e-87	195.63
UBE2T	1.48672	3.9451	21.9637	3.06e-74	8.51e-72	158.472
AURKA	1.48294	2.8994	22.9054	1.07e-78	3.58e-76	168.684
CDCA8	1.47534	2.90737	24.4064	8.94e-86	5.53e-83	184.908
SLC2A1	1.47102	4.60301	13.0896	1.24e-33	7.29e-32	65.4373
TK1	1.46516	4.73018	17.766	1.76e-54	2.38e-52	113.178
MKI67	1.46188	2.51673	20.7151	2.49e-68	5.46e-66	144.924
TRIP13	1.45838	2.50762	20.5641	1.29e-67	2.72e-65	143.288
KPNA2	1.44975	4.90597	24.9141	3.7e-88	3.63e-85	190.371
PLK1	1.44004	2.44893	25.2103	1.51e-89	1.81e-86	193.551
NCAPH	1.4226	2.16023	24.5377	2.16e-86	2e-83	186.322
ZWINT	1.41292	3.60574	23.1309	9.21e-80	3.34e-77	171.127
CENPW	1.40467	3.04939	21.4665	6.91e-72	1.72e-69	153.076
NUSAP1	1.3992	3.29237	23.6681	2.68e-82	1.24e-79	176.939
SPAG5	1.39369	2.53422	23.4273	3.67e-81	1.61e-78	174.335
PRR11	1.39154	2.16189	24.0702	3.41e-84	1.84e-81	181.282
NCAPG	1.37572	1.79487	25.381	2.41e-90	3.09e-87	195.381
BUB1	1.36426	2.11468	24.4511	5.51e-86	3.84e-83	185.389
CDC6	1.35066	2.15353	21.998	2.1e-74	5.95e-72	158.844
KIF18B	1.34407	1.70976	22.6375	1.98e-77	6.24e-75	165.78
CENPF	1.3396	2.20494	19.4626	2.03e-62	3.39e-60	131.372
PRC1	1.33912	2.59851	24.4247	7.34e-86	4.71e-83	185.105
CDC45	1.3364	2.01781	21.9515	3.49e-74	9.41e-72	158.338
FAM83D	1.32973	2.5339	19.1144	8.82e-61	1.39e-58	127.619
KIF11	1.32023	2.4788	23.5537	9.29e-82	4.19e-79	175.702
BUB1B	1.31742	1.92857	24.0554	4.01e-84	2.09e-81	181.122
KIF20A	1.31397	2.3639	23.3138	1.26e-80	5.26e-78	173.107
NDC80	1.29697	1.88622	22.4691	1.24e-76	3.76e-74	163.954
SAPCD2	1.27636	2.19192	19.6036	4.4e-63	7.82e-61	132.894
FAM83A	1.27223	3.72509	8.95487	7.8e-18	1.23e-16	29.3867
PTTG1	1.26919	3.41439	17.0062	5.74e-51	6.94e-49	105.13
KIF23	1.26917	1.79235	25.1525	2.82e-89	3.14e-86	192.931
CDT1	1.26208	2.3534	19.478	1.72e-62	2.93e-60	131.539
C15orf48	1.25639	4.58544	8.72639	4.51e-17	6.55e-16	27.654
HMMR	1.2543	2.0406	20.7577	1.56e-68	3.48e-66	145.386
ASF1B	1.25389	3.01607	20.6438	5.41e-68	1.17e-65	144.151
UBE2S	1.24968	2.75003	19.3804	4.95e-62	8.02e-60	130.486
HMGA1	1.23971	6.4781	15.2065	8.27e-43	7.04e-41	86.4421
MCM4	1.23929	3.6012	19.853	2.94e-64	5.45e-62	135.589
PLOD2	1.23912	3.57194	12.1993	5.91e-30	2.77e-28	57.0318
RACGAP1	1.23801	2.97666	23.3196	1.18e-80	5.07e-78	173.169
TTK	1.22207	1.52167	23.0965	1.34e-79	4.76e-77	170.754
PCLAF	1.21899	2.30554	20.4528	4.32e-67	8.8e-65	142.082
MAD2L1	1.21447	1.93029	22.3141	6.71e-76	1.93e-73	162.273
RAD51AP1	1.21134	2.08506	21.3554	2.32e-71	5.53e-69	151.87
UCHL1	1.2023	3.35628	6.43959	2.95e-10	1.85e-09	12.2307
IQGAP3	1.20191	2.29473	18.0294	1.05e-55	1.47e-53	115.985
CKS2	1.19709	5.24019	15.8223	1.43e-45	1.38e-43	92.7664
GGH	1.19081	2.83137	12.6746	6.68e-32	3.55e-30	61.4821
PIMREG	1.18572	1.5118	20.4981	2.64e-67	5.44e-65	142.572
EIF4EBP1	1.17863	4.96411	13.1674	5.86e-34	3.48e-32	66.1849
PAEP	1.17756	2.64284	4.57117	6.2e-06	2.02e-05	2.58169
GINS1	1.1763	2.08912	19.899	1.78e-64	3.34e-62	136.087
DEPDC1	1.17496	1.32798	23.1545	7.12e-80	2.77e-77	171.383
ECT2	1.17321	3.18265	18.31	5.17e-57	7.64e-55	118.983
GTSE1	1.16429	1.68949	22.4357	1.78e-76	5.32e-74	163.592
SKA3	1.15951	1.57693	24.1841	9.94e-85	5.72e-82	182.511
EXO1	1.15592	1.52879	21.8503	1.05e-73	2.79e-71	157.241
SKA1	1.15297	1.40802	23.162	6.57e-80	2.68e-77	171.463
E2F1	1.14757	3.08717	15.816	1.53e-45	1.47e-43	92.7012
PFN2	1.14631	4.36733	10.4399	4.21e-23	1.13e-21	41.3848
CYP24A1	1.13936	2.9457	6.15518	1.6e-09	9e-09	10.5787
SLC7A5	1.13899	4.37072	10.6941	4.7e-24	1.38e-22	43.5565
PSAT1	1.13816	3.33705	11.0254	2.58e-25	8.45e-24	46.4346
CPS1	1.13706	1.59962	5.09797	4.97e-07	1.93e-06	5.0077
RECQL4	1.13119	2.54367	15.5372	2.75e-44	2.51e-42	89.8279
CKAP2L	1.12712	1.45137	23.1596	6.74e-80	2.68e-77	171.437
DSP	1.12656	4.77317	9.16097	1.56e-18	2.66e-17	30.9769
MCM2	1.12602	3.36426	16.4617	1.79e-48	1.98e-46	99.4139
MAGEA3	1.12527	1.00973	6.94014	1.3e-11	9.78e-11	15.2886
SPC25	1.12186	1.70846	22.863	1.7e-78	5.46e-76	168.224
SPC24	1.12122	1.84375	21.3272	3.15e-71	7.42e-69	151.564
DEPDC1B	1.11731	1.42926	21.6268	1.2e-72	3.14e-70	154.815
UHRF1	1.11731	1.84662	19.8106	4.66e-64	8.45e-62	135.131
MCM10	1.11188	1.27532	22.9166	9.48e-79	3.23e-76	168.806
GINS2	1.11017	2.01056	18.1701	2.32e-56	3.34e-54	117.487
LMNB1	1.10991	3.58967	17.5437	1.89e-53	2.45e-51	110.816
CDCA3	1.10874	1.46272	23.8664	3.12e-83	1.53e-80	179.081
CENPU	1.09908	2.48369	17.5522	1.73e-53	2.26e-51	110.906
RPL39L	1.09897	3.49467	10.7718	2.39e-24	7.19e-23	44.2267
CCNE1	1.09083	1.86266	14.8894	2.12e-41	1.68e-39	83.2179
ARHGAP11A	1.08797	1.75134	20.8329	6.89e-69	1.55e-66	146.201
PFKP	1.08238	4.82058	11.6641	8.28e-28	3.43e-26	52.1263
ASPM	1.07941	1.40938	19.4668	1.94e-62	3.27e-60	131.418
TACC3	1.07696	3.00732	19.506	1.27e-62	2.18e-60	131.841
TYMS	1.07425	3.20929	17.372	1.18e-52	1.49e-50	108.995
ESPL1	1.0629	1.29334	21.564	2.39e-72	6.13e-70	154.133
DSCC1	1.06132	1.80835	20.584	1.04e-67	2.22e-65	143.503
MTHFD2	1.05962	4.01403	16.625	3.22e-49	3.65e-47	101.123
ORC1	1.0506	1.56388	20.2255	5.12e-66	9.95e-64	139.62
RAD54L	1.04862	1.43244	20.4253	5.83e-67	1.17e-64	141.783
TXNRD1	1.04595	5.13092	8.56245	1.56e-16	2.12e-15	26.4307
EGLN3	1.04525	2.67262	8.69711	5.64e-17	8.08e-16	27.4343
PKMYT1	1.04468	1.61238	19.6284	3.36e-63	6.04e-61	133.163
HILPDA	1.04371	3.38331	11.5596	2.15e-27	8.61e-26	51.1825
FEN1	1.04019	3.71883	19.5318	9.6e-63	1.69e-60	132.119
CKS1B	1.03423	3.54843	16.2262	2.12e-47	2.25e-45	96.9568
ATAD2	1.03299	2.78831	16.4121	3.02e-48	3.3e-46	98.8952
TNNT1	1.02469	2.34738	6.25179	9.07e-10	5.31e-09	11.1328
RHOV	1.0242	3.18259	7.09326	4.8e-12	3.85e-11	16.2614
MYEOV	1.01928	1.62241	7.45887	4.2e-13	3.83e-12	18.6529
STEAP1	1.01595	3.39763	8.58165	1.35e-16	1.84e-15	26.5731
PRAME	1.00192	1.61163	6.18234	1.37e-09	7.77e-09	10.7338
CIP2A	0.997476	1.47816	19.9702	8.22e-65	1.56e-62	136.857
MCM6	0.996696	3.71513	18.2388	1.11e-56	1.63e-54	118.222
MAGEA6	0.991516	0.882167	6.55237	1.48e-10	9.73e-10	12.9031
RFC4	0.98933	2.70946	17.5874	1.19e-53	1.56e-51	111.279
STMN1	0.989089	4.39928	12.6863	5.97e-32	3.2e-30	61.5934
RAD51	0.98864	1.58675	22.3267	5.85e-76	1.71e-73	162.41
OIP5	0.98845	1.48672	19.0353	2.07e-60	3.21e-58	126.768
MCM7	0.982893	4.67193	16.3441	6.17e-48	6.64e-46	98.1855
CXCL10	0.977906	4.2593	6.81628	2.85e-11	2.06e-10	14.5144
FGL1	0.973808	1.90594	4.79116	2.22e-06	7.84e-06	3.56563
CTHRC1	0.972756	4.8934	8.18539	2.53e-15	3.01e-14	23.6821
CDCA2	0.972749	1.22449	21.9564	3.31e-74	9.06e-72	158.393
DTL	0.969165	1.96776	18.1631	2.5e-56	3.57e-54	117.413
SHCBP1	0.963733	1.68722	19.4618	2.05e-62	3.39e-60	131.364
CHEK1	0.96367	1.7051	19.2805	1.46e-61	2.34e-59	129.409
HMGB2	0.961349	4.83305	16.0357	1.55e-46	1.6e-44	94.9768
QPCT	0.957989	3.29277	6.39182	3.93e-10	2.43e-09	11.9488
H2AFX	0.957187	4.6906	16.225	2.15e-47	2.27e-45	96.9437
FANCI	0.957151	2.18914	19.0391	1.99e-60	3.11e-58	126.809
GAL	0.956432	0.8739	9.10431	2.43e-18	4.07e-17	30.5372
NCAPG2	0.95405	2.30467	17.3053	2.4e-52	3.01e-50	108.289
CDC25C	0.952595	1.1967	22.5188	7.21e-77	2.23e-74	164.494
KIF14	0.951598	1.13357	20.499	2.61e-67	5.44e-65	142.582
POC1A	0.948791	2.31489	20.1759	8.79e-66	1.69e-63	139.082
C17orf53	0.948688	1.55009	18.099	4.98e-56	7.04e-54	116.729
CALCA	0.94477	1.34273	3.70963	0.000232191	0.000583131	-0.858718
CTSV	0.940026	1.17734	12.6776	6.48e-32	3.46e-30	61.5111
CENPM	0.939501	2.35484	14.8766	2.41e-41	1.91e-39	83.0883
GAPDH	0.938712	9.3317	13.926	3.43e-37	2.32e-35	73.5815
EZH2	0.93726	2.3719	15.8884	7.2e-46	7.11e-44	93.4502
NEIL3	0.936853	1.11062	14.0656	8.55e-38	5.9e-36	74.9622
UCK2	0.934237	2.17805	12.5451	2.28e-31	1.18e-29	60.2612
COL11A1	0.930657	2.13412	6.16779	1.49e-09	8.42e-09	10.6507
ARNTL2	0.928964	2.1132	10.0938	7.91e-22	1.88e-20	38.4804
PLK4	0.924387	1.48497	20.3158	1.92e-66	3.81e-64	140.598
CDCA4	0.923902	3.02679	16.8525	2.92e-50	3.46e-48	103.512
GCLC	0.92196	3.01533	7.38554	6.9e-13	6.16e-12	18.1656
KIF15	0.920838	1.24246	21.0881	4.27e-70	9.9e-68	148.97
FKBP10	0.918885	4.62704	8.30431	1.06e-15	1.31e-14	24.539
MTFR2	0.914659	1.28	21.4856	5.61e-72	1.42e-69	153.283
CCL20	0.909551	3.56261	5.31715	1.63e-07	6.8e-07	6.08695
FAM111B	0.90644	1.84341	13.8969	4.57e-37	3.07e-35	73.295
SERPINB5	0.896496	1.19635	6.54856	1.52e-10	9.95e-10	12.8803
SGO1	0.896364	1.05457	23.1477	7.67e-80	2.91e-77	171.308
PMAIP1	0.896354	2.97343	9.12411	2.08e-18	3.5e-17	30.6906
NCAPD2	0.892037	3.72139	15.8348	1.26e-45	1.22e-43	92.8961
ERO1A	0.891604	4.748	12.3605	1.3e-30	6.4e-29	58.5312
GNG4	0.891527	0.893573	8.96678	7.12e-18	1.12e-16	29.4779
CENPE	0.889024	1.11656	19.8494	3.05e-64	5.6e-62	135.55
ORC6	0.888658	1.39389	19.446	2.43e-62	3.98e-60	131.194
RNASEH2A	0.887826	3.43627	15.5793	1.78e-44	1.64e-42	90.2609
LYPD3	0.886102	2.18397	6.94241	1.28e-11	9.65e-11	15.3029
ANGPTL4	0.884053	3.63117	5.99997	3.93e-09	2.08e-08	9.70405
H2AFZ	0.882596	5.99829	18.5051	6.33e-58	9.52e-56	121.073
KLK12	0.872998	1.29695	4.38695	1.42e-05	4.37e-05	1.79032
E2F8	0.87003	1.43598	17.1051	2.01e-51	2.49e-49	106.173
PCSK1	0.868075	0.806294	5.64068	2.92e-08	1.37e-07	7.75326
TIMELESS	0.866428	3.05447	15.1272	1.86e-42	1.54e-40	85.6333
PSRC1	0.862559	1.7893	17.9016	4.13e-55	5.61e-53	114.622
PCNA	0.861025	5.81094	15.192	9.6e-43	8.13e-41	86.2936
CENPN	0.857067	1.88908	19.2084	3.19e-61	5.07e-59	128.632
LMNB2	0.856092	3.79069	14.3198	6.72e-39	4.94e-37	77.49
TUBA1C	0.852564	4.73473	15.3429	2.03e-43	1.78e-41	87.8361
ALYREF	0.846901	5.25132	15.9734	2.97e-46	3.02e-44	94.3305
ABCC2	0.846736	0.853641	6.57527	1.29e-10	8.51e-10	13.0409
IGF2BP3	0.84425	1.00071	9.99514	1.8e-21	4.12e-20	37.664
CDC25A	0.844114	1.12144	20.8334	6.85e-69	1.55e-66	146.207
S100P	0.843173	5.36717	3.18998	0.00151728	0.003281	-2.60683
MMP1	0.841819	3.99097	4.35669	1.62e-05	4.95e-05	1.66317
LOXL2	0.841243	3.01018	8.5898	1.27e-16	1.74e-15	26.6336
KNSTRN	0.840607	2.30728	17.2704	3.48e-52	4.33e-50	107.92
HMGB3	0.836244	5.69884	6.78155	3.56e-11	2.54e-10	14.2994
SULF1	0.835084	3.77586	7.01826	7.82e-12	6.1e-11	15.7828
DTYMK	0.833874	3.73281	16.8363	3.47e-50	4.07e-48	103.341
AKR1B10	0.833522	2.11551	3.43772	0.000638409	0.00148266	-1.80466
NME1	0.830438	4.10203	13.1519	6.81e-34	4.03e-32	66.0355
CENPI	0.827218	1.09033	19.508	1.24e-62	2.16e-60	131.862
POLE2	0.826774	1.56024	15.9619	3.35e-46	3.39e-44	94.2109
MELTF	0.823637	1.57545	9.11047	2.32e-18	3.89e-17	30.5849
KRT6A	0.821385	1.98259	3.84464	0.000137227	0.000359001	-0.3638
GJB2	0.821256	3.18509	5.9066	6.68e-09	3.44e-08	9.18705
MND1	0.818916	1.54577	16.0604	1.2e-46	1.24e-44	95.2329
INCENP	0.818847	2.57188	15.4475	6.93e-44	6.19e-42	88.9068
COCH	0.813561	1.12289	9.30496	4.99e-19	8.96e-18	32.1028
AUNIP	0.812805	1.00822	20.2616	3.46e-66	6.8e-64	140.011
TMPO	0.811245	3.66826	15.7291	3.77e-45	3.57e-43	91.8039
TEDC2	0.80976	1.58635	15.847	1.11e-45	1.08e-43	93.0221
CLSPN	0.802115	1.13195	15.6514	8.43e-45	7.86e-43	91.0029
SPP1	0.799938	6.91927	4.39772	1.35e-05	4.18e-05	1.83576
LRFN4	0.796893	2.52987	9.57822	5.56e-20	1.09e-18	34.2727
DBF4	0.795885	1.94332	18.9282	6.6e-60	1.01e-57	125.615
ISG15	0.792056	6.0443	6.06443	2.71e-09	1.47e-08	10.065
STRIP2	0.790686	1.25509	10.2352	2.4e-22	6e-21	39.6591
EME1	0.789685	1.15229	17.9829	1.73e-55	2.41e-53	115.489
CENPH	0.789519	2.16392	16.7593	7.81e-50	9.06e-48	102.532
C19orf48	0.788888	3.75135	13.0271	2.28e-33	1.31e-31	64.8378
SGO2	0.788487	1.3742	18.3989	1.99e-57	2.96e-55	119.935
CSAG1	0.787022	0.766292	5.63565	3e-08	1.4e-07	7.72669
SFRP2	0.781988	5.22317	4.73817	2.86e-06	9.88e-06	3.32478
WDHD1	0.781054	1.71669	15.0585	3.77e-42	3.07e-40	84.9338
CDC7	0.779888	1.88004	14.1776	2.79e-38	1.98e-36	76.074
CKAP2	0.7769	2.6629	15.4172	9.47e-44	8.36e-42	88.5971
GREM1	0.773988	1.86571	6.95349	1.19e-11	9.02e-11	15.3727
RFC3	0.772894	2.48786	15.8984	6.49e-46	6.45e-44	93.5533
CCT5	0.768388	5.26241	13.7182	2.68e-36	1.72e-34	71.5383
KIF1A	0.767929	0.876085	5.83509	9.98e-09	5e-08	8.79588
STIL	0.764842	1.40895	17.0773	2.7e-51	3.32e-49	105.88
BRCA1	0.764511	1.444	15.4499	6.76e-44	6.07e-42	88.9324
RAC3	0.761024	3.05398	7.81593	3.56e-14	3.71e-13	21.0796
PARPBP	0.760465	1.17792	17.9412	2.71e-55	3.7e-53	115.044
PRTFDC1	0.75965	2.28951	11.9087	8.78e-29	3.87e-27	54.3536
CCNF	0.759008	1.95186	15.808	1.66e-45	1.58e-43	92.6184
ASCL1	0.758019	1.02805	3.88857	0.000115251	0.000305047	-0.199163
PLAU	0.757108	5.19675	5.43688	8.7e-08	3.8e-07	6.69348
CXCL9	0.754961	4.29506	4.66002	4.12e-06	1.38e-05	2.974
SKP2	0.75396	2.49729	11.6484	9.56e-28	3.93e-26	51.9843
CT83	0.753596	1.85973	4.22408	2.88e-05	8.42e-05	1.11566
XRCC2	0.75076	1.17715	15.2398	5.87e-43	5.05e-41	86.7819
BPIFA1	0.748622	4.20134	2.27565	0.0233129	0.0389544	-5.06518
FSCN1	0.748319	4.4839	6.48102	2.29e-10	1.46e-09	12.4766
GMNN	0.746488	2.98728	13.4159	5.22e-35	3.23e-33	68.5882
CENPK	0.745329	1.28864	15.1452	1.55e-42	1.29e-40	85.8172
PAICS	0.744304	4.11772	14.6617	2.14e-40	1.64e-38	80.9186
DUSP4	0.743754	3.15581	5.33373	1.49e-07	6.28e-07	6.17023
PITX1	0.741505	1.84946	6.53012	1.7e-10	1.11e-09	12.7697
TRIB3	0.737789	3.30788	9.65902	2.88e-20	5.81e-19	34.9224
B4GALNT4	0.737768	1.54849	6.51349	1.88e-10	1.21e-09	12.6702
RCOR2	0.737483	1.2388	9.48793	1.15e-19	2.21e-18	33.551
TUBG1	0.734954	4.21405	13.6418	5.69e-36	3.63e-34	70.7894
TUBB2B	0.734354	1.67191	5.04177	6.58e-07	2.51e-06	4.73757
RMI2	0.733236	2.61167	11.9398	6.59e-29	2.92e-27	54.6384
MIS18A	0.732911	3.03164	15.4249	8.75e-44	7.77e-42	88.6756
KIF20B	0.731747	1.58949	16.2518	1.62e-47	1.74e-45	97.2229
TFF1	0.731221	2.28162	2.7684	0.00585424	0.0111859	-3.83932
SNRPB	0.731078	6.93216	11.0815	1.57e-25	5.26e-24	46.9268
TMEM132A	0.726523	2.9387	8.40162	5.18e-16	6.63e-15	25.2471
HPDL	0.726112	0.913335	10.651	6.83e-24	1.96e-22	43.1859
GNPNAT1	0.725473	3.36948	12.536	2.49e-31	1.28e-29	60.1752
MAGEA12	0.724669	0.682013	5.53733	5.1e-08	2.31e-07	7.21154
KIF18A	0.724436	1.27645	17.6781	4.51e-54	6.02e-52	112.244
GINS4	0.724422	1.10323	14.7989	5.31e-41	4.17e-39	82.3021
CDKN2A	0.723618	1.91498	5.41569	9.73e-08	4.21e-07	6.58528
DSN1	0.718796	3.192	14.7487	8.85e-41	6.84e-39	81.7951
WDR76	0.718012	1.77597	15.6568	7.97e-45	7.47e-43	91.059
KNTC1	0.717954	1.77643	13.023	2.37e-33	1.36e-31	64.7982
HSPD1	0.717275	6.21509	14.2613	1.21e-38	8.74e-37	76.9066
PGAM5	0.715714	3.79873	15.0827	2.94e-42	2.41e-40	85.1801
KIF3C	0.714156	1.86202	10.088	8.31e-22	1.96e-20	38.432
BOP1	0.713675	3.9712	9.97875	2.07e-21	4.69e-20	37.5289
ADGRF4	0.712637	1.11588	7.9727	1.17e-14	1.29e-13	22.1727
RAN	0.710085	5.62094	14.8755	2.44e-41	1.92e-39	83.0775
TONSL	0.70757	1.98629	11.9354	6.86e-29	3.04e-27	54.5976
MEST	0.706232	3.89154	11.1503	8.5e-26	2.95e-24	47.5331
CHAF1A	0.703956	2.34497	15.1384	1.66e-42	1.38e-40	85.7474
RFC5	0.700954	2.67142	16.0658	1.13e-46	1.18e-44	95.2892
SNRPF	0.700603	3.75196	14.3529	4.82e-39	3.58e-37	77.8207
KNL1	0.698665	0.961575	17.4017	8.6e-53	1.1e-50	109.31
APOBEC3B	0.698451	2.01357	7.01572	7.95e-12	6.2e-11	15.7667
RANBP1	0.694451	3.78595	15.1563	1.38e-42	1.16e-40	85.9299
TCF19	0.693046	2.88997	11.3209	1.85e-26	6.85e-25	49.0451
MRPL12	0.693023	4.45673	9.3307	4.07e-19	7.37e-18	32.3053
TPI1	0.69174	7.57779	12.4706	4.62e-31	2.34e-29	59.5616
CSE1L	0.691394	4.63791	14.3078	7.58e-39	5.52e-37	77.3708
P3H4	0.690686	3.42059	9.38758	2.58e-19	4.79e-18	32.7543
IER5L	0.689804	2.53441	8.36713	6.69e-16	8.44e-15	24.9954
ADAMDEC1	0.688771	2.03597	6.07473	2.55e-09	1.4e-08	10.123
SLC16A3	0.686605	4.21838	7.82043	3.45e-14	3.6e-13	21.1108
ERCC6L	0.68643	0.979043	16.6177	3.47e-49	3.92e-47	101.047
JPT1	0.686166	5.41935	9.77947	1.08e-20	2.28e-19	35.8977
PAFAH1B3	0.681642	4.58005	8.59973	1.18e-16	1.62e-15	26.7074
KLK6	0.681352	0.978018	4.83461	1.81e-06	6.45e-06	3.76494
HES6	0.67972	2.87465	5.61159	3.42e-08	1.58e-07	7.59989
S100A8	0.679415	3.85112	4.40982	1.28e-05	3.98e-05	1.88694
RFC2	0.678993	3.91655	14.6681	2e-40	1.54e-38	80.9825
TESMIN	0.678424	0.804145	12.4006	8.94e-31	4.44e-29	58.9061
PIF1	0.677974	0.876926	15.958	3.49e-46	3.49e-44	94.1713
NDC1	0.67773	2.92543	14.3094	7.46e-39	5.46e-37	77.3863
IGFBP3	0.675964	5.73582	5.5011	6.19e-08	2.77e-07	7.02375
MRPL15	0.674603	5.36557	11.516	3.19e-27	1.25e-25	50.7902
SHMT2	0.673859	4.45843	10.7919	2e-24	6.07e-23	44.401
E2F2	0.673309	1.13148	14.7517	8.58e-41	6.66e-39	81.8262
PPP1R14B	0.672219	5.74759	10.1086	6.98e-22	1.67e-20	38.6035
G6PD	0.671089	5.00787	5.8246	1.06e-08	5.28e-08	8.73885
TUBB3	0.669485	1.3647	9.57085	5.9e-20	1.16e-18	34.2135
MASTL	0.668596	2.39028	15.1884	9.95e-43	8.39e-41	86.2576
TARS	0.668375	4.18456	12.571	1.79e-31	9.26e-30	60.5046
FANCG	0.667906	2.51844	14.9124	1.67e-41	1.34e-39	83.4515
CHEK2	0.667079	2.10715	12.4976	3.58e-31	1.82e-29	59.8148
CDH3	0.666627	3.69683	4.85708	1.62e-06	5.84e-06	3.86868
SMKR1	0.663496	1.68393	5.94839	5.27e-09	2.75e-08	9.41759
TRAIP	0.661901	1.35235	18.6904	8.59e-59	1.3e-56	123.061
SNRPD1	0.661054	3.32316	15.234	6.24e-43	5.34e-41	86.7225
AK4	0.660656	1.88533	7.24688	1.75e-12	1.48e-11	17.2545
DDX39A	0.660039	3.95272	13.0285	2.25e-33	1.3e-31	64.8509
SLC6A8	0.657882	2.79887	6.62559	9.43e-11	6.39e-10	13.3449
SLC16A14	0.656791	2.21264	4.73615	2.88e-06	9.96e-06	3.31567
CHAF1B	0.65547	1.78099	13.7836	1.41e-36	9.13e-35	72.1798
TUBB	0.655078	7.538	11.8639	1.33e-28	5.72e-27	53.9437
FKBP4	0.654641	4.40556	9.95135	2.6e-21	5.85e-20	37.3033
MUC13	0.653197	2.17369	3.05353	0.00238906	0.00496126	-3.0241
DNMT3B	0.653169	1.19231	11.0438	2.19e-25	7.25e-24	46.5962
PYCR1	0.652982	5.23203	7.5366	2.47e-13	2.31e-12	19.1736
PKP2	0.651244	1.45686	6.78636	3.45e-11	2.47e-10	14.3291
MEX3A	0.650711	2.22367	6.53213	1.68e-10	1.09e-09	12.7817
UNG	0.650024	3.99461	13.5635	1.23e-35	7.8e-34	70.025
BASP1	0.649994	4.80996	5.37325	1.22e-07	5.2e-07	6.36966
CDCA7	0.649393	2.60953	6.71962	5.25e-11	3.67e-10	13.9182
CBX2	0.648445	1.72843	7.43425	4.97e-13	4.5e-12	18.4889
POP7	0.648356	4.72595	11.3749	1.14e-26	4.31e-25	49.5262
VIL1	0.647017	1.23652	4.47706	9.49e-06	3.01e-05	2.17368
LRR1	0.646341	2.29495	14.213	1.96e-38	1.4e-36	76.4263
BLM	0.645824	1.17731	15.5296	2.97e-44	2.69e-42	89.7503
PAX9	0.64524	1.31543	6.95377	1.19e-11	9.01e-11	15.3745
GJB3	0.644699	1.75218	4.72774	3e-06	1.03e-05	3.27765
ZNF367	0.643694	1.37079	13.9505	2.69e-37	1.83e-35	73.8241
TOMM40	0.642927	4.13894	12.3772	1.11e-30	5.49e-29	58.6872
TMEM106C	0.642595	4.44592	10.1008	7.46e-22	1.78e-20	38.5381
LDHA	0.642218	6.95592	10.7443	3.04e-24	9.05e-23	43.9895
NUDT1	0.641876	2.93771	12.0751	1.88e-29	8.63e-28	55.8822
HELLS	0.640383	1.27152	12.8866	8.79e-33	4.93e-31	63.495
SEMA3A	0.640223	1.4313	6.66955	7.18e-11	4.93e-10	13.612
CCDC58	0.640137	3.08178	14.1618	3.27e-38	2.31e-36	75.9169
CYCS	0.637084	4.76302	11.6039	1.43e-27	5.84e-26	51.5825
MT2A	0.635917	6.07995	5.41325	9.86e-08	4.26e-07	6.57283
RAB5IF	0.633697	4.4392	10.5762	1.3e-23	3.64e-22	42.5454
HASPIN	0.633121	0.931776	16.5401	7.87e-49	8.81e-47	100.234
HIST1H2BJ	0.633019	1.37354	7.34891	8.83e-13	7.78e-12	17.9236
MLLT11	0.632792	1.79332	7.18589	2.61e-12	2.18e-11	16.8582
KRT80	0.631057	3.59697	6.18981	1.31e-09	7.47e-09	10.7765
HPRT1	0.63084	4.49205	11.1625	7.63e-26	2.67e-24	47.6405
CENPO	0.630727	1.71736	16.4364	2.34e-48	2.57e-46	99.1497
MDFI	0.629721	3.05315	6.17706	1.41e-09	8e-09	10.7036
TOPBP1	0.62803	2.87159	12.2386	4.09e-30	1.94e-28	57.3961
NMU	0.62798	1.93296	4.8356	1.8e-06	6.42e-06	3.76953
SELENOI	0.627143	2.84665	12.0007	3.75e-29	1.68e-27	55.1972
CCDC34	0.626726	2.02132	11.0121	2.9e-25	9.42e-24	46.3184
CPD	0.625213	4.50247	7.06221	5.88e-12	4.65e-11	16.0628
ASNS	0.623011	3.11357	8.85407	1.7e-17	2.58e-16	28.6183
COL1A1	0.62253	7.64806	4.40602	1.3e-05	4.04e-05	1.87086
PTHLH	0.621725	1.13028	6.51542	1.86e-10	1.2e-09	12.6817
PLIN2	0.621109	3.84484	7.20478	2.31e-12	1.94e-11	16.9807
CABYR	0.621006	1.57705	5.42735	9.15e-08	3.98e-07	6.64476
HHIPL2	0.619625	1.15946	5.05618	6.13e-07	2.35e-06	4.80657
TMPRSS11E	0.618677	1.72157	4.0233	6.68e-05	0.000183898	0.316653
DNA2	0.617529	1.42875	12.2051	5.6e-30	2.64e-28	57.0851
HSPE1	0.617168	5.41753	11.5231	2.99e-27	1.18e-25	50.8546
PPAT	0.616666	2.20642	12.6632	7.44e-32	3.93e-30	61.3748
MMP9	0.614558	4.53064	4.48449	9.18e-06	2.92e-05	2.20559
SPAG4	0.61338	2.81984	7.66268	1.04e-13	1.02e-12	20.0272
ACTL6A	0.613267	4.02302	12.8113	1.81e-32	9.87e-31	62.7785
BRIX1	0.61021	3.24149	11.8997	9.54e-29	4.19e-27	54.2712
MRPS35	0.609072	5.09353	11.4537	5.6e-27	2.16e-25	50.2309
FANCA	0.608976	1.35817	14.5268	8.36e-40	6.29e-38	79.5622
MCM3	0.608968	4.74816	11.1242	1.07e-25	3.66e-24	47.3029
DSG2	0.608847	4.80049	6.85763	2.2e-11	1.61e-10	14.7716
TICRR	0.607203	0.713602	17.6663	5.12e-54	6.78e-52	112.118
GPI	0.607099	5.29842	11.1769	6.71e-26	2.37e-24	47.7684
HIST1H2BH	0.605082	0.994028	6.19312	1.28e-09	7.35e-09	10.7955
PTGES	0.604507	4.04025	4.99422	8.32e-07	3.13e-06	4.51104
POLQ	0.604474	0.704358	15.8643	9.25e-46	9.08e-44	93.2009
WDR62	0.603823	1.12012	11.2696	2.93e-26	1.07e-24	48.5891
PLEK2	0.602667	3.36	6.84685	2.35e-11	1.71e-10	14.7044
SNRPG	0.601238	4.58776	10.8967	8e-25	2.49e-23	45.3106
CCT6A	0.601141	5.76013	10.9561	4.75e-25	1.52e-23	45.8281
CDA	0.600988	3.01887	3.66088	0.000279667	0.000692573	-1.03333
FANCD2	0.598376	1.50793	15.682	6.14e-45	5.79e-43	91.3182
XPOT	0.597892	3.89334	11.285	2.55e-26	9.39e-25	48.7257
FOXA1	0.597826	4.12779	5.91327	6.43e-09	3.31e-08	9.22379
C2CD4A	0.597798	1.88476	5.06025	6e-07	2.3e-06	4.8261
CALU	0.596481	5.86655	9.47654	1.26e-19	2.41e-18	33.4603
RHPN2	0.595391	2.88101	7.17557	2.8e-12	2.32e-11	16.7914
ANP32E	0.595261	4.93947	7.52139	2.75e-13	2.55e-12	19.0714
BRI3BP	0.594913	2.47912	12.143	9.99e-30	4.63e-28	56.51
CDH24	0.594195	2.05256	8.41038	4.85e-16	6.23e-15	25.3111
POSTN	0.593066	5.17991	4.99664	8.22e-07	3.09e-06	4.52254
ZWILCH	0.593011	2.07075	14.7816	6.33e-41	4.94e-39	82.1279
PTPRH	0.592719	1.77756	5.48345	6.8e-08	3.02e-07	6.93262
SINHCAF	0.592639	3.69438	9.06583	3.29e-18	5.41e-17	30.2396
DONSON	0.59188	2.38309	12.315	2e-30	9.74e-29	58.1066
CRABP1	0.590681	0.862322	5.33829	1.46e-07	6.15e-07	6.19315
ECE2	0.588068	1.4973	12.2545	3.53e-30	1.68e-28	57.5439
CTPS1	0.58804	2.84702	10.9847	3.69e-25	1.19e-23	46.0779
CCT2	0.586254	5.04404	8.91783	1.04e-17	1.6e-16	29.1037
Downregulated genes
SULT1C2	-0.585601	1.41822	-6.21642	1.12e-09	6.45e-09	10.9291
UBTD1	-0.585624	4.12776	-8.33294	8.6e-16	1.07e-14	24.7467
ID4	-0.585747	2.69804	-5.76117	1.51e-08	7.36e-08	8.3958
SYNPO	-0.585948	3.51153	-8.34368	7.95e-16	9.94e-15	24.8248
HSPB8	-0.586907	3.13087	-6.44895	2.78e-10	1.75e-09	12.2862
BICDL2	-0.58835	2.71595	-7.63593	1.25e-13	1.21e-12	19.8452
ARHGAP44	-0.589238	1.67134	-9.57293	5.8e-20	1.14e-18	34.2302
TSPAN4	-0.590819	3.39633	-8.51305	2.26e-16	3.01e-15	26.0654
CR2	-0.591803	1.37109	-5.84228	9.59e-09	4.81e-08	8.83503
MMRN1	-0.592112	1.21548	-9.01123	5.04e-18	8.09e-17	29.819
CYS1	-0.593165	1.30363	-6.88014	1.9e-11	1.41e-10	14.9121
SYNE1	-0.594602	1.53201	-10.0575	1.07e-21	2.51e-20	38.1796
CD52	-0.595091	5.08461	-5.52409	5.47e-08	2.46e-07	7.1428
PID1	-0.595351	2.20694	-6.92727	1.41e-11	1.06e-10	15.2077
NATD1	-0.595539	2.0155	-11.9271	7.4e-29	3.27e-27	54.5224
SNTN	-0.59945	0.713251	-8.30727	1.04e-15	1.28e-14	24.5605
LGI3	-0.599752	0.644931	-7.42594	5.25e-13	4.74e-12	18.4336
HLA-DQA1	-0.601392	4.92959	-5.02204	7.26e-07	2.75e-06	4.64332
ITM2A	-0.602708	3.07445	-7.29634	1.26e-12	1.08e-11	17.5779
SELP	-0.602791	1.51516	-9.40204	2.3e-19	4.28e-18	32.8688
ZBTB4	-0.603544	4.20692	-13.2838	1.89e-34	1.16e-32	67.3076
MT-ND6	-0.603934	10.2888	-5.25709	2.22e-07	9.1e-07	5.78721
C11orf96	-0.604544	3.42274	-6.35534	4.89e-10	2.98e-09	11.7348
DLX3	-0.604958	1.10075	-8.00791	9.12e-15	1.01e-13	22.4205
GPIHBP1	-0.605298	1.12405	-7.70729	7.62e-14	7.61e-13	20.3319
CLEC14A	-0.606133	3.36236	-8.80137	2.55e-17	3.8e-16	28.219
EFEMP1	-0.608211	4.50342	-6.35611	4.87e-10	2.96e-09	11.7393
LAMP5	-0.610444	1.75074	-7.6144	1.45e-13	1.39e-12	19.6991
AHNAK	-0.611255	4.73205	-6.2381	9.83e-10	5.73e-09	11.0539
PHACTR1	-0.611303	1.12939	-12.407	8.42e-31	4.2e-29	58.9658
CD55	-0.612137	6.34992	-5.82241	1.07e-08	5.34e-08	8.72691
EMB	-0.613579	4.0287	-6.30707	6.53e-10	3.9e-09	11.4531
PTN	-0.616623	2.11254	-5.38206	1.16e-07	4.97e-07	6.41431
HLA-DQA2	-0.617099	4.42225	-3.65711	0.000283694	0.000701919	-1.04673
AADAC	-0.618602	1.07675	-5.71449	1.95e-08	9.35e-08	8.1455
CAPN9	-0.61867	1.60416	-5.2633	2.15e-07	8.83e-07	5.81805
SDR16C5	-0.619267	3.81154	-5.26379	2.14e-07	8.81e-07	5.82049
ANKRD29	-0.621485	1.57697	-6.97234	1.05e-11	8.06e-11	15.4918
PDK4	-0.621804	2.96477	-5.47104	7.26e-08	3.21e-07	6.86873
ETV1	-0.6224	2.12925	-7.85516	2.7e-14	2.87e-13	21.3516
LTBP4	-0.622642	3.49267	-7.76	5.27e-14	5.39e-13	20.6936
VAMP2	-0.623279	4.18454	-13.5059	2.16e-35	1.35e-33	69.4633
GRAMD2A	-0.623935	2.12239	-7.36278	8.04e-13	7.13e-12	18.0151
C9orf135	-0.624693	0.968589	-6.0103	3.7e-09	1.97e-08	9.76165
DCN	-0.626022	4.64113	-6.14216	1.73e-09	9.67e-09	10.5047
KIF12	-0.626097	1.98198	-5.5152	5.74e-08	2.58e-07	7.09671
ESAM	-0.62619	3.83265	-7.71201	7.37e-14	7.39e-13	20.3642
SCNN1G	-0.626255	1.96029	-5.82184	1.07e-08	5.35e-08	8.72385
LRRC36	-0.626555	0.709423	-9.48333	1.2e-19	2.28e-18	33.5143
SPRY4	-0.627171	3.29848	-8.55644	1.63e-16	2.21e-15	26.3862
DEPTOR	-0.628385	3.34355	-7.399	6.3e-13	5.65e-12	18.2548
EFCC1	-0.628544	1.1949	-12.3772	1.11e-30	5.49e-29	58.6877
DAPK1	-0.62972	3.30315	-8.04995	6.75e-15	7.6e-14	22.7174
CXCL16	-0.630715	5.55918	-9.34681	3.58e-19	6.52e-18	32.4323
CTSG	-0.631178	0.801489	-10.1526	4.83e-22	1.17e-20	38.969
MUC15	-0.631202	2.14206	-4.84179	1.75e-06	6.25e-06	3.79806
GATA6	-0.631972	1.94194	-7.95392	1.34e-14	1.46e-13	22.0409
MARCO	-0.633413	3.98637	-4.00286	7.26e-05	0.00019908	0.237338
ALDH3B1	-0.634593	3.94285	-6.15925	1.56e-09	8.82e-09	10.6019
SLC39A8	-0.636828	3.98129	-7.50567	3.06e-13	2.83e-12	18.9659
FBP1	-0.637896	5.71032	-7.16323	3.04e-12	2.51e-11	16.7117
RTN4RL1	-0.638293	0.949353	-9.30356	5.05e-19	9.05e-18	32.0918
LY86	-0.639344	2.89495	-7.51975	2.78e-13	2.58e-12	19.0604
BEX4	-0.640917	4.23534	-7.65249	1.11e-13	1.09e-12	19.9578
MS4A2	-0.642518	0.896586	-11.259	3.22e-26	1.17e-24	48.4946
CIT	-0.643307	2.88182	-5.00055	8.07e-07	3.03e-06	4.54108
NINJ2	-0.643658	3.03085	-7.4205	5.45e-13	4.9e-12	18.3975
PDZD2	-0.643802	1.22061	-10.3438	9.56e-23	2.48e-21	40.5721
CAPSL	-0.644641	0.947474	-6.39097	3.95e-10	2.44e-09	11.9438
IL6ST	-0.647424	4.52524	-9.88664	4.44e-21	9.75e-20	36.7722
GAS6	-0.647876	3.91391	-7.94003	1.48e-14	1.61e-13	21.9435
UNC13B	-0.648104	4.09184	-7.62967	1.3e-13	1.26e-12	19.8027
ABCA8	-0.648704	0.719777	-13.2095	3.9e-34	2.35e-32	66.5908
NR4A1	-0.651216	3.51393	-5.22869	2.57e-07	1.04e-06	5.64652
MCEMP1	-0.651297	1.92079	-5.45871	7.75e-08	3.41e-07	6.80538
GPX3	-0.651467	5.60461	-6.45341	2.71e-10	1.71e-09	12.3126
ARSE	-0.655048	2.78022	-4.51795	7.9e-06	2.55e-05	2.34999
HBA2	-0.65551	2.46955	-5.02559	7.13e-07	2.7e-06	4.66028
C1QTNF7	-0.656481	0.649483	-15.311	2.83e-43	2.46e-41	87.5096
CCDC69	-0.65705	3.18796	-9.16837	1.47e-18	2.52e-17	31.0345
TBX2	-0.657677	2.2329	-10.02	1.47e-21	3.39e-20	37.8693
GNG7	-0.657819	1.43531	-12.8952	8.1e-33	4.55e-31	63.5769
ZBTB16	-0.658394	0.682684	-10.15	4.93e-22	1.2e-20	38.9473
SOSTDC1	-0.660065	0.698265	-8.29376	1.15e-15	1.41e-14	24.4626
PRX	-0.660072	1.48111	-10.7401	3.15e-24	9.37e-23	43.9531
COL4A4	-0.660927	1.85468	-8.29949	1.1e-15	1.35e-14	24.5041
FAM183A	-0.661265	1.6493	-6.02273	3.45e-09	1.85e-08	9.83114
SLC47A1	-0.662304	1.52927	-7.71744	7.1e-14	7.12e-13	20.4014
ARHGAP31	-0.66533	2.20054	-10.3838	6.8e-23	1.79e-21	40.9099
TMEM190	-0.666485	1.13934	-5.68245	2.32e-08	1.1e-07	7.97468
PER1	-0.667088	3.7201	-7.32934	1.01e-12	8.81e-12	17.7947
AKAP13	-0.668138	3.28039	-11.0345	2.38e-25	7.81e-24	46.5144
SNX25	-0.669202	2.9421	-9.7126	1.86e-20	3.83e-19	35.3552
RAMP3	-0.671065	3.12631	-8.56647	1.51e-16	2.06e-15	26.4605
TGFBR2	-0.672776	5.14114	-9.78716	1.01e-20	2.14e-19	35.9602
ICAM5	-0.675428	1.53416	-7.84892	2.82e-14	2.98e-13	21.3082
SPON1	-0.675832	3.07668	-6.9167	1.51e-11	1.13e-10	15.1413
CST2	-0.676151	1.61129	-6.25174	9.07e-10	5.31e-09	11.1326
ANGPT1	-0.678311	1.22135	-11.0628	1.85e-25	6.18e-24	46.7628
LMOD1	-0.678355	2.22533	-9.18952	1.25e-18	2.14e-17	31.1992
RGS5	-0.678728	3.67149	-8.31811	9.6e-16	1.19e-14	24.6391
C1orf21	-0.678804	2.0952	-10.1775	3.91e-22	9.57e-21	39.1767
RSPH1	-0.67899	1.46232	-7.30506	1.18e-12	1.02e-11	17.6352
CAT	-0.679606	4.74572	-11.1243	1.07e-25	3.66e-24	47.3042
FGFR2	-0.679894	1.84938	-8.71352	4.98e-17	7.18e-16	27.5573
LAMA2	-0.680068	1.85024	-10.3407	9.82e-23	2.54e-21	40.5462
GDF10	-0.680199	0.935382	-9.2793	6.12e-19	1.09e-17	31.9012
EPHX2	-0.680567	1.89239	-11.1066	1.25e-25	4.23e-24	47.1477
S100B	-0.681351	2.42284	-5.7514	1.59e-08	7.73e-08	8.34328
CTSO	-0.682332	4.12613	-11.2156	4.75e-26	1.7e-24	48.11
PRDM16	-0.682535	1.15872	-9.11262	2.28e-18	3.83e-17	30.6016
HSPB6	-0.682925	2.01318	-7.59323	1.68e-13	1.6e-12	19.5557
FABP4	-0.686347	1.48661	-6.36872	4.52e-10	2.76e-09	11.8132
TMEM243	-0.688867	3.23362	-10.4523	3.78e-23	1.02e-21	41.4902
ITIH5	-0.689566	1.00955	-11.3288	1.72e-26	6.41e-25	49.1159
RETN	-0.691829	1.57207	-6.03699	3.17e-09	1.71e-08	9.91094
FOXF2	-0.692446	1.91881	-9.59609	4.81e-20	9.49e-19	34.416
NR0B2	-0.692613	1.44722	-5.11356	4.6e-07	1.79e-06	5.08313
NRGN	-0.692937	3.76116	-5.01265	7.6e-07	2.87e-06	4.59862
FCGRT	-0.693397	5.33358	-10.9278	6.09e-25	1.92e-23	45.581
BTNL9	-0.699024	0.893483	-11.4468	5.96e-27	2.3e-25	50.1697
CABCOCO1	-0.699122	0.937788	-9.38094	2.72e-19	5.03e-18	32.7018
MTURN	-0.699303	2.62907	-9.76786	1.18e-20	2.5e-19	35.8034
AK1	-0.69937	2.78952	-9.41742	2.03e-19	3.81e-18	32.9906
SCN4B	-0.700416	0.948361	-14.4848	1.28e-39	9.56e-38	79.1411
ST6GALNAC1	-0.700442	3.82999	-4.98233	8.82e-07	3.3e-06	4.45472
EMP2	-0.700988	4.64178	-9.14424	1.78e-18	3.02e-17	30.8468
SHROOM4	-0.701397	1.61694	-11.6121	1.33e-27	5.44e-26	51.6563
CA3	-0.708676	0.99446	-10.8783	9.41e-25	2.92e-23	45.1506
NPR1	-0.709716	1.63106	-9.9563	2.49e-21	5.63e-20	37.344
NDRG2	-0.710691	2.48035	-9.64517	3.23e-20	6.47e-19	34.8108
SLC1A7	-0.713055	1.49642	-4.56374	6.41e-06	2.09e-05	2.54919
SOD3	-0.713888	3.98222	-7.29387	1.28e-12	1.1e-11	17.5617
CFD	-0.715575	3.86501	-6.20101	1.22e-09	7.03e-09	10.8407
2022-03-02	-0.715612	2.78162	-11.0486	2.1e-25	6.97e-24	46.6376
ZFP36	-0.717128	6.60593	-7.15896	3.12e-12	2.57e-11	16.6841
SGCA	-0.718364	1.2754	-11.4837	4.27e-27	1.66e-25	50.5005
SLC46A2	-0.720349	1.21049	-7.61959	1.4e-13	1.34e-12	19.7343
ESYT3	-0.721947	1.3926	-10.6913	4.82e-24	1.41e-22	43.532
ATP8A1	-0.722182	2.32438	-8.68637	6.12e-17	8.73e-16	27.3538
CPQ	-0.725096	3.25013	-11.2171	4.69e-26	1.68e-24	48.1233
CYP27A1	-0.727637	4.23311	-7.62017	1.39e-13	1.34e-12	19.7382
HP	-0.728873	2.21728	-4.10174	4.83e-05	0.000136347	0.624485
C9orf24	-0.729211	1.15413	-6.7152	5.4e-11	3.77e-10	13.891
EGR1	-0.729474	5.71947	-6.43273	3.07e-10	1.92e-09	12.1901
CACHD1	-0.729678	1.88082	-8.17427	2.75e-15	3.24e-14	23.6024
CGNL1	-0.730214	2.24721	-10.8512	1.19e-24	3.68e-23	44.9143
HIGD1B	-0.730998	1.82881	-10.4815	2.95e-23	8.03e-22	41.7375
SUSD4	-0.732591	1.84207	-7.95278	1.35e-14	1.48e-13	22.0329
PLXNA2	-0.732802	2.43997	-9.64874	3.13e-20	6.29e-19	34.8395
PHYHD1	-0.734091	2.45294	-6.77636	3.67e-11	2.62e-10	14.2673
SEC14L6	-0.734646	1.28517	-9.3557	3.33e-19	6.09e-18	32.5025
LAMP3	-0.739172	4.245	-5.87666	7.9e-09	4.03e-08	9.02279
CH25H	-0.740664	2.46448	-6.41189	3.48e-10	2.17e-09	12.0671
PIK3IP1	-0.741936	3.84804	-12.6492	8.5e-32	4.47e-30	61.2427
TNXB	-0.742221	1.07905	-11.3577	1.33e-26	4.99e-25	49.3731
CAPS	-0.743509	3.08903	-6.89993	1.68e-11	1.25e-10	15.0361
RASGRF1	-0.744458	1.07007	-9.10907	2.35e-18	3.93e-17	30.5741
CX3CL1	-0.747028	3.55033	-5.80484	1.18e-08	5.85e-08	8.63161
MECOM	-0.748217	2.82354	-8.29964	1.1e-15	1.35e-14	24.5052
SLC7A8	-0.748378	2.85962	-7.65362	1.11e-13	1.08e-12	19.9656
MRC1	-0.750202	3.60258	-6.05138	2.92e-09	1.58e-08	9.99167
EMCN	-0.750699	1.60546	-12.3346	1.66e-30	8.14e-29	58.2895
CYB5A	-0.751424	3.95188	-8.76163	3.45e-17	5.06e-16	27.9192
CX3CR1	-0.753039	1.07459	-12.2538	3.55e-30	1.69e-28	57.5369
ABI3BP	-0.753132	1.6261	-10.2102	2.97e-22	7.35e-21	39.4499
SCARA3	-0.753396	2.27145	-9.01796	4.78e-18	7.72e-17	29.8708
RPS6KA2	-0.753646	3.83596	-10.4454	4.02e-23	1.08e-21	41.4309
TNS2	-0.754596	3.28574	-11.8059	2.26e-28	9.64e-27	53.414
SERPINA1	-0.754915	6.8114	-4.65656	4.18e-06	1.4e-05	2.95861
OGN	-0.755012	1.11058	-9.2795	6.11e-19	1.09e-17	31.9028
TCF21	-0.755878	1.06817	-12.1058	1.41e-29	6.51e-28	56.1663
PLAC9	-0.758158	1.9354	-12.9676	4.04e-33	2.29e-31	64.2683
SLIT3	-0.759473	1.44976	-10.7113	4.05e-24	1.2e-22	43.7048
FAM107A	-0.761253	1.33678	-9.75205	1.35e-20	2.82e-19	35.675
TSPAN7	-0.764284	2.49792	-6.29602	6.98e-10	4.14e-09	11.3889
FAM216B	-0.765573	0.915909	-7.81666	3.54e-14	3.7e-13	21.0847
IL6R	-0.765655	3.14916	-10.8405	1.31e-24	4.01e-23	44.8222
TEF	-0.766769	2.68128	-12.4599	5.11e-31	2.58e-29	59.4613
CELF2	-0.770383	2.96108	-10.6175	9.13e-24	2.59e-22	42.8983
ABCC3	-0.771786	4.40646	-6.86325	2.12e-11	1.56e-10	14.8067
KLF2	-0.773135	3.45249	-9.10664	2.39e-18	4e-17	30.5552
MUCL3	-0.774633	1.00496	-5.83885	9.77e-09	4.9e-08	8.81632
LTF	-0.775256	3.53467	-4.15369	3.88e-05	0.000111243	0.831429
COL4A3	-0.775708	1.58855	-8.67224	6.81e-17	9.67e-16	27.2481
ALDH2	-0.776259	4.40117	-10.254	2.05e-22	5.16e-21	39.8172
DRAM1	-0.778181	4.79732	-8.21571	2.03e-15	2.44e-14	23.8997
P3H2	-0.778911	2.16453	-6.86446	2.1e-11	1.55e-10	14.8142
CBX7	-0.779316	2.08131	-15.4752	5.21e-44	4.7e-42	89.1912
COLEC12	-0.781697	2.47536	-8.58969	1.27e-16	1.74e-15	26.6328
FDCSP	-0.782922	2.18167	-5.2311	2.54e-07	1.03e-06	5.65843
RAI2	-0.782934	2.10653	-12.8992	7.79e-33	4.39e-31	63.6156
SPINK1	-0.78316	4.29976	-2.86793	0.00431609	0.0084878	-3.5635
GPC3	-0.784948	2.93325	-6.29322	7.09e-10	4.21e-09	11.3727
HLA-DRA	-0.785519	9.83243	-7.01904	7.78e-12	6.07e-11	15.7877
KCNK5	-0.787592	3.81809	-7.48011	3.64e-13	3.34e-12	18.7948
VEPH1	-0.788352	1.37508	-9.67315	2.57e-20	5.21e-19	35.0364
CITED2	-0.788978	5.34367	-9.28129	6.03e-19	1.07e-17	31.9169
BMP3	-0.789876	1.96906	-6.46452	2.53e-10	1.6e-09	12.3785
MFSD2A	-0.790562	3.25894	-8.10372	4.58e-15	5.25e-14	23.0989
RRAD	-0.79061	3.3788	-5.92306	6.08e-09	3.15e-08	9.2777
HPGDS	-0.790994	1.40367	-11.2074	5.11e-26	1.82e-24	48.038
PXMP4	-0.793261	2.79859	-10.1658	4.32e-22	1.05e-20	39.0792
EDNRB	-0.79676	1.82473	-10.9415	5.4e-25	1.72e-23	45.7007
VIPR1	-0.796958	1.48261	-12.4429	6e-31	3.01e-29	59.3021
TMEM37	-0.797072	2.99528	-8.76247	3.43e-17	5.03e-16	27.9255
MACROD2	-0.797095	1.12384	-9.62069	3.94e-20	7.84e-19	34.6137
C5orf49	-0.797197	1.29528	-8.86673	1.54e-17	2.35e-16	28.7145
ECRG4	-0.799342	0.83082	-10.7482	2.94e-24	8.77e-23	44.0226
TNNC1	-0.801832	2.27831	-7.41163	5.79e-13	5.2e-12	18.3385
VWF	-0.803557	4.02279	-8.42315	4.42e-16	5.71e-15	25.4045
CRY2	-0.805837	3.02469	-16.8552	2.84e-50	3.38e-48	103.54
CD302	-0.807043	2.12714	-12.1661	8.06e-30	3.77e-28	56.7237
RFTN1	-0.807742	3.79572	-10.6325	8.02e-24	2.29e-22	43.0276
AHCYL2	-0.810848	4.21549	-7.07273	5.49e-12	4.37e-11	16.13
ADGRD1	-0.812276	1.53741	-10.0793	8.93e-22	2.1e-20	38.36
IL37	-0.814141	1.6769	-4.47688	9.5e-06	3.02e-05	2.1729
BNIPL	-0.814382	1.95024	-7.43909	4.81e-13	4.36e-12	18.5211
FAM189A2	-0.814389	1.74476	-10.3905	6.42e-23	1.7e-21	40.9663
NPNT	-0.819947	3.28314	-7.29724	1.25e-12	1.08e-11	17.5838
STEAP4	-0.82015	3.7285	-6.44591	2.84e-10	1.78e-09	12.2682
SLC40A1	-0.822584	5.19603	-8.39477	5.45e-16	6.96e-15	25.197
RGCC	-0.823869	5.25647	-11.1691	7.19e-26	2.53e-24	47.6993
CD74	-0.824421	9.88588	-7.74897	5.7e-14	5.79e-13	20.6178
HLA-DPA1	-0.825337	6.16945	-7.35219	8.64e-13	7.63e-12	17.9453
TXNIP	-0.827106	7.40243	-9.7326	1.58e-20	3.27e-19	35.5172
GPD1L	-0.827235	3.75084	-11.8951	9.95e-29	4.36e-27	54.2293
DUSP1	-0.831259	6.86039	-7.51097	2.95e-13	2.73e-12	19.0015
FBLN5	-0.832945	3.12654	-10.5962	1.1e-23	3.09e-22	42.716
HLA-DOA	-0.833674	3.79549	-7.77867	4.63e-14	4.77e-13	20.8222
GDF15	-0.834981	4.70861	-5.8279	1.04e-08	5.19e-08	8.75675
ITGA8	-0.835496	1.53005	-13.329	1.22e-34	7.48e-33	67.7452
FLRT3	-0.835665	2.84032	-7.95459	1.34e-14	1.46e-13	22.0456
CCL19	-0.839801	4.16353	-5.37811	1.19e-07	5.07e-07	6.39426
CPB2	-0.839975	1.17226	-6.84826	2.33e-11	1.7e-10	14.7132
PRSS12	-0.843795	1.40111	-8.7728	3.17e-17	4.67e-16	28.0033
PLLP	-0.844528	1.96969	-12.0324	2.79e-29	1.27e-27	55.4893
HLA-DQB1	-0.847548	5.62119	-6.7286	4.96e-11	3.48e-10	13.9733
DAAM2	-0.848081	1.96569	-10.5635	1.46e-23	4.05e-22	42.4367
NR3C2	-0.849219	1.68018	-13.8594	6.64e-37	4.35e-35	72.925
NEDD9	-0.849383	3.61766	-9.98642	1.94e-21	4.41e-20	37.5921
CHI3L2	-0.850418	2.14911	-7.86532	2.52e-14	2.67e-13	21.4222
FMO2	-0.851515	2.30787	-9.75662	1.3e-20	2.72e-19	35.7121
TPPP	-0.854638	1.83728	-10.2	3.24e-22	7.98e-21	39.3648
ADAMTS8	-0.85497	0.869681	-14.1395	4.09e-38	2.88e-36	75.6959
DPYSL2	-0.85588	4.33574	-11.9816	4.48e-29	2e-27	55.0217
TBX4	-0.857313	1.61585	-13.2304	3.18e-34	1.92e-32	66.7919
KCNQ1	-0.862732	3.15858	-8.15046	3.27e-15	3.82e-14	23.4321
PRELP	-0.865411	3.55308	-8.49602	2.57e-16	3.38e-15	25.9398
PLA2G4F	-0.870076	1.42939	-10.9509	4.97e-25	1.59e-23	45.7829
CEBPA	-0.873258	2.95524	-9.06217	3.39e-18	5.55e-17	30.2114
CES1	-0.874184	3.89781	-5.16568	3.54e-07	1.4e-06	5.33677
KLF15	-0.874539	1.61071	-10.5646	1.44e-23	4.02e-22	42.4461
MS4A8	-0.883831	1.21719	-7.23859	1.84e-12	1.56e-11	17.2005
CLIC3	-0.885665	3.47255	-7.13044	3.76e-12	3.07e-11	16.5002
GLB1L3	-0.888972	1.07696	-7.60751	1.52e-13	1.45e-12	19.6524
HLA-DMA	-0.890899	5.82184	-9.73074	1.6e-20	3.31e-19	35.5022
METTL7A	-0.894886	4.0326	-11.2246	4.38e-26	1.58e-24	48.1904
HBB	-0.895277	3.9431	-5.45551	7.89e-08	3.46e-07	6.78893
TMEM100	-0.897141	1.4267	-9.66923	2.65e-20	5.37e-19	35.0048
ERN2	-0.902256	1.55349	-6.31623	6.18e-10	3.7e-09	11.5065
ATOH8	-0.903031	2.04309	-7.88432	2.2e-14	2.35e-13	21.5544
MGLL	-0.904223	4.18619	-11.1141	1.17e-25	4e-24	47.2138
ITGA9	-0.905734	2.2493	-12.7234	4.19e-32	2.26e-30	61.9444
FGFR3	-0.90587	2.5069	-7.31363	1.12e-12	9.71e-12	17.6914
RCAN2	-0.905996	2.47134	-10.3862	6.67e-23	1.76e-21	40.9296
MAOB	-0.907217	2.5994	-10.2387	2.33e-22	5.84e-21	39.6883
TLR2	-0.908139	3.32961	-10.1504	4.92e-22	1.19e-20	38.9509
TMEM125	-0.908484	5.23712	-10.499	2.54e-23	6.95e-22	41.8869
PRG4	-0.909826	0.989825	-11.1123	1.19e-25	4.05e-24	47.1977
HLA-DRB1	-0.909934	8.9564	-7.85165	2.77e-14	2.93e-13	21.3272
HLA-DPB1	-0.910543	6.93105	-8.66644	7.12e-17	1.01e-15	27.2047
SHE	-0.912709	1.83879	-9.93923	2.87e-21	6.42e-20	37.2037
TSC22D3	-0.919079	5.2762	-10.5545	1.57e-23	4.36e-22	42.36
SNX30	-0.926602	2.66082	-12.626	1.06e-31	5.55e-30	61.0235
TNS1	-0.92719	3.87527	-12.3098	2.1e-30	1.02e-28	58.0584
LTBP2	-0.932937	4.42598	-10.2894	1.52e-22	3.88e-21	40.1136
HABP2	-0.9374	2.14931	-6.43169	3.09e-10	1.93e-09	12.184
TPSAB1	-0.9386	2.96203	-8.34104	8.11e-16	1.01e-14	24.8056
PIFO	-0.941403	1.90025	-10.3533	8.82e-23	2.29e-21	40.6521
MAOA	-0.941606	4.20535	-8.52903	2e-16	2.69e-15	26.1834
C5orf38	-0.943373	1.90573	-8.32637	9.03e-16	1.12e-14	24.699
KCNJ15	-0.944535	2.13365	-8.19419	2.38e-15	2.83e-14	23.7451
AOC3	-0.945463	3.34542	-10.5782	1.28e-23	3.58e-22	42.5625
SELENOP	-0.947316	3.87004	-10.095	7.83e-22	1.87e-20	38.4902
SLC15A2	-0.94781	2.1138	-11.7931	2.54e-28	1.08e-26	53.2977
CLIC5	-0.949198	1.79215	-9.82885	7.16e-21	1.54e-19	36.2999
SPARCL1	-0.949515	5.31704	-11.4073	8.5e-27	3.25e-25	49.8163
FOXQ1	-0.952918	3.03946	-6.53964	1.6e-10	1.05e-09	12.8268
MFSD4A	-0.958975	2.6424	-7.17545	2.8e-12	2.32e-11	16.7907
CD1A	-0.962791	1.67613	-7.73938	6.09e-14	6.15e-13	20.5519
PTPN13	-0.965739	2.62024	-9.07552	3.05e-18	5.04e-17	30.3145
CLIC6	-0.96578	4.61144	-6.06916	2.64e-09	1.44e-08	10.0916
APOH	-0.968555	1.65578	-7.03496	7.02e-12	5.5e-11	15.889
CLEC3B	-0.968737	2.67852	-9.43285	1.8e-19	3.38e-18	33.113
DUOXA1	-0.971393	1.87984	-10.6215	8.82e-24	2.5e-22	42.9329
FOS	-0.971973	6.147	-8.37529	6.29e-16	7.97e-15	25.0549
BTG2	-0.974307	5.5259	-10.4461	3.99e-23	1.08e-21	41.437
ZNF385B	-0.978624	1.36771	-9.2735	6.41e-19	1.13e-17	31.8558
SPATA18	-0.978809	1.43674	-12.1029	1.45e-29	6.68e-28	56.1394
HAS3	-0.997391	2.49001	-8.14761	3.33e-15	3.89e-14	23.4118
C3	-1.00062	6.53368	-7.61791	1.42e-13	1.36e-12	19.7229
CRTAC1	-1.00287	2.3752	-7.62902	1.31e-13	1.27e-12	19.7983
CYP4X1	-1.00733	2.23713	-9.39585	2.42e-19	4.49e-18	32.8198
MYH11	-1.00833	2.42895	-10.2427	2.26e-22	5.67e-21	39.7218
TPSB2	-1.00896	2.90015	-8.24136	1.69e-15	2.03e-14	24.0842
CEACAM6	-1.01763	8.33947	-5.52042	5.58e-08	2.51e-07	7.12376
RHOBTB2	-1.01777	3.85925	-10.8189	1.58e-24	4.83e-23	44.6344
CPAMD8	-1.02338	1.61265	-11.6867	6.74e-28	2.81e-26	52.3311
LPL	-1.02495	2.94844	-7.69353	8.38e-14	8.33e-13	20.2378
CD1C	-1.03478	1.8899	-11.0837	1.54e-25	5.16e-24	46.9465
B3GNT8	-1.04207	3.08909	-10.033	1.32e-21	3.05e-20	37.9766
HLA-DRB5	-1.04672	7.28856	-7.43395	4.98e-13	4.5e-12	18.4869
MUC21	-1.05503	3.12969	-5.44333	8.41e-08	3.68e-07	6.72651
SCN7A	-1.05597	1.35765	-16.0322	1.61e-46	1.65e-44	94.9402
FHL1	-1.05703	2.34188	-12.1481	9.53e-30	4.43e-28	56.5566
DUOX1	-1.06875	2.05164	-10.7997	1.87e-24	5.69e-23	44.4685
WFDC2	-1.06961	7.52579	-7.54276	2.37e-13	2.22e-12	19.2151
A2M	-1.07433	7.09929	-11.5297	2.81e-27	1.12e-25	50.9135
FCGBP	-1.08266	2.16235	-8.99677	5.64e-18	8.99e-17	29.7079
DES	-1.08528	1.92167	-10.5478	1.67e-23	4.61e-22	42.3025
DLC1	-1.08978	2.73039	-12.7856	2.31e-32	1.26e-30	62.5347
IL33	-1.09196	2.72041	-11.3211	1.85e-26	6.85e-25	49.0465
CAVIN2	-1.09718	3.34898	-11.3357	1.62e-26	6.04e-25	49.177
CHIA	-1.10049	1.15429	-9.71674	1.8e-20	3.71e-19	35.3888
AC007906.2	-1.10752	1.83283	-8.38436	5.89e-16	7.5e-15	25.1211
ACKR1	-1.11257	2.33343	-10.6138	9.43e-24	2.66e-22	42.8668
TPPP3	-1.11297	3.37883	-8.7066	5.25e-17	7.55e-16	27.5054
MMP28	-1.1153	2.4875	-7.90253	1.93e-14	2.08e-13	21.6814
FOSB	-1.11731	2.88548	-6.79513	3.26e-11	2.34e-10	14.3833
MAMDC2	-1.13747	1.55441	-14.6336	2.84e-40	2.17e-38	80.6356
CAPN8	-1.15281	3.70634	-8.67862	6.49e-17	9.23e-16	27.2958
AQP1	-1.15303	5.92754	-7.4483	4.52e-13	4.1e-12	18.5824
CYBRD1	-1.15363	4.42334	-13.5123	2.03e-35	1.27e-33	69.5256
VEGFD	-1.1601	1.23938	-13.2776	2.01e-34	1.23e-32	67.2478
IRX2	-1.16974	2.61549	-7.97761	1.13e-14	1.25e-13	22.2072
C20orf85	-1.17691	1.85781	-7.02357	7.56e-12	5.9e-11	15.8165
ABCA3	-1.17954	4.37956	-8.57189	1.45e-16	1.98e-15	26.5006
CPA3	-1.18198	3.24773	-9.63698	3.45e-20	6.91e-19	34.7448
PTGDS	-1.18594	4.31992	-9.71156	1.88e-20	3.86e-19	35.3468
HPGD	-1.19428	3.41656	-7.86397	2.54e-14	2.7e-13	21.4128
NDNF	-1.19472	3.73331	-9.05228	3.66e-18	5.98e-17	30.1351
NFIX	-1.19919	3.46698	-15.2508	5.25e-43	4.54e-41	86.8936
HLF	-1.21265	1.63847	-13.9852	1.9e-37	1.3e-35	74.1664
FOXA2	-1.22619	3.00172	-9.40106	2.32e-19	4.31e-18	32.861
LRRK2	-1.24477	2.36236	-10.2954	1.44e-22	3.69e-21	40.1647
CXCL14	-1.25738	4.21987	-5.81631	1.11e-08	5.51e-08	8.6938
CHRDL1	-1.26679	2.07479	-12.515	3.03e-31	1.56e-29	59.9787
SCNN1B	-1.28147	3.52783	-10.1273	5.97e-22	1.44e-20	38.7588
GKN2	-1.28339	1.48802	-8.45838	3.4e-16	4.43e-15	25.6629
ROS1	-1.28732	2.8406	-10.3809	6.97e-23	1.83e-21	40.8854
CLDN2	-1.30804	2.07185	-6.96311	1.12e-11	8.51e-11	15.4334
FCER1A	-1.31317	1.91993	-11.5622	2.1e-27	8.43e-26	51.2059
MGP	-1.3173	5.96164	-13.8676	6.12e-37	4.04e-35	73.0064
TMPRSS2	-1.33987	3.86931	-12.8773	9.62e-33	5.37e-31	63.4062
ALOX15B	-1.34136	3.58579	-9.10658	2.39e-18	4e-17	30.5548
DMBT1	-1.35652	3.01118	-7.12608	3.87e-12	3.16e-11	16.4722
AGER	-1.35928	3.76634	-8.09186	4.99e-15	5.68e-14	23.0146
SFTA3	-1.36813	4.47504	-9.96918	2.24e-21	5.07e-20	37.4501
MS4A15	-1.39246	1.80133	-8.79126	2.75e-17	4.09e-16	28.1427
CLU	-1.40097	5.16302	-10.5807	1.25e-23	3.52e-22	42.5836
WIF1	-1.40945	2.03886	-8.34875	7.66e-16	9.6e-15	24.8617
SLC34A2	-1.41271	7.95093	-8.70542	5.3e-17	7.62e-16	27.4966
SLC26A9	-1.41332	2.51622	-10.0829	8.67e-22	2.04e-20	38.3899
SFTA2	-1.41818	7.02705	-8.6384	8.8e-17	1.23e-15	26.9953
HSD17B6	-1.42611	2.68413	-12.3145	2.01e-30	9.75e-29	58.102
CTSH	-1.42666	6.00431	-13.5141	2e-35	1.26e-33	69.5425
AQP4	-1.42827	2.96232	-9.1588	1.59e-18	2.7e-17	30.96
ATP13A4	-1.4301	2.2546	-12.2975	2.36e-30	1.13e-28	57.9443
SCTR	-1.45821	2.11782	-11.8899	1.04e-28	4.53e-27	54.1815
ELN	-1.45854	3.62847	-13.68	3.91e-36	2.5e-34	71.1638
SLC22A3	-1.46319	2.91901	-13.1796	5.21e-34	3.12e-32	66.3028
SELENBP1	-1.46955	5.3282	-13.1132	9.91e-34	5.82e-32	65.6636
CLDN18	-1.47303	2.45461	-7.76236	5.19e-14	5.31e-13	20.7099
ALPL	-1.49171	4.27666	-9.43622	1.75e-19	3.3e-18	33.1398
RNASE1	-1.50175	7.94043	-12.3981	9.15e-31	4.53e-29	58.8826
HOPX	-1.5101	4.68357	-10.7581	2.69e-24	8.09e-23	44.108
AGR3	-1.51999	4.81038	-8.52377	2.09e-16	2.79e-15	26.1445
INMT	-1.52465	2.58767	-15.6218	1.14e-44	1.06e-42	90.6983
SLPI	-1.53438	8.02252	-8.45007	3.61e-16	4.7e-15	25.6019
PLA2G1B	-1.54331	1.8601	-11.8355	1.72e-28	7.39e-27	53.6843
VSIG2	-1.58027	3.2822	-10.7854	2.12e-24	6.42e-23	44.3447
MFAP4	-1.58291	4.83926	-13.8385	8.16e-37	5.32e-35	72.7197
ADGRF5	-1.62759	4.62815	-14.3463	5.15e-39	3.8e-37	77.7548
CACNA2D2	-1.64845	2.56682	-12.4563	5.29e-31	2.66e-29	59.427
C1orf116	-1.66943	4.84524	-13.8623	6.44e-37	4.24e-35	72.9544
C4BPA	-1.6884	5.25811	-9.00733	5.19e-18	8.3e-17	29.7891
GGTLC1	-1.76367	2.57648	-11.5384	2.6e-27	1.04e-25	50.9918
C7	-1.86198	3.36891	-14.5439	7.03e-40	5.31e-38	79.7338
PEBP4	-1.86872	2.80616	-12.0088	3.48e-29	1.57e-27	55.272
ADH1B	-1.90731	2.20157	-16.7341	1.02e-49	1.17e-47	102.268
SFTPD	-2.08343	5.85286	-10.5891	1.17e-23	3.28e-22	42.6554
SFTPA2	-2.17965	8.22714	-8.0057	9.27e-15	1.03e-13	22.4049
FOLR1	-2.22137	5.58505	-14.1096	5.51e-38	3.85e-36	75.399
SUSD2	-2.22516	3.95523	-14.9268	1.45e-41	1.16e-39	83.5967
NAPSA	-2.25428	7.71632	-11.6788	7.24e-28	3.01e-26	52.2599
SFTPA1	-2.33581	7.94617	-8.49881	2.51e-16	3.31e-15	25.9604
SFTPB	-2.39023	9.65099	-10.4851	2.86e-23	7.81e-22	41.7685
PIGR	-2.42851	5.86845	-11.1511	8.45e-26	2.93e-24	47.5399
CYP4B1	-2.52731	3.51465	-16.1768	3.55e-47	3.73e-45	96.4427
PGC	-2.54808	4.57067	-8.24286	1.67e-15	2.01e-14	24.095
SCGB1A1	-2.57776	4.65592	-8.84505	1.82e-17	2.76e-16	28.5499
SFTPC	-2.59222	5.19535	-8.50663	2.37e-16	3.14e-15	26.018
SCGB3A1	-2.88278	5.41286	-11.4944	3.87e-27	1.51e-25	50.5961
C16orf89	-2.88476	5.44362	-16.8067	4.73e-50	5.53e-48	103.03
SCGB3A2	-3.00897	5.75283	-12.3056	2.18e-30	1.05e-28	58.0195
