# Supplementary material for: A robust six-gene prognostic signature based on two prognostic subtypes constructed by chromatin regulators is correlated with immunological features and therapeutic response in lung adenocarcinoma
Source: Aging (Albany NY). 2023 Nov 7;15(21):12330–68. doi: 10.18632/aging.205183 (PMC10683604; doi:10.18632/aging.205183)
Supplement: Supplementary Table 6 [file aging-15-205183-s007.xls]

## Sheet: Supplementary Table S5
Supplementary Table 6. Key differentially expressed genes with significant prognostic value.
Gene symbol	p.value	HR	Low 95%CI	High 95%CI
HJURP	0.00407134	1.22361	1.06621	1.40424
TPX2	0.00275528	1.18588	1.06064	1.32591
CCNB2	0.011303	1.19379	1.0409	1.36913
CEP55	0.0256923	1.16567	1.01879	1.33373
CCNB1	0.000693828	1.26983	1.10611	1.45778
BIRC5	0.0395852	1.13126	1.0059	1.27226
CENPA	0.0353337	1.16299	1.01043	1.33859
KIF2C	0.0461709	1.14158	1.00225	1.30027
NEK2	0.00123421	1.25665	1.09403	1.44346
CCNA2	0.008716	1.19884	1.04691	1.37282
NUF2	0.0246634	1.17058	1.0203	1.34299
NCAPG	0.00227222	1.26835	1.08879	1.47752
PLK1	0.00685168	1.22568	1.05759	1.42049
KIF23	0.0158492	1.22085	1.03813	1.43574
DLGAP5	0.00153808	1.257	1.09111	1.44812
KPNA2	0.0099477	1.21996	1.0488	1.41906
NCAPH	0.0033805	1.24467	1.0752	1.44085
MELK	0.0124561	1.18348	1.037	1.35064
CDKN3	0.0175723	1.17996	1.02931	1.35265
BUB1	0.00405124	1.25021	1.07361	1.45586
KIF4A	0.00262785	1.2431	1.07878	1.43245
PRC1	0.0099497	1.22638	1.05011	1.43224
SKA3	0.014003	1.24962	1.04613	1.49271
PRR11	0.0133481	1.21106	1.04061	1.40942
BUB1B	0.00239118	1.2693	1.08824	1.4805
KIFC1	0.0289394	1.15727	1.01511	1.31932
CDK1	0.00605579	1.207	1.05526	1.38054
NUSAP1	0.00425313	1.2384	1.06954	1.43393
KIF11	0.00427058	1.25834	1.07484	1.47316
SPAG5	0.0313171	1.17389	1.01448	1.35834
RACGAP1	0.0442723	1.18305	1.00432	1.39359
KIF20A	0.000902774	1.31392	1.11829	1.54378
CKAP2L	0.00631018	1.28763	1.074	1.54377
DEPDC1	0.0230055	1.2216	1.02798	1.45169
SGO1	0.00928821	1.34965	1.07672	1.69176
FOXM1	0.0170298	1.16692	1.02795	1.32467
ZWINT	0.0116782	1.20104	1.04165	1.38482
TTK	0.0190733	1.21532	1.03247	1.43054
RRM2	0.000761421	1.24543	1.09604	1.4152
AURKA	0.0274123	1.16929	1.01757	1.34364
TOP2A	0.0132713	1.15475	1.03046	1.29402
SPC25	0.0145211	1.24532	1.04442	1.48488
CDC25C	0.00202572	1.39291	1.12857	1.71916
NDC80	0.00763983	1.23293	1.05712	1.43798
GTSE1	0.0134454	1.23593	1.04484	1.46198
RAD51	0.0235409	1.25681	1.03122	1.53176
CDCA2	0.00171935	1.37417	1.12651	1.67628
EXO1	0.00163356	1.3101	1.10742	1.54987
DEPDC1B	0.000377587	1.37946	1.15529	1.64714
PBK	0.00269038	1.21775	1.07073	1.38495
ANLN	8.59286e-05	1.28179	1.13243	1.45087
RAD51AP1	0.0169061	1.21392	1.03541	1.4232
SPC24	0.0158357	1.2202	1.03805	1.4343
KIF15	0.0190048	1.28218	1.0417	1.57817
ARHGAP11A	0.00233383	1.30759	1.10022	1.55404
HMMR	0.00074963	1.30268	1.11703	1.5192
MKI67	0.00647775	1.20874	1.05454	1.3855
TRIP13	0.0254374	1.16502	1.01895	1.33202
KIF14	0.00127246	1.37258	1.13208	1.66419
PCLAF	0.0178362	1.20475	1.03268	1.40547
PLK4	0.0195646	1.27365	1.03958	1.56043
GINS1	0.0394383	1.18192	1.00812	1.3857
MCM4	0.00702531	1.23478	1.05924	1.43941
CENPE	0.00675096	1.33687	1.08358	1.64938
UHRF1	0.031713	1.20545	1.01649	1.42954
CENPI	0.0325046	1.27201	1.02025	1.58588
TACC3	0.0234494	1.21988	1.02721	1.44869
ASPM	0.000687765	1.32796	1.12734	1.56427
CENPF	0.0018505	1.2502	1.08624	1.43891
SHCBP1	0.0250208	1.24238	1.0276	1.50206
CHEK1	0.0458359	1.2178	1.00365	1.47765
FAM83D	0.0390749	1.15755	1.00736	1.33013
FANCI	0.0165698	1.26225	1.0433	1.52714
OIP5	0.00513412	1.28698	1.07853	1.53572
H2AFZ	0.044853	1.22947	1.00476	1.50443
SGO2	0.00410278	1.40233	1.11319	1.76658
ECT2	0.00110749	1.2974	1.1095	1.51712
DTL	0.0023885	1.33387	1.10758	1.6064
C17orf53	0.00497461	1.29726	1.08182	1.55562
TK1	0.0303127	1.15103	1.01347	1.30726
KIF18A	0.00183037	1.47412	1.15489	1.88158
CENPU	0.0173505	1.21135	1.03436	1.41861
LMNB1	0.00795347	1.24136	1.05817	1.45626
KNL1	0.000946364	1.48605	1.17502	1.87942
TYMS	0.0158348	1.22374	1.03862	1.44187
KNSTRN	0.0338922	1.2364	1.01628	1.50421
PTTG1	0.0181282	1.1861	1.02954	1.36647
CDCA4	0.0412801	1.22399	1.00803	1.48623
DTYMK	0.0393806	1.24289	1.01063	1.52853
CENPH	0.000146784	1.5419	1.23302	1.92817
MTHFD2	0.0386812	1.18458	1.00885	1.39092
ERCC6L	0.0422852	1.2871	1.00883	1.64211
CENPO	0.0353895	1.32072	1.01921	1.71143
ATAD2	0.032131	1.19599	1.01539	1.40872
KIF20B	0.0043932	1.38428	1.10675	1.73139
RFC3	0.0255407	1.27042	1.02971	1.56741
NCAPD2	0.0350402	1.22081	1.0141	1.46966
FANCD2	0.00981296	1.43285	1.09055	1.8826
WDR76	0.0379503	1.26356	1.0131	1.57594
BLM	0.00495715	1.40912	1.1093	1.78997
HMGA1	0.0497231	1.1406	1.00016	1.30077
CENPK	0.000237046	1.48177	1.20149	1.82743
WDHD1	0.0209713	1.2782	1.03775	1.57436
CCNE1	0.0193265	1.17593	1.02662	1.34695
HSPD1	0.0258654	1.2833	1.03049	1.59815
GAPDH	0.0219223	1.22695	1.03005	1.4615
FAM111B	0.0151276	1.23026	1.04085	1.45414
SLC2A1	0.0014456	1.18608	1.06785	1.3174
HELLS	0.0274547	1.25992	1.02601	1.54715
CTSV	0.0206944	1.18621	1.02644	1.37085
UCK2	0.00504067	1.24152	1.06731	1.44416
GNPNAT1	0.00486364	1.33479	1.09175	1.63194
ERO1A	0.00194137	1.29305	1.09907	1.52128
PLOD2	0.0072829	1.17538	1.04454	1.32262
PFKP	0.01479	1.17459	1.03203	1.33685
CYCS	0.0041835	1.3692	1.10427	1.69769
GPI	0.030623	1.26759	1.0224	1.57157
CCT6A	0.00521982	1.29968	1.08133	1.56212
LDHA	0.000853863	1.42675	1.15779	1.75819
RAB5IF	0.0292514	1.25914	1.02354	1.54897
PFN2	0.0421141	1.1231	1.00415	1.25615
STRIP2	0.00591443	1.22248	1.05955	1.41047
ARNTL2	0.00316929	1.22489	1.07049	1.40157
IGF2BP3	0.00439803	1.20967	1.06115	1.37897
FKBP4	0.0276585	1.24117	1.02404	1.50433
TUBB3	0.0185675	1.22531	1.0346	1.45116
COCH	0.0458076	1.14739	1.00256	1.31313
MELTF	0.0160182	1.18801	1.0326	1.3668
FAM83A	0.000298171	1.18598	1.08127	1.30082
CCT2	0.0380315	1.17154	1.00878	1.36055
LOXL2	0.00698207	1.18758	1.04814	1.34558
ADGRF4	0.00385389	1.20918	1.06303	1.37543
SLC16A3	0.0190771	1.20053	1.0304	1.39874
ANP32E	0.0303236	1.1858	1.01633	1.38352
RHPN2	0.00136077	1.28228	1.10129	1.493
RHOV	0.000135179	1.18418	1.08572	1.29158
LYPD3	0.00113101	1.17413	1.06597	1.29326
DSG2	0.0113923	1.20905	1.04373	1.40057
PLEK2	0.00854237	1.20963	1.04967	1.39396
PKP2	0.00165431	1.23565	1.08305	1.40975
PRAME	0.0252052	1.08894	1.01065	1.1733
MDFI	0.00139564	1.20517	1.07482	1.35131
CYP24A1	0.0373828	1.07747	1.00437	1.1559
ANGPTL4	0.00053174	1.16612	1.06901	1.27205
GJB2	0.0191652	1.11068	1.01728	1.21265
BASP1	0.0140094	1.14381	1.02755	1.27321
DUSP4	0.0462173	1.09835	1.00157	1.20448
CCL20	0.000381515	1.14011	1.06055	1.22565
CPS1	0.000152526	1.10678	1.05016	1.16644
POSTN	0.0485877	1.11259	1.00066	1.23704
SLC16A14	0.034218	1.10182	1.00724	1.20529
GJB3	0.000432692	1.18825	1.07942	1.30806
TMPRSS11E	0.0498651	1.08708	1.00005	1.18168
KRT6A	0.0194713	1.07405	1.01158	1.14038
S100P	0.0320081	1.05709	1.00478	1.11213
CRY2	0.0226855	0.777377	0.625981	0.965389
C16orf89	0.00450454	0.915414	0.861257	0.972975
ADH1B	0.0281675	0.898296	0.816255	0.988583
CYP4B1	0.000547912	0.884358	0.824824	0.948189
INMT	0.0164284	0.867702	0.772725	0.974352
CBX7	0.00117978	0.684707	0.544642	0.860792
NFIX	0.0115987	0.835811	0.727152	0.960706
SUSD2	0.00584946	0.898906	0.833295	0.969683
SCN4B	0.0194986	0.745368	0.582478	0.953809
ADGRF5	0.0397365	0.900465	0.814837	0.995092
ADAMTS8	0.0344657	0.802344	0.654205	0.984027
HLF	0.00259016	0.805039	0.699105	0.927025
MGP	0.0287228	0.878023	0.781417	0.986572
C1orf116	0.0454986	0.912215	0.833669	0.998162
MFAP4	0.0368736	0.900237	0.815633	0.993616
CTSH	0.00603756	0.854125	0.763202	0.955879
VAMP2	0.0300564	0.766261	0.60244	0.974631
SELENBP1	0.0312768	0.893574	0.806592	0.989937
GNG7	0.000500856	0.66465	0.528061	0.836568
TMPRSS2	0.0337905	0.886861	0.79379	0.990844
SNX30	0.00722558	0.800143	0.680011	0.941497
CHRDL1	0.0482946	0.888094	0.789414	0.999111
TEF	0.00218551	0.741136	0.611884	0.897691
CACNA2D2	0.0409396	0.911466	0.833948	0.99619
VIPR1	0.0173353	0.786495	0.645331	0.958538
PHACTR1	0.0458452	0.782494	0.615074	0.995484
RNASE1	0.0105232	0.883265	0.803134	0.971391
EFCC1	0.0119324	0.72772	0.568009	0.932339
HSD17B6	0.0147261	0.875074	0.786092	0.974129
SCGB3A2	0.0292063	0.948698	0.904839	0.994684
ATP13A4	0.0208793	0.883769	0.795815	0.981444
CX3CR1	0.044228	0.815771	0.668992	0.994755
PEBP4	0.0163543	0.910091	0.842722	0.982846
DPYSL2	0.0215213	0.830145	0.708308	0.97294
GPD1L	0.037173	0.833605	0.702457	0.989238
SLC15A2	0.015999	0.827509	0.709366	0.965327
NAPSA	0.00466416	0.921505	0.870771	0.975194
FCER1A	0.0454498	0.896257	0.80506	0.997785
GGTLC1	0.0273315	0.911753	0.839928	0.989721
SCGB3A1	0.00931267	0.93872	0.895027	0.984547
MS4A2	0.00744326	0.736628	0.588884	0.921439
METTL7A	0.0313302	0.837508	0.712653	0.984238
HPGDS	0.00572871	0.78098	0.655361	0.930677
PIGR	0.049853	0.946926	0.8967	0.999965
PLA2G4F	0.0408192	0.847664	0.723509	0.993123
FCGRT	0.0131955	0.792795	0.659807	0.952587
VSIG2	0.0353449	0.914777	0.841949	0.993906
ESYT3	0.0209156	0.789865	0.646563	0.964928
SFTPD	0.0396254	0.938504	0.883446	0.996992
DAAM2	0.00782292	0.812316	0.696945	0.946786
TMEM125	0.00489202	0.826879	0.724338	0.943937
SFTPB	0.0320598	0.945749	0.898726	0.995232
TMEM243	0.0357444	0.809417	0.664448	0.986016
BTG2	0.0457269	0.878039	0.772859	0.997533
FAM189A2	0.0165847	0.81604	0.691009	0.963694
RCAN2	0.00403803	0.806018	0.695828	0.933659
ALDH2	0.0103038	0.813765	0.69522	0.952524
MAOB	0.00315138	0.814472	0.710746	0.933336
TPPP	0.0239671	0.844478	0.729217	0.977958
CTSG	0.0118876	0.758059	0.610901	0.940664
TLR2	0.0105571	0.841355	0.737013	0.960467
B3GNT8	0.0390814	0.881514	0.781991	0.993702
SFTA3	0.00487461	0.882915	0.809594	0.962876
MTURN	0.0225807	0.817835	0.688027	0.972134
HLA-DMA	0.00699542	0.841872	0.742886	0.954048
PTGDS	0.026114	0.889079	0.801591	0.986115
CPA3	0.016512	0.889849	0.808873	0.978931
CLEC3B	0.00752368	0.845364	0.747383	0.956189
FOXA2	0.00838077	0.885638	0.809178	0.969322
RTN4RL1	0.0149411	0.788653	0.651399	0.954827
GDF10	0.00961255	0.774416	0.638174	0.939744
HLA-DPB1	0.0439715	0.894382	0.802334	0.99699
PRELP	0.0331826	0.880358	0.782948	0.989886
TPSAB1	0.00987666	0.866149	0.776579	0.966051
UBTD1	0.00658899	0.800027	0.681091	0.939731
TPSB2	6.02602e-05	0.812444	0.734045	0.899216
HAS3	0.0121208	0.867358	0.776092	0.969357
AGER	0.0262175	0.916075	0.847943	0.989683
HLA-DRB1	0.0351776	0.898066	0.81257	0.992558
CD74	0.0267272	0.888308	0.799944	0.986433
SLC47A1	0.0350246	0.842506	0.718414	0.988032
CYP27A1	0.0469247	0.873464	0.764343	0.998162
GLB1L3	0.0130599	0.860744	0.764624	0.968945
KCNK5	0.00304	0.836472	0.743303	0.941319
HLA-DRB5	0.00322614	0.881665	0.810785	0.958741
NINJ2	0.0464107	0.858442	0.738714	0.997575
DEPTOR	0.0354313	0.847614	0.726596	0.98879
HLA-DPA1	0.0344236	0.895216	0.807943	0.991915
SOD3	0.0459845	0.878537	0.773611	0.997694
MS4A8	0.0234095	0.874359	0.778519	0.981996
MFSD4A	0.014638	0.88332	0.799573	0.975839
FBP1	0.00914051	0.82997	0.721451	0.954812
HLA-DRA	0.0336837	0.892391	0.803389	0.991254
CLDN2	0.023458	0.917965	0.852455	0.98851
CAPS	0.0253187	0.868207	0.767071	0.982677
HLA-DQB1	0.0109631	0.887406	0.809379	0.972954
GPX3	0.019763	0.856088	0.751231	0.97558
GDF15	0.0358726	0.906014	0.826223	0.993511
CX3CL1	0.0355395	0.89645	0.809587	0.992633
KIF12	0.0459118	0.884953	0.784882	0.997784
NR0B2	0.0371758	0.89112	0.799555	0.993171
CIT	0.0450212	0.899828	0.81159	0.99766
SLC1A7	0.027582	0.90067	0.82063	0.988518
