# Supplementary material for: A robust six-gene prognostic signature based on two prognostic subtypes constructed by chromatin regulators is correlated with immunological features and therapeutic response in lung adenocarcinoma
Source: Aging (Albany NY). 2023 Nov 7;15(21):12330–68. doi: 10.18632/aging.205183 (PMC10683604; doi:10.18632/aging.205183)
Supplement: Supplementary Table 7 [file aging-15-205183-s008.xls]

## Sheet: tcga.kegg.cor.res
Supplementary Table 7. Dysregulated KEGG pathways associated with risk score.
Pathway description	p value	Correlation coefficient
CELL_CYCLE	0	0.59746
P53_SIGNALING_PATHWAY	0	0.52024
DNA_REPLICATION	0	0.466932
HOMOLOGOUS_RECOMBINATION	0	0.466173
OOCYTE_MEIOSIS	0	0.45949
PYRIMIDINE_METABOLISM	0	0.447338
RNA_DEGRADATION	0	0.43826
ONE_CARBON_POOL_BY_FOLATE	0	0.436539
MISMATCH_REPAIR	0	0.433107
BASE_EXCISION_REPAIR	0	0.417894
UBIQUITIN_MEDIATED_PROTEOLYSIS	0	0.416407
PROTEASOME	0	0.403746
NUCLEOTIDE_EXCISION_REPAIR	0	0.402713
SPLICEOSOME	0	0.39616
GLYOXYLATE_AND_DICARBOXYLATE_METABOLISM	0	0.390355
NON_HOMOLOGOUS_END_JOINING	0	0.379217
BASAL_TRANSCRIPTION_FACTORS	0	0.370505
PATHOGENIC_ESCHERICHIA_COLI_INFECTION	8.17124e-14	0.334654
RIBOFLAVIN_METABOLISM	1.70086e-13	0.330548
PROGESTERONE_MEDIATED_OOCYTE_MATURATION	1.57785e-12	0.317684
PROTEIN_EXPORT	4.01812e-12	0.312098
PURINE_METABOLISM	2.8797e-11	0.299928
PENTOSE_PHOSPHATE_PATHWAY	1.20373e-10	0.290718
CYSTEINE_AND_METHIONINE_METABOLISM	3.47323e-10	0.283675
GALACTOSE_METABOLISM	4.48435e-10	0.281946
N_GLYCAN_BIOSYNTHESIS	4.87377e-09	0.265199
HUNTINGTONS_DISEASE	2.28654e-08	0.253697
BLADDER_CANCER	2.3541e-08	0.253475
ALZHEIMERS_DISEASE	5.95739e-08	0.246279
SMALL_CELL_LUNG_CANCER	9.36497e-08	0.242691
RNA_POLYMERASE	3.59692e-07	0.231667
AMINOACYL_TRNA_BIOSYNTHESIS	4.91291e-07	0.229033
AMYOTROPHIC_LATERAL_SCLEROSIS_ALS	7.62411e-07	0.225266
FOLATE_BIOSYNTHESIS	8.41851e-07	0.224407
CITRATE_CYCLE_TCA_CYCLE	1.12905e-06	0.221844
FRUCTOSE_AND_MANNOSE_METABOLISM	1.50788e-06	0.219288
DRUG_METABOLISM_OTHER_ENZYMES	4.29962e-06	0.209762
PARKINSONS_DISEASE	8.83861e-06	0.202948
STARCH_AND_SUCROSE_METABOLISM	1.00655e-05	0.201694
GLYCOLYSIS_GLUCONEOGENESIS	6.12616e-05	0.183398
REGULATION_OF_AUTOPHAGY	6.4112e-05	0.182914
OXIDATIVE_PHOSPHORYLATION	0.000180842	0.171525
CYTOSOLIC_DNA_SENSING_PATHWAY	0.000682712	0.155791
NICOTINATE_AND_NICOTINAMIDE_METABOLISM	0.00087144	0.152737
PENTOSE_AND_GLUCURONATE_INTERCONVERSIONS	0.00117417	0.148928
AMINO_SUGAR_AND_NUCLEOTIDE_SUGAR_METABOLISM	0.00144519	0.146222
GLYCOSPHINGOLIPID_BIOSYNTHESIS_LACTO_AND_NEOLACTO_SERIES	0.00221872	0.140488
THYROID_CANCER	0.00722167	0.123507
ALANINE_ASPARTATE_AND_GLUTAMATE_METABOLISM	0.00748958	0.122951
ENDOCYTOSIS	0.00907347	-0.119986
GLYCINE_SERINE_AND_THREONINE_METABOLISM	0.00580229	-0.126805
GRAFT_VERSUS_HOST_DISEASE	0.00499094	-0.129033
SNARE_INTERACTIONS_IN_VESICULAR_TRANSPORT	0.00447989	-0.13061
WNT_SIGNALING_PATHWAY	0.00421488	-0.131493
NON_SMALL_CELL_LUNG_CANCER	0.0031344	-0.13571
ACUTE_MYELOID_LEUKEMIA	0.00294927	-0.136563
B_CELL_RECEPTOR_SIGNALING_PATHWAY	0.00248687	-0.138927
RETINOL_METABOLISM	0.00239455	-0.139446
TYPE_I_DIABETES_MELLITUS	0.00186449	-0.14284
MTOR_SIGNALING_PATHWAY	0.0017307	-0.143836
PANTOTHENATE_AND_COA_BIOSYNTHESIS	0.00165655	-0.144419
METABOLISM_OF_XENOBIOTICS_BY_CYTOCHROME_P450	0.00159483	-0.144922
HISTIDINE_METABOLISM	0.00147232	-0.145977
HYPERTROPHIC_CARDIOMYOPATHY_HCM	0.00121587	-0.148477
INOSITOL_PHOSPHATE_METABOLISM	0.000646637	-0.156463
JAK_STAT_SIGNALING_PATHWAY	0.000491669	-0.159813
GLYCOSAMINOGLYCAN_DEGRADATION	0.000456902	-0.160699
NITROGEN_METABOLISM	0.000174719	-0.171915
ENDOMETRIAL_CANCER	0.000109134	-0.177159
NEUROACTIVE_LIGAND_RECEPTOR_INTERACTION	9.59185e-05	-0.178572
TIGHT_JUNCTION	6.57407e-05	-0.182646
LIMONENE_AND_PINENE_DEGRADATION	3.66988e-05	-0.188766
VASOPRESSIN_REGULATED_WATER_REABSORPTION	2.40016e-05	-0.193104
NEUROTROPHIN_SIGNALING_PATHWAY	1.48556e-05	-0.197892
OTHER_GLYCAN_DEGRADATION	1.33791e-05	-0.198922
LEUKOCYTE_TRANSENDOTHELIAL_MIGRATION	1.3084e-05	-0.19914
LEISHMANIA_INFECTION	8.1466e-06	-0.20373
HEDGEHOG_SIGNALING_PATHWAY	5.8939e-06	-0.206807
HEMATOPOIETIC_CELL_LINEAGE	4.60239e-06	-0.209128
AUTOIMMUNE_THYROID_DISEASE	4.39118e-06	-0.209566
VEGF_SIGNALING_PATHWAY	1.54759e-06	-0.219057
ALLOGRAFT_REJECTION	1.23975e-06	-0.221021
DILATED_CARDIOMYOPATHY	6.10434e-07	-0.22718
ETHER_LIPID_METABOLISM	3.39226e-07	-0.232158
DRUG_METABOLISM_CYTOCHROME_P450	3.11889e-07	-0.232861
PROPANOATE_METABOLISM	1.564e-07	-0.238553
TRYPTOPHAN_METABOLISM	1.30029e-07	-0.240051
SYSTEMIC_LUPUS_ERYTHEMATOSUS	1.05338e-07	-0.241749
MAPK_SIGNALING_PATHWAY	7.72723e-08	-0.244223
LINOLEIC_ACID_METABOLISM	5.71075e-08	-0.246612
LONG_TERM_POTENTIATION	5.30375e-08	-0.247192
INTESTINAL_IMMUNE_NETWORK_FOR_IGA_PRODUCTION	3.8946e-08	-0.249601
RENIN_ANGIOTENSIN_SYSTEM	3.61811e-08	-0.250172
PHOSPHATIDYLINOSITOL_SIGNALING_SYSTEM	3.29609e-08	-0.250892
LONG_TERM_DEPRESSION	3.09586e-08	-0.251375
BUTANOATE_METABOLISM	2.54965e-08	-0.252865
SULFUR_METABOLISM	1.4114e-08	-0.257347
VIRAL_MYOCARDITIS	5.08983e-09	-0.264884
PROXIMAL_TUBULE_BICARBONATE_RECLAMATION	3.64748e-09	-0.267296
MELANOGENESIS	1.28035e-09	-0.274722
BASAL_CELL_CARCINOMA	7.52419e-10	-0.278409
PPAR_SIGNALING_PATHWAY	7.09689e-10	-0.278811
PEROXISOME	5.03044e-10	-0.281165
BETA_ALANINE_METABOLISM	2.6204e-10	-0.285567
TYPE_II_DIABETES_MELLITUS	1.6942e-10	-0.288468
CALCIUM_SIGNALING_PATHWAY	9.66327e-11	-0.292155
CELL_ADHESION_MOLECULES_CAMS	2.49223e-12	-0.314967
FATTY_ACID_METABOLISM	2.27107e-12	-0.315522
GLYCOSPHINGOLIPID_BIOSYNTHESIS_GANGLIO_SERIES	2.05613e-12	-0.316114
ALPHA_LINOLENIC_ACID_METABOLISM	1.74305e-12	-0.317094
ABC_TRANSPORTERS	1.35114e-12	-0.3186
LYSOSOME	7.14095e-13	-0.322333
GNRH_SIGNALING_PATHWAY	3.97904e-13	-0.325712
GLYCEROPHOSPHOLIPID_METABOLISM	3.41061e-13	-0.326596
VALINE_LEUCINE_AND_ISOLEUCINE_DEGRADATION	2.54463e-13	-0.328267
ALDOSTERONE_REGULATED_SODIUM_REABSORPTION	3.5083e-14	-0.339291
ARACHIDONIC_ACID_METABOLISM	2.66454e-15	-0.352993
ASTHMA	2.22045e-15	-0.354049
FC_EPSILON_RI_SIGNALING_PATHWAY	1.9984e-15	-0.354556
VASCULAR_SMOOTH_MUSCLE_CONTRACTION	4.44089e-16	-0.361225
PRIMARY_BILE_ACID_BIOSYNTHESIS	0	-0.386811
